# Supplementary material for: 9-Ethyl-6,6-Dimethyl-8-[4-(Morpholin-4-Yl)piperidin-1-Yl]-11-Oxo-6,11-Dihydro-5H-Benzo[b]carbazole-3-Carbonitrile Hydrochloride
Source: Preprints.org preprint supplement (doi:10.20944/preprints202312.0869.v1), 2023-12-12
Supplement: Supplementary file 1 [file supplementary]

Supporting Information for

**9-Ethyl-6,6-dimethyl-8-[4-(morpholin-4-yl)piperidin-1-yl]-11-oxo-6,11-dihydro-5*H*-benzo[*b*]carbazole-3-carbonitrile hydrochloride**

Petr A. Buikin, Anna V. Vologzhanina, and Alexander A. Korlyukov

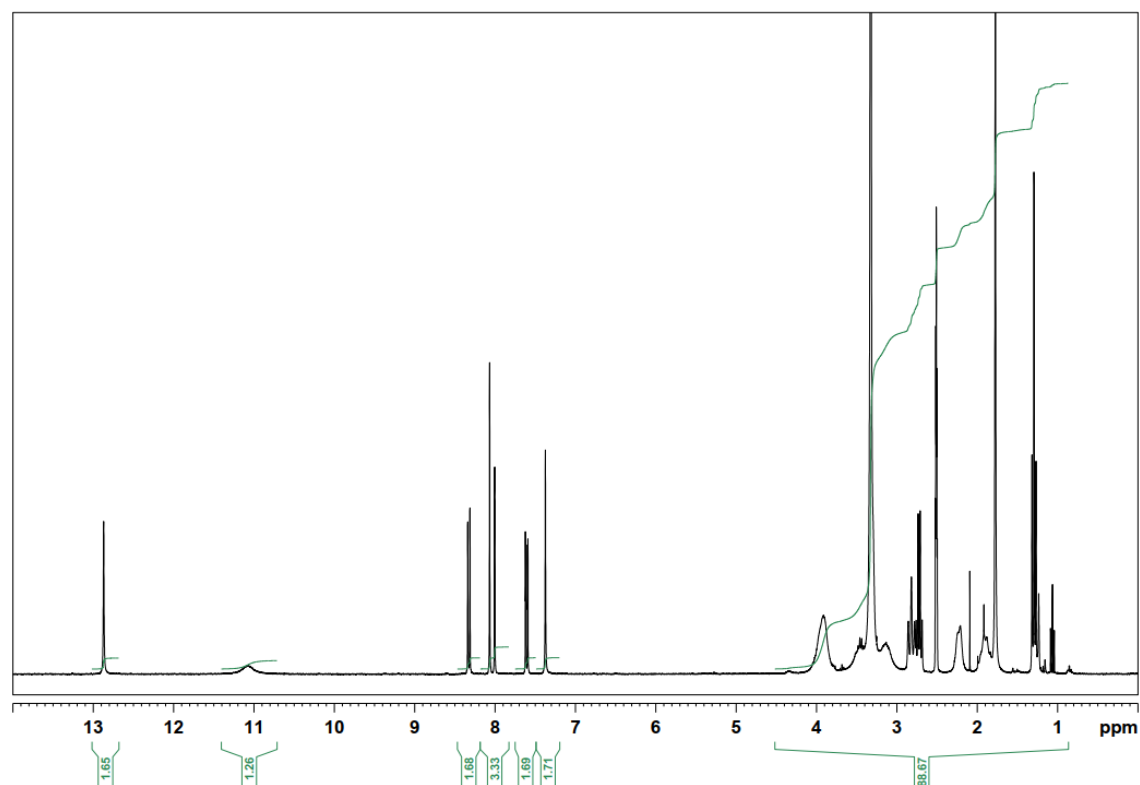

**Figure S1.** <sup>1</sup>H NMR spectrum of alectinib hydrochloride in DMSO solution.

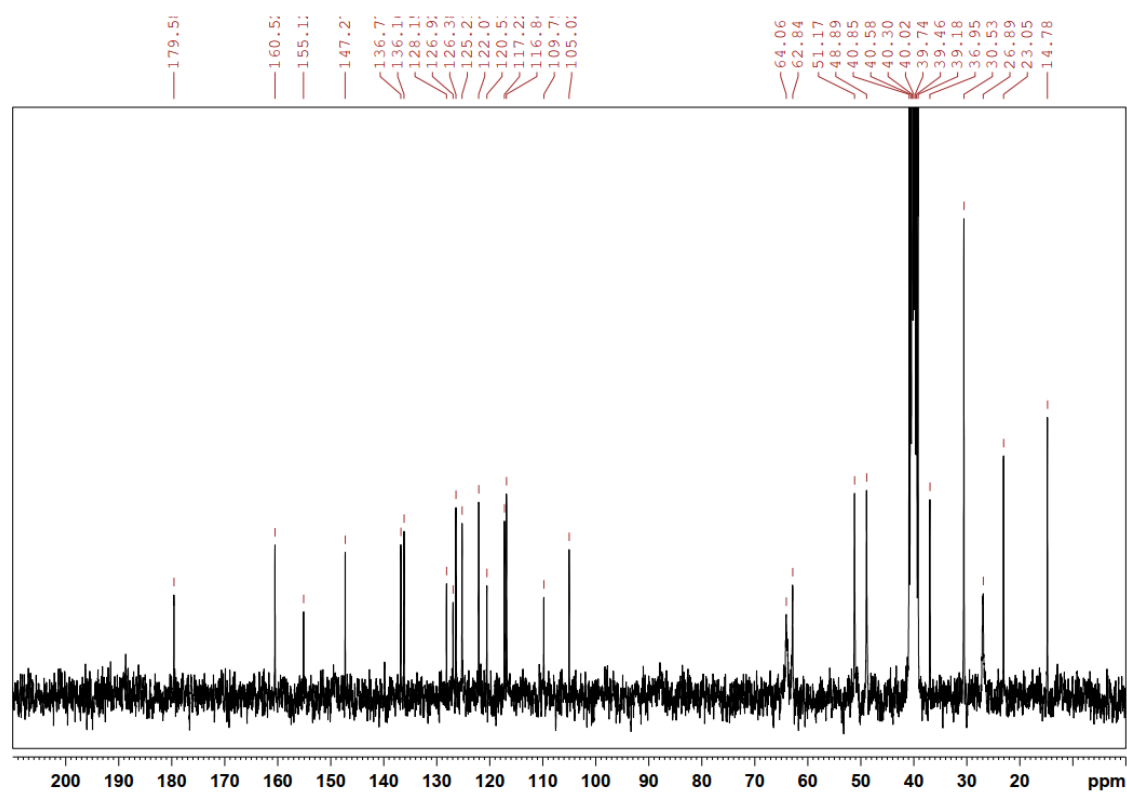

**Figure S2.** <sup>13</sup>C NMR spectrum of alectinib hydrochloride in DMSO solution.

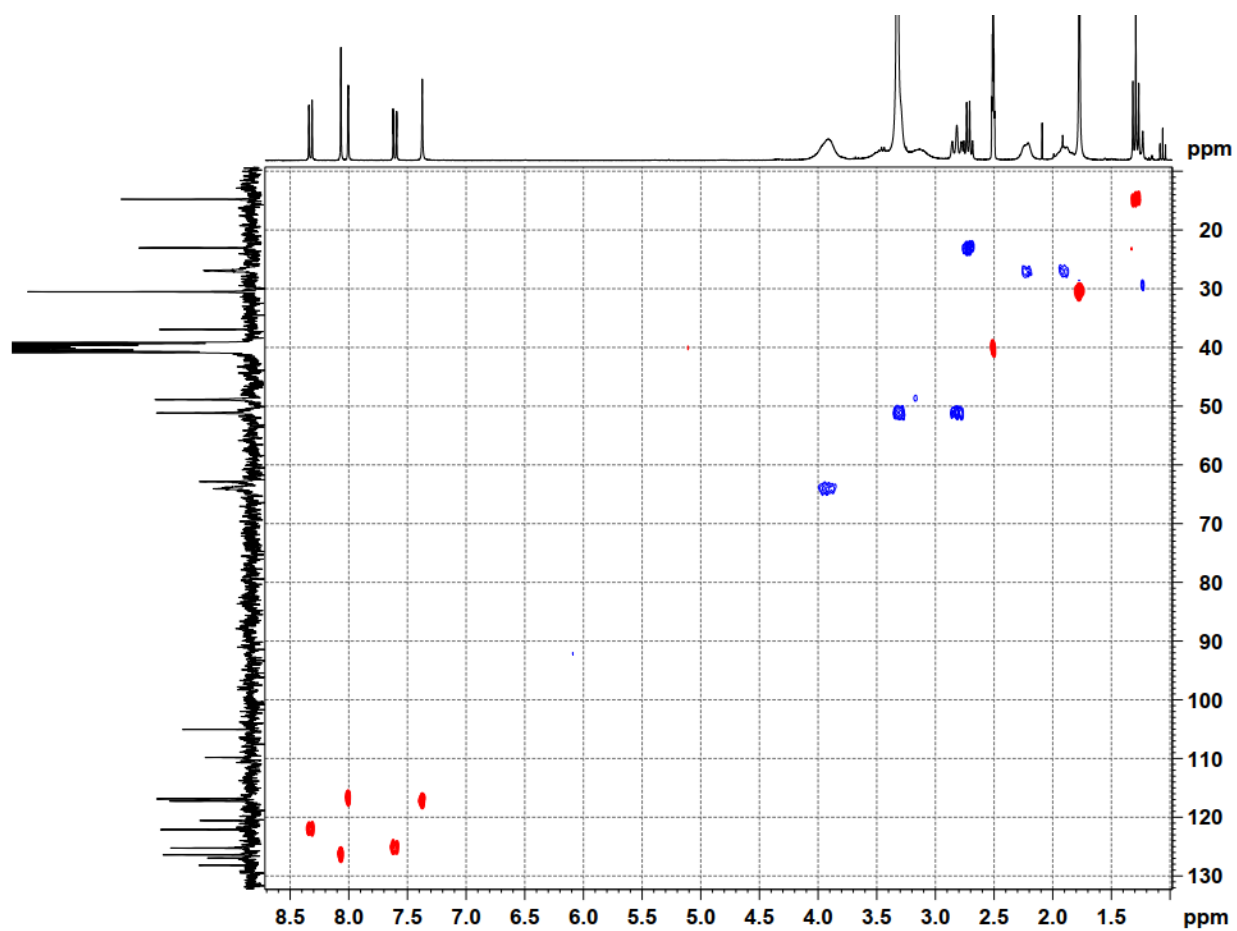

**Figure S3.** 2D NMR  $^{13}\text{C}$ - $^1\text{H}$  HSQC spectrum of alectinib hydrochloride in DMSO solution.

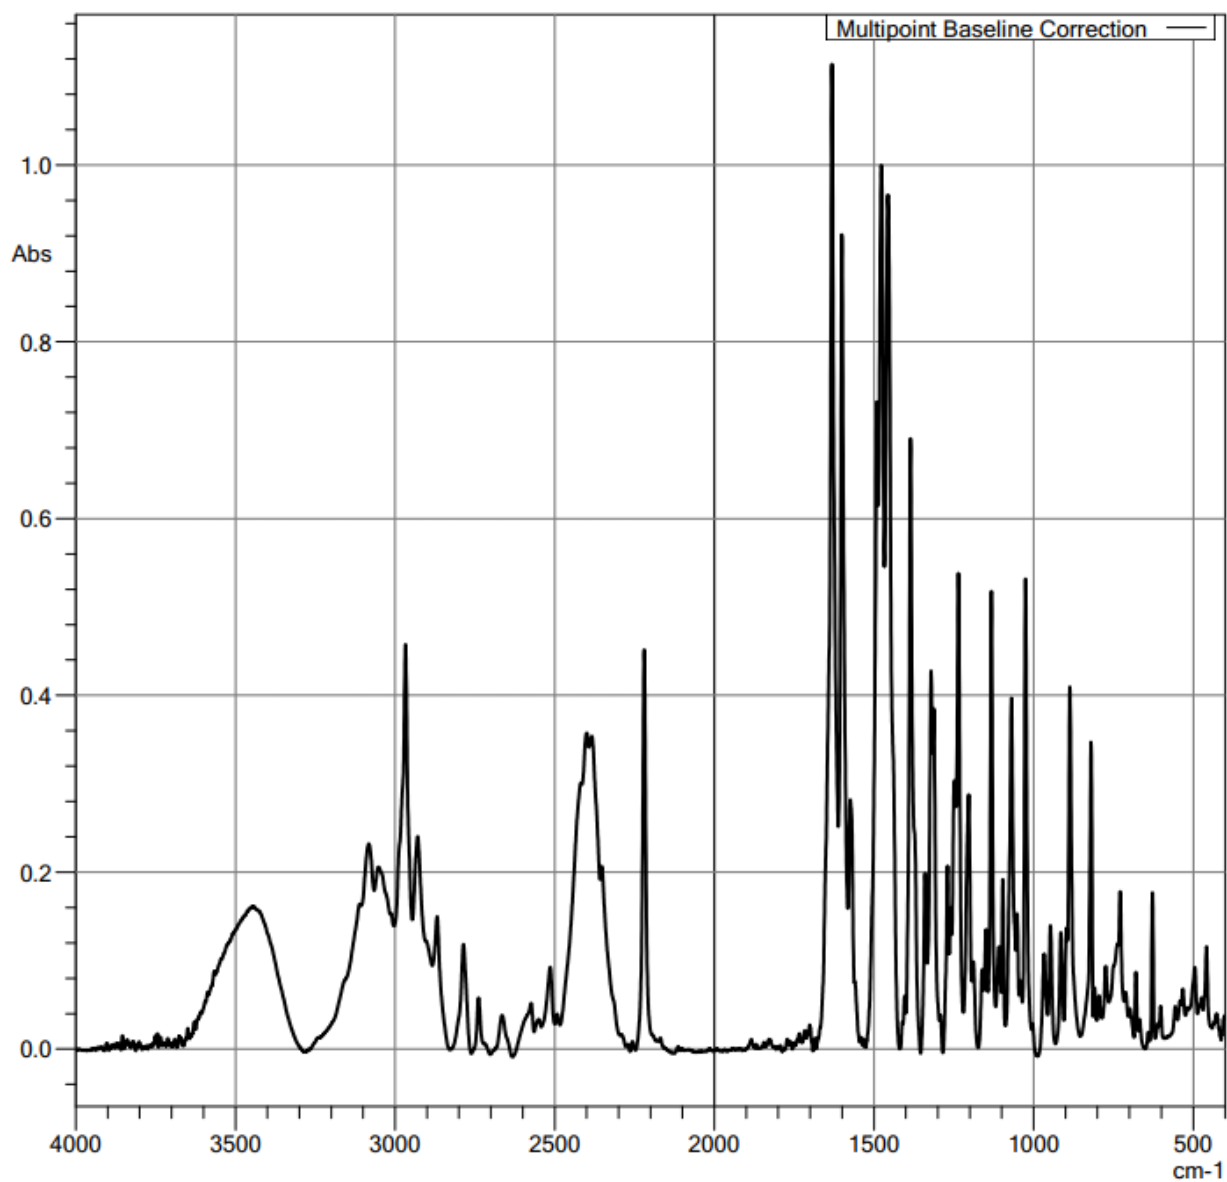

**Figure S4.** FTIR spectrum (in KBr pellets) of alectinib hydrochloride.

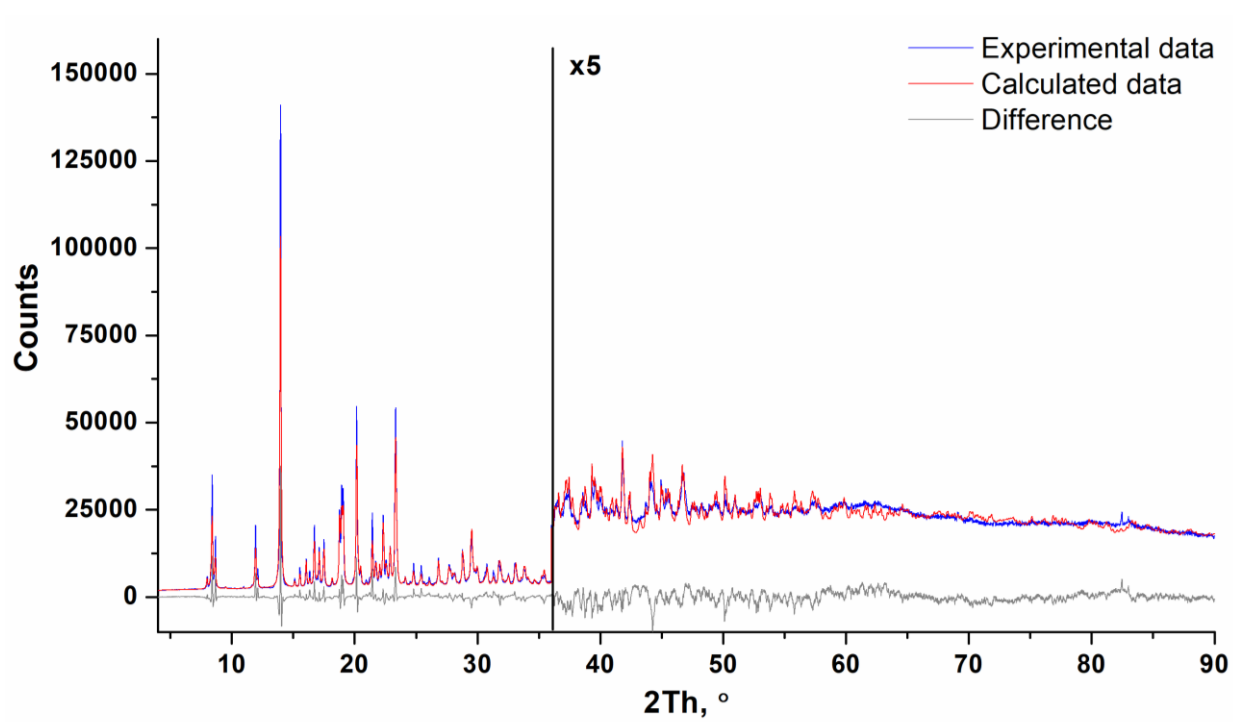

**Figure S5.** Rietveld plot of **1**.
