# Supplementary material for: 9-Ethyl-6,6-Dimethyl-8-[4-(Morpholin-4-Yl)piperidin-1-Yl]-11-Oxo-6,11-Dihydro-5H-Benzo[b]carbazole-3-Carbonitrile Hydrochloride
Source: Preprints.org preprint supplement (doi:10.20944/preprints202312.0869.v1), 2023-12-12
Supplement: Supplementary file 3 [file supplementary]

Archive with 4 entries (4 files):
- alectinib_V2000.mol
- checkcif.pdf
- ESI.pdf
- final2.cif
