# Supplementary material for: 9-Ethyl-6,6-Dimethyl-8-[4-(Morpholin-4-Yl)piperidin-1-Yl]-11-Oxo-6,11-Dihydro-5H-Benzo[b]carbazole-3-Carbonitrile Hydrochloride
Source: Preprints.org preprint supplement (doi:10.20944/preprints202312.0869.v1), 2023-12-12
Supplement: Supplementary file 3 [file supplementary › alectinib_V2000.mol]

KingDraw KingDraw.mol
KingDraw2D

 37 41  0  0  0  0  0  0  0  0999 V2000
    7.9867  -12.5268    0.0000 N   0  0  0  0  0  0  0  0  0  0  0  0
    7.3365  -12.7380    0.0000 C   0  0  0  0  0  0  0  0  0  0  0  0
    6.7444  -12.3962    0.0000 C   0  0  0  0  0  0  0  0  0  0  0  0
    6.1523  -12.7380    0.0000 C   0  0  0  0  0  0  0  0  0  0  0  0
    6.1523  -13.4217    0.0000 C   0  0  0  0  0  0  0  0  0  0  0  0
    6.7444  -13.7636    0.0000 C   0  0  0  0  0  0  0  0  0  0  0  0
    7.3365  -13.4217    0.0000 C   0  0  0  0  0  0  0  0  0  0  0  0
    7.9867  -13.6330    0.0000 C   0  0  0  0  0  0  0  0  0  0  0  0
    8.2648  -14.2576    0.0000 C   0  0  0  0  0  0  0  0  0  0  0  0
    8.9447  -14.3290    0.0000 C   0  0  0  0  0  0  0  0  0  0  0  0
    9.3466  -13.7759    0.0000 C   0  0  0  0  0  0  0  0  0  0  0  0
    9.0685  -13.1513    0.0000 C   0  0  0  0  0  0  0  0  0  0  0  0
    8.3886  -13.0799    0.0000 C   0  0  0  0  0  0  0  0  0  0  0  0
   10.0265  -13.8474    0.0000 C   0  0  0  0  0  0  0  0  0  0  0  0
   10.7065  -13.9188    0.0000 N   0  0  0  0  0  0  0  0  0  0  0  0
    6.7444  -14.4472    0.0000 O   0  0  0  0  0  0  0  0  0  0  0  0
    5.5602  -13.7636    0.0000 C   0  0  0  0  0  0  0  0  0  0  0  0
    4.9681  -13.4217    0.0000 C   0  0  0  0  0  0  0  0  0  0  0  0
    4.9681  -12.7380    0.0000 C   0  0  0  0  0  0  0  0  0  0  0  0
    5.5602  -12.3962    0.0000 C   0  0  0  0  0  0  0  0  0  0  0  0
    4.3760  -12.3962    0.0000 N   0  0  0  0  0  0  0  0  0  0  0  0
    3.7839  -12.7380    0.0000 C   0  0  0  0  0  0  0  0  0  0  0  0
    3.1919  -12.3962    0.0000 C   0  0  0  0  0  0  0  0  0  0  0  0
    3.1919  -11.7125    0.0000 C   0  0  0  0  0  0  0  0  0  0  0  0
    3.7839  -11.3707    0.0000 C   0  0  0  0  0  0  0  0  0  0  0  0
    4.3760  -11.7125    0.0000 C   0  0  0  0  0  0  0  0  0  0  0  0
    2.5998  -11.3707    0.0000 N   0  0  0  0  0  0  0  0  0  0  0  0
    2.0077  -11.7125    0.0000 C   0  0  0  0  0  0  0  0  0  0  0  0
    1.4156  -11.3707    0.0000 C   0  0  0  0  0  0  0  0  0  0  0  0
    1.4156  -10.6870    0.0000 O   0  0  0  0  0  0  0  0  0  0  0  0
    2.0077  -10.3451    0.0000 C   0  0  0  0  0  0  0  0  0  0  0  0
    2.5998  -10.6870    0.0000 C   0  0  0  0  0  0  0  0  0  0  0  0
    4.3760  -13.7636    0.0000 C   0  0  0  0  0  0  0  0  0  0  0  0
    3.7839  -13.4217    0.0000 C   0  0  0  0  0  0  0  0  0  0  0  0
    6.4025  -11.8041    0.0000 C   0  0  0  0  0  0  0  0  0  0  0  0
    7.0862  -11.8041    0.0000 C   0  0  0  0  0  0  0  0  0  0  0  0
    9.5156  -10.5722    0.0000 Cl  0  0  0  0  0  0  0  0  0  0  0  0
  1  2  1  0
  2  3  1  0
  3  4  1  0
  4  5  1  0
  5  6  1  0
  6  7  1  0
  2  7  2  0
  7  8  1  0
  8  9  1  0
  9 10  2  0
 10 11  1  0
 11 12  2  0
 12 13  1  0
  8 13  2  0
  1 13  1  0
 11 14  1  0
 14 15  3  0
  6 16  2  0
 17  5  2  0
 17 18  1  0
 18 19  2  0
 19 20  1  0
 20  4  2  0
 19 21  1  0
 21 22  1  0
 22 23  1  0
 23 24  1  0
 24 25  1  0
 25 26  1  0
 21 26  1  0
 24 27  1  0
 27 28  1  0
 28 29  1  0
 29 30  1  0
 30 31  1  0
 31 32  1  0
 27 32  1  0
 18 33  1  0
 33 34  1  0
  3 35  1  0
  3 36  1  0
M  END
