# Supplementary material for: 9-Ethyl-6,6-Dimethyl-8-[4-(Morpholin-4-Yl)piperidin-1-Yl]-11-Oxo-6,11-Dihydro-5H-Benzo[b]carbazole-3-Carbonitrile Hydrochloride
Source: Preprints.org preprint supplement (doi:10.20944/preprints202312.0869.v1), 2023-12-12
Supplement: Supplementary file 3 [file supplementary › final2.cif]

data_alectinib_hydrochloride

#===============================================================================

# 5. CHEMICAL DATA

_chemical_name_systematic		
;
9-ethyl-6,6-dimethyl-8-(4-morpholin-4-ylpiperidin-1-yl)-11-oxo-5H-benzo[b]
carbazole-3-carbonitrile hydrochloride
;
_chemical_name_common				'Alectinib hydrochloride'
_chemical_melting_point                           ?
_chemical_formula_moiety                         'C30 H35 N4 O2, Cl'  
_chemical_formula_structural                      ?
_chemical_formula_sum                            'C30 H35 Cl N4 O2'
_chemical_formula_iupac                           ?
_chemical_formula_weight                          519.06
_chemical_compound_source                        'see text'

loop_
  _atom_type_symbol
  _atom_type_description
  _atom_type_scat_dispersion_real
  _atom_type_scat_dispersion_imag
  _atom_type_scat_source
 'C' 'C' 0.0181 0.0091 'International Tables Vol C Tables 4.2.6.8 and 6.1.1.4'
 'N' 'N' 0.0311 0.018 'International Tables Vol C Tables 4.2.6.8 and 6.1.1.4'
 'O' 'O' 0.0492 0.0322 'International Tables Vol C Tables 4.2.6.8 and 6.1.1.4'
 'H' 'H' 0.0000 0.0000 'International Tables Vol C Tables 4.2.6.8 and 6.1.1.4'
 'Cl' 'Cl' 0.3639 0.7018 'International Tables Vol C Tables 4.2.6.8 and 6.1.1.4'


#===============================================================================

# 6. CRYSTAL DATA

_space_group_crystal_system       'monoclinic'
_symmetry_space_group_name_H-M    'P 1 21/n 1'
_symmetry_space_group_name_Hall   '-P 2yn'
_space_group_IT_number            14

loop_
    _symmetry_equiv_pos_as_xyz
	'x,y,z'
	'-x+1/2,y+1/2,-z+1/2'
	'-x,-y,-z'
	'x-1/2,-y-1/2,z-1/2'


_cell_length_a			20.3941(9)
_cell_length_b			10.4451(4)
_cell_length_c			12.6842(5)
_cell_angle_alpha		90.0
_cell_angle_beta		93.113(1)
_cell_angle_gamma		90.0
_cell_volume			2698.0(2)
_cell_formula_units_Z           4
_cell_measurement_temperature   298.0
_cell_measurement_reflns_used   ?
_cell_measurement_theta_min     ?
_cell_measurement_theta_max     ?
_cell_special_details                            
;
;


_exptl_crystal_density_diffrn    1.278
_exptl_crystal_density_method    'Not Measured'
_exptl_crystal_F_000             276
_exptl_absorpt_coefficient_mu    ?
_exptl_crystal_density_meas_temp ?
 
_pd_spec_mounting                          
; 
 drifted powder on off-cut Si 
;
_pd_spec_mount_mode         reflection  # options are 'reflection' 
                                          # or 'transmission'
_pd_spec_shape              flat_sheet    # options are 'cylinder',
                                          # 'flat_sheet' or 'irregular'
_pd_char_particle_morphology      round
_pd_char_colour                   colourless   # use ICDD colour descriptions
_pd_prep_cool_rate                ?        
_pd_prep_pressure                 ?       
_pd_prep_temperature              ?
_exptl_absorpt_correction_type    ?
_exptl_absorpt_process_details    ?

#===============================================================================

# 7. EXPERIMENTAL DATA

_exptl_special_details               ?
_diffrn_radiation_wavelength         1.544493
_diffrn_radiation_probe              'x-ray'
_diffrn_radiation_type               'Cu K\a~1~, K\a~2~'
_diffrn_radiation_source             'Cu sealed tube'
_diffrn_radiation_monochromator      'none'
_diffrn_ambient_temperature          298.0                    
_diffrn_measurement_device_type      'area detector'
_diffrn_detector                     'LynxEye model "A17-B60"'
_diffrn_detector_type                'LynxEye'
_pd_meas_scan_method                 cont    # options are 'step', 'cont',
                                              # 'tof', 'fixed' or
                                              # 'disp' (= dispersive)
_pd_meas_number_of_points 6053
_pd_meas_2theta_range_min 3.5
_pd_meas_2theta_range_max 90.08233 
_pd_meas_2theta_range_inc 0.0143
 
_computing_data_collection           'Bruker XRD Commander'
_computing_cell_refinement           'TOPAS 4.2'
_computing_data_reduction            'TOPAS 4.2'
_computing_structure_solution        'TOPAS 4.2'
_computing_structure_refinement      'TOPAS 4.2'
_computing_molecular_graphics        'OLEX2 1.5'
_computing_publication_material      'PLATON'
 
#===============================================================================

# 8. REFINEMENT DATA


_pd_proc_ls_special_details              ?

# The next three items are given as text
_pd_proc_ls_profile_function      
;
fundumental parameters
;
_pd_proc_ls_background_function
;
6th order Chebyshev polynomial 
;

_pd_proc_ls_pref_orient_corr     
;
2nd order hkl dependent symmetrized spherical harmonics series (Jarvinen, 1993).

The coefficients used were:

y00   1.00000
y20   -0.12882(1137)
y22p   -0.25389(1017)
y22m   -0.50576(587)
 
;

_pd_proc_ls_prof_R_factor         0.07246
_pd_proc_ls_prof_wR_factor        0.09948
_pd_proc_ls_prof_wR_expected      0.01374


_refine_special_details               ?
_refine_ls_structure_factor_coef     Inet
_refine_ls_matrix_type               fullcycle
_refine_ls_weighting_scheme          calc
_refine_ls_weighting_details         '1/Y~i~'
_refine_ls_hydrogen_treatment        constr
_refine_ls_extinction_method         none        
_refine_ls_extinction_coef           ?           
_refine_ls_number_parameters         352
_refine_ls_number_restraints         105
_refine_ls_number_constraints        ? 


# The following item is the same as CHI, the square root of 'CHI squared'
_refine_ls_goodness_of_fit_all       7.238      
_refine_ls_R_I_factor                0.06379 # R-bragg
_refine_ls_restrained_S_all          ?           
_refine_ls_shift/su_max              0.001
_refine_ls_shift/su_mean             ?


# The following four items apply to angular dispersive measurements.
# 2theta minimum, maximum and increment (in degrees) are for the 
# intensities used in the refinement. 


_pd_proc_2theta_range_min 3.5  
_pd_proc_2theta_range_max 0.0
_pd_proc_2theta_range_inc 0.0143
_pd_proc_wavelength       1.544493
_pd_block_diffractogram_id     alectinib_hydrochloride

#===============================================================================

# 9. ATOMIC COORDINATES AND DISPLACEMENT PARAMETERS

loop_
_atom_site_label
_atom_site_type_symbol
_atom_site_symmetry_multiplicity
_atom_site_fract_x
_atom_site_fract_y
_atom_site_fract_z
_atom_site_occupancy
_atom_site_B_iso_or_equiv
Cl1	Cl	4	0.2833(4)	0.6185(8)	0.8476(5)	1	1.20048
O1 	O	4	0.6812(4)	0.7050(11)	0.6822(9)	1	3.64678
O2 	O	4	0.0622(3)	1.0670(8)	0.4190(7)	1	3.64678
N1 	N	4	0.7035(4)	0.5491(15)	0.3636(3)	1	4.23592
N2 	N	4	0.9711(6)	0.3762(10)	0.4232(6)	1	4.23592
N3 	N	4	0.4001(2)	0.8517(6)	0.5164(4)	1	4.23592
N4 	N	4	0.1968(2)	0.9821(5)	0.4515(5)	1	4.23592
C1 	C	4	0.7621(2)	0.5398(11)	0.4193(3)	1	4.84452
C2 	C	4	0.8135(4)	0.4910(9)	0.3929(3)	1	4.84452
C3 	C	4	0.85945(19)	0.4687(7)	0.4701(3)	1	4.84452
C4 	C	4	0.8527(2)	0.5129(10)	0.5647(4)	1	4.84452
C5 	C	4	0.7965(3)	0.5401(12)	0.5938(4)	1	4.84452
C6 	C	4	0.75176(18)	0.5667(8)	0.5228(3)	1	4.84452
C7 	C	4	0.68546(16)	0.6167(8)	0.5240(3)	1	4.84452
C8 	C	4	0.65397(17)	0.6739(8)	0.6010(3)	1	4.84452
C9 	C	4	0.5920(2)	0.7143(8)	0.5726(3)	1	4.84452
C10	C	4	0.5520(3)	0.7536(12)	0.6555(4)	1	4.84452
C11	C	4	0.4923(2)	0.8038(6)	0.6366(3)	1	4.84452
C12	C	4	0.4665(2)	0.7966(6)	0.5391(4)	1	4.84452
C13	C	4	0.5058(4)	0.7450(14)	0.4564(4)	1	4.84452
C14	C	4	0.56581(17)	0.6990(6)	0.4768(3)	1	4.84452
C15	C	4	0.60096(18)	0.6465(4)	0.3936(3)	1	4.84452
C16	C	4	0.65704(17)	0.5970(5)	0.4290(3)	1	4.84452
C17	C	4	0.9188(4)	0.4194(5)	0.4456(3)	1	4.84452
C18	C	4	0.4583(4)	0.8714(7)	0.7237(9)	1	4.84452
C19	C	4	0.4292(11)	0.7853(14)	0.7921(9)	1	4.84452
C20	C	4	0.5625(5)	0.5508(12)	0.3367(8)	1	4.84452
C21	C	4	0.6166(4)	0.7421(12)	0.3249(8)	1	4.84452
C22	C	4	0.3418(5)	0.7594(6)	0.5246(7)	1	4.84452
C23	C	4	0.2815(3)	0.8326(8)	0.5373(5)	1	4.84452
C24	C	4	0.2651(3)	0.9059(4)	0.4437(4)	1	4.84452
C25	C	4	0.3212(5)	0.9990(5)	0.4259(7)	1	4.84452
C26	C	4	0.3926(3)	0.9253(10)	0.4268(7)	1	4.84452
C27	C	4	0.1417(5)	0.9002(4)	0.4584(7)	1	4.84452
C28	C	4	0.0862(4)	0.9728(11)	0.4959(5)	1	4.84452
C29	C	4	0.1177(5)	1.1459(7)	0.3798(8)	1	4.84452
C30	C	4	0.1835(3)	1.0606(10)	0.3626(5)	1	4.84452
H12	H	4	0.6975	0.5229	0.2843	1	6
H4	H	4	0.2639	0.8806	0.3587	1	6
H8a	H	4	0.2751	0.8499	0.6219	1	6
H8b	H	4	0.2466	0.7581	0.5102	1	6
H12a	H	4	0.3173	1.0798	0.3707	1	6
H12b	H	4	0.3161	1.0369	0.5060	1	6
H16a	H	4	0.3471	0.7317	0.4406	1	6
H16b	H	4	0.3503	0.6726	0.5721	1	6
H20a	H	4	0.4301	0.9950	0.4540	1	6
H20b	H	4	0.4020	0.9026	0.3430	1	6
H40a	H	4	0.1387	0.8522	0.3806	1	6
H40b	H	4	0.1510	0.8273	0.5196	1	6
H42a	H	4	0.2212	1.1356	0.3702	1	6
H42b	H	4	0.1826	1.0231	0.2809	1	6
H48	H	4	0.4817	0.7363	0.3778	1	6
H61a	H	4	0.5688	0.7780	0.2945	1	6
H61b	H	4	0.6456	0.8224	0.3586	1	6
H61c	H	4	0.6419	0.7027	0.2578	1	6
H66a	H	4	0.5536	0.4757	0.3947	1	6
H66b	H	4	0.5150	0.5838	0.3020	1	6
H66c	H	4	0.5892	0.5091	0.2722	1	6
H69	H	4	0.5768	0.7617	0.7336	1	6
H80a	H	4	0.0877	1.0134	0.5767	1	6
H80b	H	4	0.0457	0.9035	0.4898	1	6
H82a	H	4	0.1046	1.2198	0.3209	1	6
H82b	H	4	0.1193	1.1926	0.4583	1	6
H89a	H	4	0.4934	0.9324	0.7696	1	6
H89b	H	4	0.4191	0.9333	0.6901	1	6
H97	H	4	0.7893	0.5690	0.6749	1	6
H101	H	4	0.8204	0.4618	0.3119	1	6
H10a	H	4	0.3912	0.7291	0.7481	1	6
H10b	H	4	0.4669	0.7181	0.8233	1	6
H10c	H	4	0.4075	0.8318	0.8595	1	6
H111	H	4	0.8933	0.5010	0.6231	1	6
H8	H	4	0.2014	1.0128	0.5187	1	6

#===============================================================================
 
# 10. MOLECULAR GEOMETRY
 
_geom_special_details
;
 Bond distances, angles etc. have been calculated using the
 rounded fractional coordinates. All su's are estimated
 from the variances of the (full) variance-covariance matrix.
 The cell esds are taken into account in the estimation of
 distances, angles and torsion angles
;

loop_
_geom_bond_atom_site_label_1
_geom_bond_atom_site_label_2
_geom_bond_distance
_geom_bond_site_symmetry_1
_geom_bond_site_symmetry_2
_geom_bond_publ_flag
 O1      C8        1.189(12)                     .       .                   yes
 O2      C28       1.452(12)                     .       .                   yes
 O2      C29       1.506(12)                     .       .                   yes
 N1      C1         1.358(8)                     .       .                   yes
 N1      C16        1.386(9)                     .       .                   yes
 N2      C17       1.206(14)                     .       .                   yes
 N3      C12        1.485(6)                     .       .                   yes
 N3      C22       1.539(10)                     .       .                   yes
 N3      C26       1.374(11)                     .       .                   yes
 N4      C24        1.612(7)                     .       .                   yes
 N4      C27       1.419(10)                     .       .                   yes
 N4      C30       1.409(10)                     .       .                   yes
 C1      C2        1.228(10)                     .       .                   no
 C1      C6         1.370(6)                     .       .                   no
 N1      H12          1.0400                     .       .                   no
 C2      C3         1.339(7)                     .       .                   no
 C3      C4         1.300(7)                     .       .                   no
 C3      C17        1.367(9)                     .       .                   no
 C4      C5         1.256(8)                     .       .                   no
 N4      H8           0.9100                     .       .                   no
 C5      C6         1.277(7)                     .       .                   no
 C6      C7         1.450(6)                     .       .                   no
 C7      C16        1.325(5)                     .       .                   no
 C7      C8         1.339(7)                     .       .                   no
 C8      C9         1.362(6)                     .       .                   no
 C9      C10        1.426(8)                     .       .                   no
 C9      C14        1.310(5)                     .       .                   no
 C10     C11        1.335(9)                     .       .                   no
 C11     C18       1.511(11)                     .       .                   no
 C11     C12        1.320(6)                     .       .                   no
 C12     C13        1.458(9)                     .       .                   no
 C13     C14       1.327(10)                     .       .                   no
 C14     C15        1.418(6)                     .       .                   no
 C15     C21       1.374(12)                     .       .                   no
 C15     C16        1.312(5)                     .       .                   no
 C15     C20       1.440(12)                     .       .                   no
 C18     C19       1.403(18)                     .       .                   no
 C22     C23       1.464(12)                     .       .                   no
 C23     C24        1.437(8)                     .       .                   no
 C24     C25       1.528(10)                     .       .                   no
 C25     C26       1.647(12)                     .       .                   no
 C27     C28       1.463(13)                     .       .                   no
 C29     C30       1.635(12)                     .       .                   no
 C2      H101         1.0900                     .       .                   no
 C4      H111         1.0900                     .       .                   no
 C5      H97          1.0900                     .       .                   no
 C10     H69          1.0900                     .       .                   no
 C13     H48          1.0900                     .       .                   no
 C18     H89A         1.1000                     .       .                   no
 C18     H89B         1.1000                     .       .                   no
 C19     H10A         1.1000                     .       .                   no
 C19     H10B         1.1000                     .       .                   no
 C19     H10C         1.1000                     .       .                   no
 C20     H66A         1.1000                     .       .                   no
 C20     H66B         1.1000                     .       .                   no
 C20     H66C         1.1000                     .       .                   no
 C21     H61A         1.0900                     .       .                   no
 C21     H61B         1.1000                     .       .                   no
 C21     H61C         1.1000                     .       .                   no
 C22     H16A         1.1100                     .       .                   no
 C22     H16B         1.1000                     .       .                   no
 C23     H8A          1.1000                     .       .                   no
 C23     H8B          1.1000                     .       .                   no
 C24     H4           1.1100                     .       .                   no
 C25     H12A         1.1000                     .       .                   no
 C25     H12B         1.1000                     .       .                   no
 C26     H20A         1.1000                     .       .                   no
 C26     H20B         1.1200                     .       .                   no
 C27     H40A         1.1100                     .       .                   no
 C27     H40B         1.1000                     .       .                   no
 C28     H80A         1.1100                     .       .                   no
 C28     H80B         1.1000                     .       .                   no
 C29     H82A         1.1000                     .       .                   no
 C29     H82B         1.1100                     .       .                   no
 C30     H42A         1.1000                     .       .                   no
 C30     H42B         1.1100                     .       .                   no

loop_
_geom_angle_atom_site_label_1
_geom_angle_atom_site_label_2
_geom_angle_atom_site_label_3
_geom_angle
_geom_angle_site_symmetry_1
_geom_angle_site_symmetry_2
_geom_angle_site_symmetry_3
_geom_angle_publ_flag
 C28     O2      C29        111.1(6)             .       .       .           yes
 C1      N1      C16        109.0(5)             .       .       .           yes
 C12     N3      C22        116.4(6)             .       .       .           yes
 C12     N3      C26        115.9(5)             .       .       .           yes
 C22     N3      C26        110.8(5)             .       .       .           yes
 C24     N4      C27        113.3(5)             .       .       .           yes
 C24     N4      C30        111.6(5)             .       .       .           yes
 C27     N4      C30        106.4(6)             .       .       .           yes
 N1      C1      C2         128.9(6)             .       .       .           yes
 N1      C1      C6         107.9(4)             .       .       .           yes
 C2      C1      C6         121.6(4)             .       .       .           no
 C16     N1      H12          129.00             .       .       .           no
 C1      N1      H12          122.00             .       .       .           no
 C1      C2      C3         116.5(4)             .       .       .           no
 C2      C3      C4         120.6(6)             .       .       .           no
 C2      C3      C17        119.5(4)             .       .       .           no
 C4      C3      C17        118.9(4)             .       .       .           no
 C3      C4      C5         119.7(5)             .       .       .           no
 C24     N4      H8           101.00             .       .       .           no
 C27     N4      H8           101.00             .       .       .           no
 C30     N4      H8           123.00             .       .       .           no
 C4      C5      C6         118.1(5)             .       .       .           no
 C1      C6      C5         119.3(5)             .       .       .           no
 C1      C6      C7         106.0(4)             .       .       .           no
 C5      C6      C7         134.6(5)             .       .       .           no
 C8      C7      C16        122.0(4)             .       .       .           no
 C6      C7      C16        107.3(4)             .       .       .           no
 C6      C7      C8         130.8(4)             .       .       .           no
 O1      C8      C7         122.3(5)             .       .       .           yes
 C7      C8      C9         114.9(4)             .       .       .           no
 O1      C8      C9         121.8(7)             .       .       .           yes
 C8      C9      C10        117.0(4)             .       .       .           no
 C10     C9      C14        119.9(4)             .       .       .           no
 C8      C9      C14        122.2(5)             .       .       .           no
 C9      C10     C11        122.2(5)             .       .       .           no
 C10     C11     C12        117.3(5)             .       .       .           no
 C10     C11     C18        120.2(5)             .       .       .           no
 C12     C11     C18        122.4(5)             .       .       .           no
 C11     C12     C13        119.3(5)             .       .       .           no
 N3      C12     C11        118.2(5)             .       .       .           yes
 N3      C12     C13        122.3(5)             .       .       .           yes
 C12     C13     C14        122.1(5)             .       .       .           no
 C9      C14     C15        122.7(4)             .       .       .           no
 C13     C14     C15        119.5(4)             .       .       .           no
 C9      C14     C13        117.5(5)             .       .       .           no
 C20     C15     C21        109.0(7)             .       .       .           no
 C14     C15     C21        109.6(6)             .       .       .           no
 C14     C15     C16        111.4(4)             .       .       .           no
 C14     C15     C20        111.0(5)             .       .       .           no
 C16     C15     C20        109.8(6)             .       .       .           no
 C16     C15     C21        106.0(5)             .       .       .           no
 N1      C16     C7         108.7(4)             .       .       .           yes
 N1      C16     C15        123.3(4)             .       .       .           yes
 C7      C16     C15        125.5(4)             .       .       .           no
 N2      C17     C3         179.5(6)             .       .       .           yes
 C11     C18     C19        112.3(8)             .       .       .           no
 N3      C22     C23        109.7(5)             .       .       .           yes
 C22     C23     C24        110.3(6)             .       .       .           no
 N4      C24     C25        110.6(4)             .       .       .           yes
 N4      C24     C23        112.1(5)             .       .       .           yes
 C23     C24     C25        108.6(6)             .       .       .           no
 C24     C25     C26        111.8(5)             .       .       .           no
 N3      C26     C25        109.0(6)             .       .       .           yes
 N4      C27     C28        109.7(5)             .       .       .           yes
 O2      C28     C27        111.8(6)             .       .       .           yes
 O2      C29     C30        112.5(6)             .       .       .           yes
 N4      C30     C29        109.5(5)             .       .       .           yes
 C1      C2      H101         122.00             .       .       .           no
 C3      C2      H101         121.00             .       .       .           no
 C3      C4      H111         118.00             .       .       .           no
 C5      C4      H111         120.00             .       .       .           no
 C4      C5      H97          121.00             .       .       .           no
 C6      C5      H97          119.00             .       .       .           no
 C9      C10     H69          116.00             .       .       .           no
 C11     C10     H69          120.00             .       .       .           no
 C12     C13     H48          117.00             .       .       .           no
 C14     C13     H48          121.00             .       .       .           no
 C11     C18     H89A         110.00             .       .       .           no
 C11     C18     H89B         110.00             .       .       .           no
 C19     C18     H89A         109.00             .       .       .           no
 C19     C18     H89B         107.00             .       .       .           no
 H89A    C18     H89B         108.00             .       .       .           no
 C18     C19     H10A         110.00             .       .       .           no
 C18     C19     H10B         109.00             .       .       .           no
 C18     C19     H10C         114.00             .       .       .           no
 H10A    C19     H10B         108.00             .       .       .           no
 H10A    C19     H10C         109.00             .       .       .           no
 H10B    C19     H10C         108.00             .       .       .           no
 C15     C20     H66A         105.00             .       .       .           no
 C15     C20     H66B         115.00             .       .       .           no
 C15     C20     H66C         112.00             .       .       .           no
 H66A    C20     H66B         109.00             .       .       .           no
 H66A    C20     H66C         109.00             .       .       .           no
 H66B    C20     H66C         107.00             .       .       .           no
 C15     C21     H61A         104.00             .       .       .           no
 C15     C21     H61B         117.00             .       .       .           no
 C15     C21     H61C         111.00             .       .       .           no
 H61A    C21     H61B         109.00             .       .       .           no
 H61A    C21     H61C         108.00             .       .       .           no
 H61B    C21     H61C         109.00             .       .       .           no
 N3      C22     H16A          89.00             .       .       .           no
 N3      C22     H16B         117.00             .       .       .           no
 C23     C22     H16A         111.00             .       .       .           no
 C23     C22     H16B         119.00             .       .       .           no
 H16A    C22     H16B         107.00             .       .       .           no
 C22     C23     H8A          110.00             .       .       .           no
 C22     C23     H8B           97.00             .       .       .           no
 C24     C23     H8A          133.00             .       .       .           no
 C24     C23     H8B           90.00             .       .       .           no
 H8A     C23     H8B          108.00             .       .       .           no
 N4      C24     H4           102.00             .       .       .           no
 C23     C24     H4           132.00             .       .       .           no
 C25     C24     H4            89.00             .       .       .           no
 C24     C25     H12A         124.00             .       .       .           no
 C24     C25     H12B          89.00             .       .       .           no
 C26     C25     H12A         113.00             .       .       .           no
 C26     C25     H12B         107.00             .       .       .           no
 H12A    C25     H12B         108.00             .       .       .           no
 N3      C26     H20A          94.00             .       .       .           no
 N3      C26     H20B         131.00             .       .       .           no
 C25     C26     H20A         107.00             .       .       .           no
 C25     C26     H20B         107.00             .       .       .           no
 H20A    C26     H20B         107.00             .       .       .           no
 N4      C27     H40A         103.00             .       .       .           no
 N4      C27     H40B         111.00             .       .       .           no
 C28     C27     H40A         121.00             .       .       .           no
 C28     C27     H40B         104.00             .       .       .           no
 H40A    C27     H40B         108.00             .       .       .           no
 O2      C28     H80A         111.00             .       .       .           no
 O2      C28     H80B         100.00             .       .       .           no
 C27     C28     H80A         121.00             .       .       .           no
 C27     C28     H80B         103.00             .       .       .           no
 H80A    C28     H80B         107.00             .       .       .           no
 O2      C29     H82A         117.00             .       .       .           no
 O2      C29     H82B          86.00             .       .       .           no
 C30     C29     H82A         118.00             .       .       .           no
 C30     C29     H82B         112.00             .       .       .           no
 H82A    C29     H82B         107.00             .       .       .           no
 N4      C30     H42A         104.00             .       .       .           no
 N4      C30     H42B         122.00             .       .       .           no
 C29     C30     H42A         100.00             .       .       .           no
 C29     C30     H42B         110.00             .       .       .           no
 H42A    C30     H42B         108.00             .       .       .           no

loop_
_geom_torsion_atom_site_label_1
_geom_torsion_atom_site_label_2
_geom_torsion_atom_site_label_3
_geom_torsion_atom_site_label_4
_geom_torsion
_geom_torsion_site_symmetry_1
_geom_torsion_site_symmetry_2
_geom_torsion_site_symmetry_3
_geom_torsion_site_symmetry_4
_geom_torsion_publ_flag
 C29     O2      C28     C27       -49.2(10)     .       .       .       .   no
 C28     O2      C29     C30        39.3(10)     .       .       .       .   no
 C16     N1      C1      C2        172.5(11)     .       .       .       .   no
 C16     N1      C1      C6          7.1(14)     .       .       .       .   no
 C1      N1      C16     C7         -0.4(13)     .       .       .       .   no
 C1      N1      C16     C15        162.5(8)     .       .       .       .   no
 C22     N3      C12     C11        -92.4(7)     .       .       .       .   no
 C22     N3      C12     C13         92.8(9)     .       .       .       .   no
 C26     N3      C12     C11        134.7(7)     .       .       .       .   no
 C26     N3      C12     C13       -40.1(11)     .       .       .       .   no
 C12     N3      C22     C23        160.2(5)     .       .       .       .   no
 C26     N3      C22     C23        -64.6(8)     .       .       .       .   no
 C12     N3      C26     C25       -169.7(5)     .       .       .       .   no
 C22     N3      C26     C25         54.9(8)     .       .       .       .   no
 C27     N4      C24     C23        -64.1(7)     .       .       .       .   no
 C27     N4      C24     C25        174.6(6)     .       .       .       .   no
 C30     N4      C24     C23        175.9(6)     .       .       .       .   no
 C30     N4      C24     C25         54.6(7)     .       .       .       .   no
 C24     N4      C27     C28        163.4(6)     .       .       .       .   no
 C30     N4      C27     C28        -73.6(8)     .       .       .       .   no
 C24     N4      C30     C29       -174.5(5)     .       .       .       .   no
 C27     N4      C30     C29         61.5(8)     .       .       .       .   no
 N1      C1      C2      C3       -165.3(11)     .       .       .       .   no
 C6      C1      C2      C3         -1.7(15)     .       .       .       .   no
 N1      C1      C6      C5        166.4(11)     .       .       .       .   no
 N1      C1      C6      C7        -10.5(12)     .       .       .       .   no
 C2      C1      C6      C5         -0.2(16)     .       .       .       .   no
 C2      C1      C6      C7       -177.2(10)     .       .       .       .   no
 C1      C2      C3      C4         -9.0(13)     .       .       .       .   no
 C1      C2      C3      C17       -177.4(8)     .       .       .       .   no
 C2      C3      C4      C5         22.6(14)     .       .       .       .   no
 C17     C3      C4      C5        -169.0(9)     .       .       .       .   no
 C3      C4      C5      C6        -24.1(17)     .       .       .       .   no
 C4      C5      C6      C1         13.2(16)     .       .       .       .   no
 C4      C5      C6      C7       -170.9(10)     .       .       .       .   no
 C1      C6      C7      C8        -169.4(9)     .       .       .       .   no
 C1      C6      C7      C16         10.3(9)     .       .       .       .   no
 C5      C6      C7      C8         14.4(17)     .       .       .       .   no
 C5      C6      C7      C16      -165.9(11)     .       .       .       .   no
 C6      C7      C8      O1          8.5(15)     .       .       .       .   no
 C6      C7      C8      C9         177.2(8)     .       .       .       .   no
 C16     C7      C8      O1        -171.2(9)     .       .       .       .   no
 C16     C7      C8      C9         -2.5(11)     .       .       .       .   no
 C6      C7      C16     N1         -6.1(10)     .       .       .       .   no
 C6      C7      C16     C15       -168.5(5)     .       .       .       .   no
 C8      C7      C16     N1         173.7(9)     .       .       .       .   no
 C8      C7      C16     C15        11.3(11)     .       .       .       .   no
 O1      C8      C9      C10       -22.7(13)     .       .       .       .   no
 O1      C8      C9      C14        168.2(9)     .       .       .       .   no
 C7      C8      C9      C10        168.5(8)     .       .       .       .   no
 C7      C8      C9      C14        -0.6(11)     .       .       .       .   no
 C8      C9      C10     C11        175.0(9)     .       .       .       .   no
 C14     C9      C10     C11       -15.7(15)     .       .       .       .   no
 C8      C9      C14     C13       -178.1(9)     .       .       .       .   no
 C8      C9      C14     C15        -3.9(11)     .       .       .       .   no
 C10     C9      C14     C13        13.1(13)     .       .       .       .   no
 C10     C9      C14     C15       -172.7(8)     .       .       .       .   no
 C9      C10     C11     C12        11.1(14)     .       .       .       .   no
 C9      C10     C11     C18       -165.9(8)     .       .       .       .   no
 C10     C11     C12     N3         179.9(7)     .       .       .       .   no
 C10     C11     C12     C13        -5.1(11)     .       .       .       .   no
 C18     C11     C12     N3          -3.1(9)     .       .       .       .   no
 C18     C11     C12     C13        171.9(8)     .       .       .       .   no
 C10     C11     C18     C19       -79.9(13)     .       .       .       .   no
 C12     C11     C18     C19       103.3(12)     .       .       .       .   no
 N3      C12     C13     C14        178.2(8)     .       .       .       .   no
 C11     C12     C13     C14         3.4(15)     .       .       .       .   no
 C12     C13     C14     C9         -7.5(15)     .       .       .       .   no
 C12     C13     C14     C15        178.1(8)     .       .       .       .   no
 C9      C14     C15     C16         10.7(8)     .       .       .       .   no
 C9      C14     C15     C20        133.4(8)     .       .       .       .   no
 C9      C14     C15     C21       -106.2(8)     .       .       .       .   no
 C13     C14     C15     C16       -175.2(8)     .       .       .       .   no
 C13     C14     C15     C20       -52.5(10)     .       .       .       .   no
 C13     C14     C15     C21         67.9(9)     .       .       .       .   no
 C14     C15     C16     N1        -174.3(8)     .       .       .       .   no
 C14     C15     C16     C7         -14.4(7)     .       .       .       .   no
 C20     C15     C16     N1         62.3(10)     .       .       .       .   no
 C20     C15     C16     C7        -137.7(7)     .       .       .       .   no
 C21     C15     C16     N1        -55.2(10)     .       .       .       .   no
 C21     C15     C16     C7         104.7(7)     .       .       .       .   no
 N3      C22     C23     C24         65.9(8)     .       .       .       .   no
 C22     C23     C24     N4         176.8(5)     .       .       .       .   no
 C22     C23     C24     C25        -60.8(7)     .       .       .       .   no
 N4      C24     C25     C26        175.6(6)     .       .       .       .   no
 C23     C24     C25     C26         52.3(8)     .       .       .       .   no
 C24     C25     C26     N3         -51.3(9)     .       .       .       .   no
 N4      C27     C28     O2          67.4(9)     .       .       .       .   no
 O2      C29     C30     N4         -46.9(9)     .       .       .       .   no

loop_
_geom_hbond_atom_site_label_D
_geom_hbond_atom_site_label_H
_geom_hbond_atom_site_label_A
_geom_hbond_distance_DH
_geom_hbond_distance_HA
_geom_hbond_distance_DA
_geom_hbond_angle_DHA
_geom_hbond_site_symmetry_A
_geom_hbond_publ_flag
#
#D   H   A   D - H  H...A   D...A    D - H...A  symm(A)
#
N1      H12     Cl1         1.0400     2.2800  3.224(12)     149.00   3_666 yes
N4      H8      Cl1         0.9100     2.0300   2.929(9)     167.00   2_556 yes
   
loop_
    _pd_proc_point_id
    _pd_meas_2theta_scan
    _pd_meas_counts_total
    _pd_calc_intensity_total
    _pd_diff_intensity_total
1	3.50000	1820.0	1826.7659	-6.7659
2	3.51431	1759.0	1828.1573	-69.1573
3	3.52861	1744.0	1829.5479	-85.5479
4	3.54292	1759.0	1830.9376	-71.9376
5	3.55723	1864.0	1832.3265	31.6735
6	3.57153	1794.0	1833.7146	-39.7146
7	3.58584	1822.0	1835.1019	-13.1019
8	3.60014	1782.0	1836.4883	-54.4883
9	3.61445	1753.0	1837.8739	-84.8739
10	3.62876	1732.0	1839.2588	-107.2588
11	3.64306	1767.0	1840.6428	-73.6428
12	3.65737	1799.0	1842.0259	-43.0259
13	3.67168	1746.0	1843.4083	-97.4083
14	3.68598	1765.0	1844.7898	-79.7898
15	3.70029	1763.0	1846.1705	-83.1705
16	3.71460	1778.0	1847.5503	-69.5503
17	3.72890	1776.0	1848.9294	-72.9294
18	3.74321	1713.0	1850.3076	-137.3076
19	3.75752	1802.0	1851.685	-49.685
20	3.77182	1847.0	1853.0615	-6.0615
21	3.78613	1805.0	1854.4373	-49.4373
22	3.80043	1762.0	1855.8121	-93.8121
23	3.81474	1822.0	1857.1862	-35.1862
24	3.82905	1806.0	1858.5594	-52.5594
25	3.84335	1815.0	1859.9318	-44.9318
26	3.85766	1821.0	1861.3034	-40.3034
27	3.87197	1784.0	1862.6741	-78.6741
28	3.88627	1796.0	1864.044	-68.044
29	3.90058	1792.0	1865.413	-73.413
30	3.91489	1842.0	1866.7812	-24.7812
31	3.92919	1795.0	1868.1486	-73.1486
32	3.94350	1928.0	1869.5151	58.4849
33	3.95780	1833.0	1870.8808	-37.8808
34	3.97211	1749.0	1872.2457	-123.2457
35	3.98642	1825.0	1873.6097	-48.6097
36	4.00072	1850.0	1874.9728	-24.9728
37	4.01503	1821.0	1876.3351	-55.3351
38	4.02934	1805.0	1877.6966	-72.6966
39	4.04364	1827.0	1879.0572	-52.0572
40	4.05795	1789.0	1880.417	-91.417
41	4.07226	1847.0	1881.7759	-34.7759
42	4.08656	1701.0	1883.134	-182.134
43	4.10087	1798.0	1884.4913	-86.4913
44	4.11518	1816.0	1885.8476	-69.8476
45	4.12948	1814.0	1887.2032	-73.2032
46	4.14379	1869.0	1888.5579	-19.5579
47	4.15809	1863.0	1889.9117	-26.9117
48	4.17240	1862.0	1891.2647	-29.2647
49	4.18671	1836.0	1892.6168	-56.6168
50	4.20101	1870.0	1893.9681	-23.9681
51	4.21532	1861.0	1895.3185	-34.3185
52	4.22963	1854.0	1896.668	-42.668
53	4.24393	1984.0	1898.0167	85.9833
54	4.25824	1819.0	1899.3646	-80.3646
55	4.27255	1839.0	1900.7116	-61.7116
56	4.28685	1888.0	1902.0577	-14.0577
57	4.30116	1958.0	1903.403	54.597
58	4.31546	1967.0	1904.7474	62.2526
59	4.32977	1898.0	1906.0909	-8.0909
60	4.34408	1873.0	1907.4336	-34.4336
61	4.35838	1892.0	1908.7754	-16.7754
62	4.37269	1924.0	1910.1164	13.8836
63	4.38700	1908.0	1911.4565	-3.4565
64	4.40130	1888.0	1912.7957	-24.7957
65	4.41561	1925.0	1914.1341	10.8659
66	4.42992	1893.0	1915.4716	-22.4716
67	4.44422	1945.0	1916.8082	28.1918
68	4.45853	1905.0	1918.144	-13.144
69	4.47284	1892.0	1919.4789	-27.4789
70	4.48714	2000.0	1920.8129	79.1871
71	4.50145	1912.0	1922.1461	-10.1461
72	4.51575	1885.0	1923.4784	-38.4784
73	4.53006	1922.0	1924.8098	-2.8098
74	4.54437	1961.0	1926.1404	34.8596
75	4.55867	1868.0	1927.47	-59.47
76	4.57298	1886.0	1928.7988	-42.7988
77	4.58729	1904.0	1930.1268	-26.1268
78	4.60159	1869.0	1931.4538	-62.4538
79	4.61590	1924.0	1932.78	-8.78
80	4.63021	1918.0	1934.1053	-16.1053
81	4.64451	1988.0	1935.4297	52.5703
82	4.65882	1933.0	1936.7533	-3.7533
83	4.67312	1928.0	1938.076	-10.076
84	4.68743	1956.0	1939.3978	16.6022
85	4.70174	1982.0	1940.7187	41.2813
86	4.71604	1961.0	1942.0387	18.9613
87	4.73035	1921.0	1943.3579	-22.3579
88	4.74466	2008.0	1944.6762	63.3238
89	4.75896	1946.0	1945.9936	0.0064
90	4.77327	1946.0	1947.3101	-1.3101
91	4.78758	1933.0	1948.6257	-15.6257
92	4.80188	1930.0	1949.9405	-19.9405
93	4.81619	1991.0	1951.2543	39.7457
94	4.83050	2082.0	1952.5673	129.4327
95	4.84480	2032.0	1953.8794	78.1206
96	4.85911	1972.0	1955.1906	16.8094
97	4.87341	1956.0	1956.5009	-0.5009
98	4.88772	1944.0	1957.8103	-13.8103
99	4.90203	2006.0	1959.1189	46.8811
100	4.91633	2004.0	1960.4266	43.5734
101	4.93064	2040.0	1961.7333	78.2667
102	4.94495	2000.0	1963.0392	36.9608
103	4.95925	1958.0	1964.3442	-6.3442
104	4.97356	1993.0	1965.6483	27.3517
105	4.98787	1938.0	1966.9515	-28.9515
106	5.00217	2056.0	1968.2538	87.7462
107	5.01648	1970.0	1969.5552	0.4448
108	5.03078	1956.0	1970.8558	-14.8558
109	5.04509	1959.0	1972.1554	-13.1554
110	5.05940	1985.0	1973.4542	11.5458
111	5.07370	2007.0	1974.752	32.248
112	5.08801	2005.0	1976.049	28.951
113	5.10232	1993.0	1977.345	15.655
114	5.11662	2040.0	1978.6402	61.3598
115	5.13093	2071.0	1979.9344	91.0656
116	5.14524	1951.0	1981.2278	-30.2278
117	5.15954	2002.0	1982.5203	19.4797
118	5.17385	2076.0	1983.8119	92.1881
119	5.18816	2038.0	1985.1025	52.8975
120	5.20246	1983.0	1986.3923	-3.3923
121	5.21677	2047.0	1987.6812	59.3188
122	5.23107	2020.0	1988.9691	31.0309
123	5.24538	2018.0	1990.2562	27.7438
124	5.25969	1951.0	1991.5424	-40.5424
125	5.27399	1996.0	1992.8276	3.1724
126	5.28830	2068.0	1994.112	73.888
127	5.30261	2013.0	1995.3954	17.6046
128	5.31691	2065.0	1996.678	68.322
129	5.33122	2011.0	1997.9597	13.0403
130	5.34553	2138.0	1999.2404	138.7596
131	5.35983	2057.0	2000.5202	56.4798
132	5.37414	2134.0	2001.7992	132.2008
133	5.38844	2039.0	2003.0772	35.9228
134	5.40275	1999.0	2004.3543	-5.3543
135	5.41706	2078.0	2005.6305	72.3695
136	5.43136	2012.0	2006.9058	5.0942
137	5.44567	2076.0	2008.1802	67.8198
138	5.45998	2115.0	2009.4537	105.5463
139	5.47428	2092.0	2010.7263	81.2737
140	5.48859	2107.0	2011.9979	95.0021
141	5.50290	2082.0	2013.2687	68.7313
142	5.51720	2025.0	2014.5385	10.4615
143	5.53151	2146.0	2015.8075	130.1925
144	5.54582	2046.0	2017.0755	28.9245
145	5.56012	2018.0	2018.3426	-0.3426
146	5.57443	2083.0	2019.6088	63.3912
147	5.58873	2121.0	2020.8741	100.1259
148	5.60304	2069.0	2022.1384	46.8616
149	5.61735	2086.0	2023.4019	62.5981
150	5.63165	2070.0	2024.6644	45.3356
151	5.64596	2120.0	2025.9261	94.0739
152	5.66027	2061.0	2027.1868	33.8132
153	5.67457	2135.0	2028.4466	106.5534
154	5.68888	2156.0	2029.7054	126.2946
155	5.70319	2080.0	2030.9634	49.0366
156	5.71749	2090.0	2032.2204	57.7796
157	5.73180	2016.0	2033.4766	-17.4766
158	5.74610	2060.0	2034.7317	25.2683
159	5.76041	2067.0	2035.986	31.014
160	5.77472	2032.0	2037.2394	-5.2394
161	5.78902	2156.0	2038.4919	117.5081
162	5.80333	2113.0	2039.7434	73.2566
163	5.81764	2155.0	2040.994	114.006
164	5.83194	2066.0	2042.2437	23.7563
165	5.84625	2142.0	2043.4924	98.5076
166	5.86056	2209.0	2044.7403	164.2597
167	5.87486	2127.0	2045.9872	81.0128
168	5.88917	2181.0	2047.2332	133.7668
169	5.90348	2196.0	2048.4783	147.5217
170	5.91778	2083.0	2049.7224	33.2776
171	5.93209	2089.0	2050.9656	38.0344
172	5.94639	2123.0	2052.2079	70.7921
173	5.96070	2125.0	2053.4493	71.5507
174	5.97501	2187.0	2054.6898	132.3102
175	5.98931	2096.0	2055.9293	40.0707
176	6.00362	2205.0	2057.1679	147.8321
177	6.01793	2134.0	2058.4056	75.5944
178	6.03223	2120.0	2059.6423	60.3577
179	6.04654	2140.0	2060.8781	79.1219
180	6.06085	2104.0	2062.113	41.887
181	6.07515	2159.0	2063.347	95.653
182	6.08946	2126.0	2064.58	61.42
183	6.10376	2189.0	2065.8121	123.1879
184	6.11807	2181.0	2067.0433	113.9567
185	6.13238	2214.0	2068.2736	145.7264
186	6.14668	2205.0	2069.5029	135.4971
187	6.16099	2044.0	2070.7313	-26.7313
188	6.17530	2129.0	2071.9587	57.0413
189	6.18960	2191.0	2073.1853	117.8147
190	6.20391	2205.0	2074.4109	130.5891
191	6.21822	2153.0	2075.6355	77.3645
192	6.23252	2149.0	2076.8593	72.1407
193	6.24683	2160.0	2078.0821	81.9179
194	6.26114	2078.0	2079.3039	-1.3039
195	6.27544	2151.0	2080.5249	70.4751
196	6.28975	2214.0	2081.7449	132.2551
197	6.30405	2098.0	2082.964	15.036
198	6.31836	2149.0	2084.1821	64.8179
199	6.33267	2064.0	2085.3993	-21.3993
200	6.34697	2157.0	2086.6157	70.3843
201	6.36128	2148.0	2087.8312	60.1688
202	6.37559	2143.0	2089.0459	53.9541
203	6.38989	2100.0	2090.2599	9.7401
204	6.40420	2171.0	2091.4734	79.5266
205	6.41851	2220.0	2092.6865	127.3135
206	6.43281	2117.0	2093.8995	23.1005
207	6.44712	2244.0	2095.1126	148.8874
208	6.46142	2214.0	2096.3262	117.6738
209	6.47573	2281.0	2097.5409	183.4591
210	6.49004	2196.0	2098.7571	97.2429
211	6.50434	2232.0	2099.9758	132.0242
212	6.51865	2189.0	2101.1979	87.8021
213	6.53296	2191.0	2102.4248	88.5752
214	6.54726	2150.0	2103.6583	46.3417
215	6.56157	2100.0	2104.9009	-4.9009
216	6.57588	2152.0	2106.1559	45.8441
217	6.59018	2143.0	2107.4288	35.5712
218	6.60449	2218.0	2108.727	109.273
219	6.61880	2173.0	2110.0621	62.9379
220	6.63310	2173.0	2111.4536	61.5464
221	6.64741	2304.0	2112.9445	191.0555
222	6.66171	2267.0	2114.653	152.347
223	6.67602	2241.0	2116.546	124.454
224	6.69033	2247.0	2118.0597	128.9403
225	6.70463	2205.0	2119.3383	85.6617
226	6.71894	2155.0	2120.5911	34.4089
227	6.73325	2153.0	2121.8443	31.1557
228	6.74755	2095.0	2123.0991	-28.0991
229	6.76186	2250.0	2124.3559	125.6441
230	6.77617	2220.0	2125.6152	94.3848
231	6.79047	2320.0	2126.878	193.122
232	6.80478	2213.0	2128.1454	84.8546
233	6.81908	2267.0	2129.4191	137.5809
234	6.83339	2250.0	2130.701	119.299
235	6.84770	2316.0	2131.9939	184.0061
236	6.86200	2267.0	2133.3011	133.6989
237	6.87631	2203.0	2134.6271	68.3729
238	6.89062	2280.0	2135.9775	144.0225
239	6.90492	2305.0	2137.3597	167.6403
240	6.91923	2223.0	2138.7833	84.2167
241	6.93354	2290.0	2140.261	149.739
242	6.94784	2281.0	2141.8098	139.1902
243	6.96215	2349.0	2143.4537	205.5463
244	6.97646	2327.0	2145.2265	181.7735
245	6.99076	2300.0	2147.1789	152.8211
246	7.00507	2375.0	2149.3893	225.6107
247	7.01937	2275.0	2151.9894	123.0106
248	7.03368	2342.0	2155.2474	186.7526
249	7.04799	2275.0	2159.4587	115.5413
250	7.06229	2161.0	2164.9661	-3.9661
251	7.07660	2242.0	2171.73	70.27
252	7.09091	2301.0	2175.7467	125.2533
253	7.10521	2323.0	2177.8547	145.1453
254	7.11952	2233.0	2179.7681	53.2319
255	7.13383	2187.0	2181.7078	5.2922
256	7.14813	2192.0	2183.6847	8.3153
257	7.16244	2169.0	2185.7033	-16.7033
258	7.17674	2228.0	2187.769	40.231
259	7.19105	2245.0	2189.8886	55.1114
260	7.20536	2241.0	2192.0706	48.9294
261	7.21966	2166.0	2194.3257	-28.3257
262	7.23397	2251.0	2196.6682	54.3318
263	7.24828	2289.0	2199.1168	89.8832
264	7.26258	2191.0	2201.6986	-10.6986
265	7.27689	2302.0	2204.4521	97.5479
266	7.29120	2258.0	2207.4349	50.5651
267	7.30550	2244.0	2210.7474	33.2526
268	7.31981	2253.0	2214.6189	38.3811
269	7.33412	2281.0	2219.4176	61.5824
270	7.34842	2247.0	2224.5287	22.4713
271	7.36273	2179.0	2228.2234	-49.2234
272	7.37703	2241.0	2231.986	9.014
273	7.39134	2263.0	2236.1329	26.8671
274	7.40565	2323.0	2240.8313	82.1687
275	7.41995	2284.0	2246.4163	37.5837
276	7.43426	2252.0	2253.7893	-1.7893
277	7.44857	2277.0	2262.7959	14.2041
278	7.46287	2234.0	2269.3171	-35.3171
279	7.47718	2264.0	2274.1661	-10.1661
280	7.49149	2261.0	2279.0266	-18.0266
281	7.50579	2203.0	2284.1349	-81.1349
282	7.52010	2247.0	2289.5265	-42.5265
283	7.53440	2239.0	2295.2345	-56.2345
284	7.54871	2214.0	2301.298	-87.298
285	7.56302	2352.0	2307.7632	44.2368
286	7.57732	2360.0	2314.6859	45.3141
287	7.59163	2270.0	2322.134	-52.134
288	7.60594	2347.0	2330.1919	16.8081
289	7.62024	2338.0	2338.9659	-0.9659
290	7.63455	2362.0	2348.5942	13.4058
291	7.64886	2403.0	2359.2577	43.7423
292	7.66316	2316.0	2371.1953	-55.1953
293	7.67747	2229.0	2384.735	-155.735
294	7.69178	2282.0	2400.3851	-118.3851
295	7.70608	2362.0	2418.8519	-56.8519
296	7.72039	2285.0	2439.9465	-154.9465
297	7.73469	2402.0	2462.4537	-60.4537
298	7.74900	2399.0	2488.3893	-89.3893
299	7.76331	2314.0	2518.7318	-204.7318
300	7.77761	2322.0	2554.4142	-232.4142
301	7.79192	2443.0	2596.5629	-153.5629
302	7.80623	2471.0	2646.5573	-175.5573
303	7.82053	2513.0	2706.0979	-193.0979
304	7.83484	2514.0	2777.2951	-263.2951
305	7.84915	2601.0	2862.7836	-261.7836
306	7.86345	2728.0	2965.8667	-237.8667
307	7.87776	2860.0	3090.6876	-230.6876
308	7.89206	2961.0	3242.4037	-281.4037
309	7.90637	2997.0	3427.2687	-430.2687
310	7.92068	3140.0	3652.3925	-512.3925
311	7.93498	3462.0	3924.6707	-462.6707
312	7.94929	3909.0	4247.6128	-338.6128
313	7.96360	4375.0	4612.9965	-237.9965
314	7.97790	4958.0	4982.8696	-24.8696
315	7.99221	5594.0	5267.5621	326.4379
316	8.00652	5955.0	5342.0297	612.9703
317	8.02082	5864.0	5142.0654	721.9346
318	8.03513	5001.0	4744.2864	256.7136
319	8.04944	4119.0	4304.3607	-185.3607
320	8.06374	3485.0	3941.4748	-456.4748
321	8.07805	3119.0	3693.7043	-574.7043
322	8.09235	3031.0	3548.1251	-517.1251
323	8.10666	2976.0	3480.2379	-504.2379
324	8.12097	3075.0	3471.151	-396.151
325	8.13527	3261.0	3509.8941	-248.8941
326	8.14958	3161.0	3591.6633	-430.6633
327	8.16389	3265.0	3715.9932	-450.9932
328	8.17819	3521.0	3885.6332	-364.6332
329	8.19250	3598.0	4106.3409	-508.3409
330	8.20681	3838.0	4386.5339	-548.5339
331	8.22111	4057.0	4737.5749	-680.5749
332	8.23542	4297.0	5174.2824	-877.2824
333	8.24972	4721.0	5715.7055	-994.7055
334	8.26403	5195.0	6386.182	-1191.182
335	8.27834	5926.0	7216.6527	-1290.6527
336	8.29264	6958.0	8246.0429	-1288.0429
337	8.30695	8083.0	9522.0657	-1439.0657
338	8.32126	9857.0	11099.7291	-1242.7291
339	8.33556	12067.0	13033.5312	-966.5312
340	8.34987	15346.0	15353.6249	-7.6249
341	8.36418	19814.0	18003.0895	1810.9105
342	8.37848	25656.0	20702.8238	4953.1762
343	8.39279	31216.0	22784.5092	8431.4908
344	8.40710	35064.0	23302.7713	11761.2287
345	8.42140	32283.0	21739.6828	10543.3172
346	8.43571	24545.0	18612.0901	5932.9099
347	8.45001	16049.0	15056.8595	992.1405
348	8.46432	10078.0	11993.5536	-1915.5536
349	8.47863	6846.0	9750.8159	-2904.8159
350	8.49293	5725.0	8247.7687	-2522.7687
351	8.50724	5105.0	7291.269	-2186.269
352	8.52155	5083.0	6720.4543	-1637.4543
353	8.53585	5213.0	6431.2535	-1218.2535
354	8.55016	5418.0	6364.1146	-946.1146
355	8.56447	5687.0	6489.6437	-802.6437
356	8.57877	6088.0	6798.7418	-710.7418
357	8.59308	6826.0	7294.6371	-468.6371
358	8.60738	7893.0	7983.7378	-90.7378
359	8.62169	9245.0	8858.0222	386.9778
360	8.63600	11110.0	9856.5883	1253.4117
361	8.65030	13741.0	10798.462	2942.538
362	8.66461	16399.0	11338.8818	5060.1182
363	8.67892	17372.0	11109.2401	6262.7599
364	8.69322	15090.0	10058.7159	5031.2841
365	8.70753	11050.0	8559.4848	2490.5152
366	8.72184	7119.0	7079.8499	39.1501
367	8.73614	4853.0	5893.7096	-1040.7096
368	8.75045	3985.0	5038.6186	-1053.6186
369	8.76476	3529.0	4441.3049	-912.3049
370	8.77906	3296.0	4020.2428	-724.2428
371	8.79337	3327.0	3716.0013	-389.0013
372	8.80767	3194.0	3489.9427	-295.9427
373	8.82198	3106.0	3317.4776	-211.4776
374	8.83629	3102.0	3182.7668	-80.7668
375	8.85059	3044.0	3075.366	-31.366
376	8.86490	3152.0	2988.2061	163.7939
377	8.87921	2918.0	2916.3788	1.6212
378	8.89351	2808.0	2856.3932	-48.3932
379	8.90782	2777.0	2805.7121	-28.7121
380	8.92213	2670.0	2762.4538	-92.4538
381	8.93643	2668.0	2725.1969	-57.1969
382	8.95074	2681.0	2692.8491	-11.8491
383	8.96504	2686.0	2664.5561	21.4439
384	8.97935	2618.0	2639.6361	-21.6361
385	8.99366	2651.0	2617.5209	33.4791
386	9.00796	2581.0	2597.675	-16.675
387	9.02227	2630.0	2579.7955	50.2045
388	9.03658	2651.0	2564.1494	86.8506
389	9.05088	2695.0	2550.3349	144.6651
390	9.06519	2504.0	2537.9508	-33.9508
391	9.07950	2575.0	2526.81	48.19
392	9.09380	2626.0	2516.7764	109.2236
393	9.10811	2638.0	2507.7371	130.2629
394	9.12242	2614.0	2499.5981	114.4019
395	9.13672	2677.0	2492.2819	184.7181
396	9.15103	2604.0	2485.7258	118.2742
397	9.16533	2558.0	2479.8812	78.1188
398	9.17964	2606.0	2474.7135	131.2865
399	9.19395	2577.0	2470.203	106.797
400	9.20825	2543.0	2466.3464	76.6536
401	9.22256	2625.0	2463.1588	161.8412
402	9.23687	2632.0	2460.6759	171.3241
403	9.25117	2599.0	2458.9561	140.0439
404	9.26548	2523.0	2458.0832	64.9168
405	9.27979	2614.0	2458.1694	155.8306
406	9.29409	2681.0	2459.3606	221.6394
407	9.30840	2529.0	2461.8397	67.1603
408	9.32270	2480.0	2465.8227	14.1773
409	9.33701	2586.0	2471.5194	114.4806
410	9.35132	2586.0	2479.3832	106.6168
411	9.36562	2571.0	2490.4771	80.5229
412	9.37993	2582.0	2505.2073	76.7927
413	9.39424	2602.0	2524.0612	77.9388
414	9.40854	2551.0	2547.3367	3.6633
415	9.42285	2625.0	2576.6269	48.3731
416	9.43716	2513.0	2617.3212	-104.3212
417	9.45146	2775.0	2668.8624	106.1376
418	9.46577	2771.0	2727.3896	43.6104
419	9.48008	2857.0	2784.3796	72.6204
420	9.49438	2919.0	2822.3098	96.6902
421	9.50869	2857.0	2820.5756	36.4244
422	9.52299	2770.0	2774.0294	-4.0294
423	9.53730	2637.0	2700.2615	-63.2615
424	9.55161	2630.0	2623.4047	6.5953
425	9.56591	2581.0	2559.7118	21.2882
426	9.58022	2527.0	2513.2092	13.7908
427	9.59453	2595.0	2480.7728	114.2272
428	9.60883	2452.0	2458.0785	-6.0785
429	9.62314	2543.0	2441.781	101.219
430	9.63745	2446.0	2429.6073	16.3927
431	9.65175	2463.0	2420.0907	42.9093
432	9.66606	2418.0	2412.1256	5.8744
433	9.68036	2496.0	2404.7677	91.2323
434	9.69467	2475.0	2398.1968	76.8032
435	9.70898	2463.0	2393.7215	69.2785
436	9.72328	2476.0	2389.4099	86.5901
437	9.73759	2473.0	2384.0565	88.9435
438	9.75190	2549.0	2377.861	171.139
439	9.76620	2483.0	2374.9299	108.0701
440	9.78051	2453.0	2373.9017	79.0983
441	9.79482	2445.0	2373.3786	71.6214
442	9.80912	2464.0	2373.092	90.908
443	9.82343	2420.0	2372.9594	47.0406
444	9.83774	2422.0	2372.9349	49.0651
445	9.85204	2463.0	2372.9992	90.0008
446	9.86635	2599.0	2373.1353	225.8647
447	9.88065	2511.0	2373.3281	137.6719
448	9.89496	2367.0	2373.5628	-6.5628
449	9.90927	2496.0	2373.8243	122.1757
450	9.92357	2523.0	2374.0954	148.9046
451	9.93788	2613.0	2374.3542	238.6458
452	9.95219	2522.0	2374.5711	147.4289
453	9.96649	2490.0	2374.7027	115.2973
454	9.98080	2427.0	2374.6707	52.3293
455	9.99511	2412.0	2374.2853	37.7147
456	10.00941	2440.0	2373.2259	66.7741
457	10.02372	2408.0	2372.1216	35.8784
458	10.03802	2434.0	2372.6857	61.3143
459	10.05233	2375.0	2373.3817	1.6183
460	10.06664	2431.0	2374.1933	56.8067
461	10.08094	2399.0	2375.0257	23.9743
462	10.09525	2366.0	2375.8683	-9.8683
463	10.10956	2437.0	2376.7205	60.2795
464	10.12386	2333.0	2377.5814	-44.5814
465	10.13817	2387.0	2378.4504	8.5496
466	10.15248	2388.0	2379.3271	8.6729
467	10.16678	2428.0	2380.211	47.789
468	10.18109	2423.0	2381.1021	41.8979
469	10.19540	2513.0	2382.0003	130.9997
470	10.20970	2429.0	2382.906	46.094
471	10.22401	2468.0	2383.8198	84.1802
472	10.23831	2503.0	2384.7434	118.2566
473	10.25262	2563.0	2385.6798	177.3202
474	10.26693	2423.0	2386.6357	36.3643
475	10.28123	2407.0	2387.6302	19.3698
476	10.29554	2354.0	2388.6629	-34.6629
477	10.30985	2323.0	2389.6478	-66.6478
478	10.32415	2359.0	2390.5956	-31.5956
479	10.33846	2352.0	2391.5427	-39.5427
480	10.35277	2359.0	2392.494	-33.494
481	10.36707	2482.0	2393.4501	88.5499
482	10.38138	2419.0	2394.412	24.588
483	10.39568	2453.0	2395.381	57.619
484	10.40999	2372.0	2396.3594	-24.3594
485	10.42430	2256.0	2397.3502	-141.3502
486	10.43860	2444.0	2398.3579	45.6421
487	10.45291	2414.0	2399.3884	14.6116
488	10.46722	2386.0	2400.4503	-14.4503
489	10.48152	2421.0	2401.5555	19.4445
490	10.49583	2380.0	2402.7186	-22.7186
491	10.51014	2405.0	2403.9569	1.0431
492	10.52444	2432.0	2405.3633	26.6367
493	10.53875	2367.0	2407.1789	-40.1789
494	10.55306	2393.0	2409.6141	-16.6141
495	10.56736	2437.0	2413.297	23.703
496	10.58167	2388.0	2417.5874	-29.5874
497	10.59597	2391.0	2419.3104	-28.3104
498	10.61028	2470.0	2420.7026	49.2974
499	10.62459	2482.0	2422.1255	59.8745
500	10.63889	2503.0	2423.6014	79.3986
501	10.65320	2500.0	2425.1434	74.8566
502	10.66751	2429.0	2426.7722	2.2278
503	10.68181	2398.0	2428.5251	-30.5251
504	10.69612	2502.0	2430.4273	71.5727
505	10.71043	2524.0	2432.4289	91.5711
506	10.72473	2437.0	2434.5953	2.4047
507	10.73904	2495.0	2437.0557	57.9443
508	10.75334	2399.0	2440.0108	-41.0108
509	10.76765	2450.0	2443.4826	6.5174
510	10.78196	2446.0	2446.8783	-0.8783
511	10.79626	2509.0	2450.657	58.343
512	10.81057	2391.0	2455.0988	-64.0988
513	10.82488	2496.0	2460.4041	35.5959
514	10.83918	2488.0	2466.8105	21.1895
515	10.85349	2535.0	2474.6116	60.3884
516	10.86780	2484.0	2484.2291	-0.2291
517	10.88210	2535.0	2496.2494	38.7506
518	10.89641	2573.0	2511.0871	61.9129
519	10.91072	2653.0	2529.0914	123.9086
520	10.92502	2770.0	2549.9508	220.0492
521	10.93933	2767.0	2571.6709	195.3291
522	10.95363	2998.0	2589.5289	408.4711
523	10.96794	2956.0	2597.5788	358.4212
524	10.98225	2926.0	2592.4311	333.5689
525	10.99655	2768.0	2574.7889	193.2111
526	11.01086	2688.0	2553.431	134.569
527	11.02517	2534.0	2534.2916	-0.2916
528	11.03947	2490.0	2520.0453	-30.0453
529	11.05378	2470.0	2510.5949	-40.5949
530	11.06809	2511.0	2504.7675	6.2325
531	11.08239	2379.0	2501.4357	-122.4357
532	11.09670	2534.0	2499.8036	34.1964
533	11.11100	2484.0	2499.3644	-15.3644
534	11.12531	2445.0	2499.8111	-54.8111
535	11.13962	2436.0	2500.9837	-64.9837
536	11.15392	2515.0	2502.8882	12.1118
537	11.16823	2466.0	2505.3873	-39.3873
538	11.18254	2422.0	2507.7339	-85.7339
539	11.19684	2477.0	2510.2333	-33.2333
540	11.21115	2478.0	2512.9952	-34.9952
541	11.22546	2490.0	2516.0198	-26.0198
542	11.23976	2492.0	2519.3035	-27.3035
543	11.25407	2498.0	2522.8491	-24.8491
544	11.26838	2586.0	2526.6651	59.3349
545	11.28268	2567.0	2530.7657	36.2343
546	11.29699	2502.0	2535.1703	-33.1703
547	11.31129	2436.0	2539.9042	-103.9042
548	11.32560	2520.0	2544.999	-24.999
549	11.33991	2443.0	2550.4939	-107.4939
550	11.35421	2552.0	2556.4372	-4.4372
551	11.36852	2493.0	2562.8886	-69.8886
552	11.38283	2514.0	2569.9228	-55.9228
553	11.39713	2456.0	2577.6339	-121.6339
554	11.41144	2506.0	2586.142	-80.142
555	11.42575	2503.0	2595.6004	-92.6004
556	11.44005	2536.0	2606.2051	-70.2051
557	11.45436	2605.0	2618.2054	-13.2054
558	11.46866	2582.0	2631.9163	-49.9163
559	11.48297	2598.0	2647.7357	-49.7357
560	11.49728	2577.0	2666.1661	-89.1661
561	11.51158	2622.0	2687.8429	-65.8429
562	11.52589	2717.0	2713.5723	3.4277
563	11.54020	2735.0	2744.3759	-9.3759
564	11.55450	2883.0	2781.5352	101.4648
565	11.56881	2880.0	2826.6075	53.3925
566	11.58312	2995.0	2881.327	113.673
567	11.59742	2981.0	2947.173	33.827
568	11.61173	3197.0	3024.1327	172.8673
569	11.62604	3299.0	3108.0366	190.9634
570	11.64034	3322.0	3187.3342	134.6658
571	11.65465	3492.0	3245.2608	246.7392
572	11.66895	3380.0	3272.729	107.271
573	11.68326	3396.0	3278.1618	117.8382
574	11.69757	3241.0	3280.2589	-39.2589
575	11.71187	3307.0	3298.195	8.805
576	11.72618	3236.0	3346.3154	-110.3154
577	11.74049	3262.0	3432.7048	-170.7048
578	11.75479	3405.0	3562.662	-157.662
579	11.76910	3553.0	3742.944	-189.944
580	11.78341	3759.0	3983.9506	-224.9506
581	11.79771	4138.0	4300.6952	-162.6952
582	11.81202	4511.0	4713.6496	-202.6496
583	11.82632	5055.0	5249.754	-194.754
584	11.84063	5964.0	5943.2636	20.7364
585	11.85494	7100.0	6835.1293	264.8707
586	11.86924	8573.0	7967.249	605.751
587	11.88355	10984.0	9362.6528	1621.3472
588	11.89786	14111.0	10974.4776	3136.5224
589	11.91216	17635.0	12590.1781	5044.8219
590	11.92647	20575.0	13755.2378	6819.7622
591	11.94078	20667.0	13945.8373	6721.1627
592	11.95508	17867.0	13036.6931	4830.3069
593	11.96939	14087.0	11419.1941	2667.8059
594	11.98370	10203.0	9594.3241	608.6759
595	11.99800	7218.0	7974.1491	-756.1491
596	12.01231	5699.0	6769.6254	-1070.6254
597	12.02661	4903.0	5975.1466	-1072.1466
598	12.04092	4943.0	5501.93	-558.93
599	12.05523	4998.0	5267.9278	-269.9278
600	12.06953	5412.0	5215.4901	196.5099
601	12.08384	6217.0	5297.7297	919.2703
602	12.09815	7092.0	5452.157	1639.843
603	12.11245	7953.0	5575.1534	2377.8466
604	12.12676	8178.0	5542.43	2635.57
605	12.14107	7583.0	5300.7293	2282.2707
606	12.15537	6304.0	4908.6266	1395.3734
607	12.16968	5139.0	4461.837	677.163
608	12.18398	4250.0	4046.5028	203.4972
609	12.19829	3515.0	3713.3786	-198.3786
610	12.21260	3214.0	3467.1844	-253.1844
611	12.22690	2984.0	3289.3792	-305.3792
612	12.24121	2982.0	3159.5347	-177.5347
613	12.25552	2856.0	3062.3935	-206.3935
614	12.26982	2907.0	2987.7825	-80.7825
615	12.28413	2875.0	2929.0696	-54.0696
616	12.29844	2806.0	2881.8804	-75.8804
617	12.31274	2766.0	2843.257	-77.257
618	12.32705	2789.0	2811.1598	-22.1598
619	12.34136	2775.0	2784.1752	-9.1752
620	12.35566	2703.0	2761.2276	-58.2276
621	12.36997	2618.0	2741.5377	-123.5377
622	12.38427	2683.0	2724.5122	-41.5122
623	12.39858	2717.0	2709.6492	7.3508
624	12.41289	2673.0	2696.58	-23.58
625	12.42719	2696.0	2685.059	10.941
626	12.44150	2702.0	2674.8801	27.1199
627	12.45581	2699.0	2665.8886	33.1114
628	12.47011	2573.0	2657.9814	-84.9814
629	12.48442	2517.0	2651.1079	-134.1079
630	12.49873	2612.0	2645.2807	-33.2807
631	12.51303	2710.0	2640.5976	69.4024
632	12.52734	2687.0	2637.29	49.71
633	12.54164	2714.0	2635.8422	78.1578
634	12.55595	2784.0	2637.2883	146.7117
635	12.57026	2861.0	2644.0738	216.9262
636	12.58456	2693.0	2663.2313	29.7687
637	12.59887	2836.0	2691.8522	144.1478
638	12.61318	2854.0	2694.7419	159.2581
639	12.62748	2830.0	2693.9872	136.0128
640	12.64179	2837.0	2693.3693	143.6307
641	12.65610	2594.0	2693.026	-99.026
642	12.67040	2651.0	2692.9359	-41.9359
643	12.68471	2710.0	2693.0675	16.9325
644	12.69902	2604.0	2693.4108	-89.4108
645	12.71332	2561.0	2694.0403	-133.0403
646	12.72763	2660.0	2694.9354	-34.9354
647	12.74193	2630.0	2696.0538	-66.0538
648	12.75624	2634.0	2697.3889	-63.3889
649	12.77055	2687.0	2698.9464	-11.9464
650	12.78485	2545.0	2700.7272	-155.7272
651	12.79916	2655.0	2702.6859	-47.6859
652	12.81347	2563.0	2704.8116	-141.8116
653	12.82777	2618.0	2707.1432	-89.1432
654	12.84208	2670.0	2709.7086	-39.7086
655	12.85639	2559.0	2712.5403	-153.5403
656	12.87069	2633.0	2715.6508	-82.6508
657	12.88500	2579.0	2719.0855	-140.0855
658	12.89930	2641.0	2722.9749	-81.9749
659	12.91361	2662.0	2727.4828	-65.4828
660	12.92792	2590.0	2732.8646	-142.8646
661	12.94222	2572.0	2739.5656	-167.5656
662	12.95653	2670.0	2748.4178	-78.4178
663	12.97084	2586.0	2761.3404	-175.3404
664	12.98514	2737.0	2786.0888	-49.0888
665	12.99945	2625.0	2822.9894	-197.9894
666	13.01376	2648.0	2834.8812	-186.8812
667	13.02806	2626.0	2843.2237	-217.2237
668	13.04237	2637.0	2851.8656	-214.8656
669	13.05668	2675.0	2860.9724	-185.9724
670	13.07098	2550.0	2870.5411	-320.5411
671	13.08529	2693.0	2880.5731	-187.5731
672	13.09959	2615.0	2891.0718	-276.0718
673	13.11390	2651.0	2902.0763	-251.0763
674	13.12821	2629.0	2913.6031	-284.6031
675	13.14251	2530.0	2925.643	-395.643
676	13.15682	2552.0	2938.1047	-386.1047
677	13.17113	2649.0	2951.0886	-302.0886
678	13.18543	2576.0	2965.3048	-389.3048
679	13.19974	2650.0	2980.4473	-330.4473
680	13.21405	2600.0	2996.4298	-396.4298
681	13.22835	2705.0	3013.2892	-308.2892
682	13.24266	2648.0	3031.0733	-383.0733
683	13.25696	2659.0	3049.8086	-390.8086
684	13.27127	2728.0	3069.4397	-341.4397
685	13.28558	2637.0	3089.772	-452.772
686	13.29988	2630.0	3110.3496	-480.3496
687	13.31419	2642.0	3132.0027	-490.0027
688	13.32850	2795.0	3157.9325	-362.9325
689	13.34280	2756.0	3185.8229	-429.8229
690	13.35711	2846.0	3215.8416	-369.8416
691	13.37142	2868.0	3248.029	-380.029
692	13.38572	2875.0	3282.5874	-407.5874
693	13.40003	2931.0	3319.7607	-388.7607
694	13.41434	3042.0	3359.8246	-317.8246
695	13.42864	3014.0	3403.0915	-389.0915
696	13.44295	3176.0	3449.9152	-273.9152
697	13.45725	3322.0	3500.6965	-178.6965
698	13.47156	3410.0	3555.8729	-145.8729
699	13.48587	3770.0	3615.8502	154.1498
700	13.50017	3861.0	3681.3198	179.6802
701	13.51448	4006.0	3753.7222	252.2778
702	13.52879	3863.0	3833.5504	29.4496
703	13.54309	3917.0	3921.793	-4.793
704	13.55740	4071.0	4019.6695	51.3305
705	13.57171	4030.0	4128.6921	-98.6921
706	13.58601	4277.0	4250.6863	26.3137
707	13.60032	4266.0	4387.8786	-121.8786
708	13.61462	4553.0	4542.9978	10.0022
709	13.62893	4788.0	4719.413	68.587
710	13.64324	5128.0	4921.3149	206.6851
711	13.65754	5391.0	5153.9547	237.0453
712	13.67185	5768.0	5423.9516	344.0484
713	13.68616	5916.0	5739.6593	176.3407
714	13.70046	6327.0	6111.5305	215.4695
715	13.71477	6781.0	6552.2947	228.7053
716	13.72908	7110.0	7076.7173	33.2827
717	13.74338	7179.0	7701.3868	-522.3868
718	13.75769	7452.0	8447.6318	-995.6318
719	13.77200	7782.0	9352.0359	-1570.0359
720	13.78630	8457.0	10477.957	-2020.957
721	13.80061	9275.0	11916.2419	-2641.2419
722	13.81491	10294.0	13786.1798	-3492.1798
723	13.82922	12113.0	16242.7207	-4129.7207
724	13.84353	14598.0	19485.4504	-4887.4504
725	13.85783	18474.0	23770.5799	-5296.5799
726	13.87214	24224.0	29425.1467	-5201.1467
727	13.88645	31832.0	36850.9631	-5018.9631
728	13.90075	42960.0	46488.1455	-3528.1455
729	13.91506	59240.0	58661.1737	578.8263
730	13.92937	80369.0	73143.1467	7225.8533
731	13.94367	106891.0	88261.0085	18629.9915
732	13.95798	131005.0	100016.7189	30988.2811
733	13.97228	141023.0	103449.7416	37573.2584
734	13.98659	132947.0	97146.291	35800.709
735	14.00090	109375.0	84357.9302	25017.0698
736	14.01520	80526.0	68667.2277	11858.7723
737	14.02951	54386.0	53124.323	1261.677
738	14.04382	34403.0	40260.6301	-5857.6301
739	14.05812	22401.0	30791.0445	-8390.0445
740	14.07243	16124.0	24131.3763	-8007.3763
741	14.08674	12998.0	19451.7445	-6453.7445
742	14.10104	11262.0	16102.0226	-4840.0226
743	14.11535	10680.0	13646.3072	-2966.3072
744	14.12966	9941.0	11803.4701	-1862.4701
745	14.14396	9405.0	10391.6819	-986.6819
746	14.15827	9013.0	9291.0118	-278.0118
747	14.17257	8400.0	8420.4582	-20.4582
748	14.18688	7690.0	7723.5068	-33.5068
749	14.20119	6864.0	7158.0359	-294.0359
750	14.21549	6053.0	6690.9001	-637.9001
751	14.22980	5391.0	6292.7703	-901.7703
752	14.24411	4827.0	5941.3393	-1114.3393
753	14.25841	4423.0	5625.63	-1202.63
754	14.27272	4169.0	5342.6396	-1173.6396
755	14.28703	3940.0	5091.195	-1151.195
756	14.30133	3815.0	4870.808	-1055.808
757	14.31564	3858.0	4680.4695	-822.4695
758	14.32994	3698.0	4517.1839	-819.1839
759	14.34425	3613.0	4377.0459	-764.0459
760	14.35856	3560.0	4256.6092	-696.6092
761	14.37286	3520.0	4153.2834	-633.2834
762	14.38717	3577.0	4065.1576	-488.1576
763	14.40148	3485.0	3990.5247	-505.5247
764	14.41578	3498.0	3927.0233	-429.0233
765	14.43009	3447.0	3870.4749	-423.4749
766	14.44440	3490.0	3814.726	-324.726
767	14.45870	3597.0	3754.5863	-157.5863
768	14.47301	3549.0	3689.7226	-140.7226
769	14.48732	3343.0	3623.5091	-280.5091
770	14.50162	3358.0	3559.2243	-201.2243
771	14.51593	3294.0	3499.6713	-205.6713
772	14.53023	3324.0	3446.8533	-122.8533
773	14.54454	3312.0	3400.9795	-88.9795
774	14.55885	3278.0	3361.2025	-83.2025
775	14.57315	3186.0	3326.5335	-140.5335
776	14.58746	3211.0	3295.5353	-84.5353
777	14.60177	3218.0	3266.9189	-48.9189
778	14.61607	3122.0	3240.8891	-118.8891
779	14.63038	3190.0	3217.2808	-27.2808
780	14.64469	3158.0	3196.0356	-38.0356
781	14.65899	3298.0	3177.519	120.481
782	14.67330	3134.0	3161.4092	-27.4092
783	14.68760	3152.0	3144.8003	7.1997
784	14.70191	3184.0	3129.2137	54.7863
785	14.71622	3129.0	3114.9098	14.0902
786	14.73052	3134.0	3101.8421	32.1579
787	14.74483	3091.0	3089.9606	1.0394
788	14.75914	3138.0	3079.2299	58.7701
789	14.77344	3097.0	3069.6301	27.3699
790	14.78775	3130.0	3061.1559	68.8441
791	14.80206	3155.0	3053.815	101.185
792	14.81636	3103.0	3047.6439	55.3561
793	14.83067	3095.0	3042.7518	52.2482
794	14.84498	3029.0	3039.2472	-10.2472
795	14.85928	3088.0	3037.2364	50.7636
796	14.87359	3046.0	3036.9031	9.0969
797	14.88789	3065.0	3038.5075	26.4925
798	14.90220	3143.0	3042.4118	100.5882
799	14.91651	3137.0	3049.128	87.872
800	14.93081	3007.0	3059.3893	-52.3893
801	14.94512	3073.0	3074.2707	-1.2707
802	14.95943	3068.0	3095.1494	-27.1494
803	14.97373	3128.0	3123.2861	4.7139
804	14.98804	3135.0	3160.4048	-25.4048
805	15.00235	3086.0	3208.5012	-122.5012
806	15.01665	3242.0	3266.2238	-24.2238
807	15.03096	3255.0	3343.5538	-88.5538
808	15.04526	3451.0	3482.8384	-31.8384
809	15.05957	3669.0	3669.5894	-0.5894
810	15.07388	3956.0	3904.0209	51.9791
811	15.08818	4344.0	4174.239	169.761
812	15.10249	4931.0	4434.3089	496.6911
813	15.11680	5388.0	4607.8962	780.1038
814	15.13110	5412.0	4626.1909	785.8091
815	15.14541	5131.0	4492.0346	638.9654
816	15.15972	4862.0	4265.2549	596.7451
817	15.17402	4331.0	3999.1482	331.8518
818	15.18833	3985.0	3738.6352	246.3648
819	15.20264	3708.0	3522.9004	185.0996
820	15.21694	3380.0	3364.656	15.344
821	15.23125	3458.0	3255.1987	202.8013
822	15.24555	3304.0	3180.9359	123.0641
823	15.25986	3345.0	3130.9492	214.0508
824	15.27417	3346.0	3097.8804	248.1196
825	15.28847	3263.0	3077.0248	185.9752
826	15.30278	3218.0	3065.4267	152.5733
827	15.31709	3118.0	3061.1903	56.8097
828	15.33139	3384.0	3062.1246	321.8754
829	15.34570	3189.0	3060.2639	128.7361
830	15.36001	3126.0	3057.3387	68.6613
831	15.37431	3131.0	3092.027	38.973
832	15.38862	3250.0	3142.26	107.74
833	15.40292	3217.0	3212.1613	4.8387
834	15.41723	3208.0	3306.0982	-98.0982
835	15.43154	3232.0	3432.5511	-200.5511
836	15.44584	3409.0	3602.2743	-193.2743
837	15.46015	3696.0	3829.2788	-133.2788
838	15.47446	4030.0	4130.3759	-100.3759
839	15.48876	4395.0	4522.3493	-127.3493
840	15.50307	5098.0	5012.4555	85.5445
841	15.51738	6045.0	5575.4494	469.5506
842	15.53168	7370.0	6118.8065	1251.1935
843	15.54599	8465.0	6478.3315	1986.6685
844	15.56030	8485.0	6513.6961	1971.3039
845	15.57460	7593.0	6237.1407	1355.8593
846	15.58891	6737.0	5772.6044	964.3956
847	15.60321	5609.0	5224.8434	384.1566
848	15.61752	4493.0	4681.5946	-188.5946
849	15.63183	3962.0	4225.0256	-263.0256
850	15.64613	3576.0	3885.7758	-309.7758
851	15.66044	3306.0	3648.0461	-342.0461
852	15.67475	3249.0	3483.8892	-234.8892
853	15.68905	3250.0	3370.297	-120.297
854	15.70336	3265.0	3291.8008	-26.8008
855	15.71767	3228.0	3239.0835	-11.0835
856	15.73197	3165.0	3206.2038	-41.2038
857	15.74628	3275.0	3186.6711	88.3289
858	15.76058	3232.0	3177.214	54.786
859	15.77489	3271.0	3174.1501	96.8499
860	15.78920	3262.0	3179.2234	82.7766
861	15.80350	3267.0	3192.5904	74.4096
862	15.81781	3370.0	3214.5926	155.4074
863	15.83212	3224.0	3246.1586	-22.1586
864	15.84642	3272.0	3288.9301	-16.9301
865	15.86073	3186.0	3345.4575	-159.4575
866	15.87504	3255.0	3419.4975	-164.4975
867	15.88934	3335.0	3516.5227	-181.5227
868	15.90365	3328.0	3644.281	-316.281
869	15.91796	3422.0	3813.5728	-391.5728
870	15.93226	3552.0	4039.1817	-487.1817
871	15.94657	3727.0	4340.9555	-613.9555
872	15.96087	3855.0	4744.9167	-889.9167
873	15.97518	4397.0	5283.6848	-886.6848
874	15.98949	5000.0	5993.876	-993.876
875	16.00379	5896.0	6904.3378	-1008.3378
876	16.01810	7185.0	8004.1928	-819.1928
877	16.03241	8567.0	9172.404	-605.404
878	16.04671	10046.0	10110.4189	-64.4189
879	16.06102	11002.0	10446.815	555.185
880	16.07533	10900.0	10084.3657	815.6343
881	16.08963	9682.0	9274.5369	407.4631
882	16.10394	8483.0	8241.7671	241.2329
883	16.11824	6827.0	7132.4194	-305.4194
884	16.13255	5669.0	6135.3026	-466.3026
885	16.14686	4712.0	5367.3526	-655.3526
886	16.16116	4121.0	4824.353	-703.353
887	16.17547	3825.0	4454.4234	-629.4234
888	16.18978	3772.0	4208.1424	-436.1424
889	16.20408	3744.0	4051.0624	-307.0624
890	16.21839	3678.0	3961.9093	-283.9093
891	16.23270	3771.0	3929.7515	-158.7515
892	16.24700	4013.0	3950.9333	62.0667
893	16.26131	4134.0	4027.2267	106.7733
894	16.27562	4272.0	4164.2908	107.7092
895	16.28992	4670.0	4368.8909	301.1091
896	16.30423	5286.0	4641.8619	644.1381
897	16.31853	6165.0	4962.5911	1202.4089
898	16.33284	7150.0	5267.9619	1882.0381
899	16.34715	7500.0	5456.2319	2043.7681
900	16.36145	7433.0	5453.8418	1979.1582
901	16.37576	6987.0	5282.747	1704.253
902	16.39007	6311.0	5016.384	1294.616
903	16.40437	5396.0	4708.2552	687.7448
904	16.41868	4777.0	4405.3478	371.6522
905	16.43299	4167.0	4155.7189	11.2811
906	16.44729	3976.0	3980.0177	-4.0177
907	16.46160	3762.0	3871.7772	-109.7772
908	16.47590	3741.0	3816.3652	-75.3652
909	16.49021	3717.0	3801.9656	-84.9656
910	16.50452	3915.0	3821.8432	93.1568
911	16.51882	3882.0	3874.2946	7.7054
912	16.53313	3882.0	3961.3694	-79.3694
913	16.54744	4010.0	4085.8557	-75.8557
914	16.56174	3974.0	4254.8173	-280.8173
915	16.57605	4140.0	4483.8179	-343.8179
916	16.59036	4453.0	4793.0056	-340.0056
917	16.60466	4694.0	5209.9769	-515.9769
918	16.61897	5157.0	5772.0679	-615.0679
919	16.63328	6008.0	6528.6686	-520.6686
920	16.64758	6973.0	7540.0194	-567.0194
921	16.66189	8607.0	8867.321	-260.321
922	16.67619	10875.0	10544.0365	330.9635
923	16.69050	13709.0	12499.2939	1209.7061
924	16.70481	17526.0	14435.7038	3090.2962
925	16.71911	19998.0	15792.9487	4205.0513
926	16.73342	20563.0	16055.3456	4507.6544
927	16.74773	18753.0	15240.453	3512.547
928	16.76203	16069.0	13791.6286	2277.3714
929	16.77634	13177.0	12032.1836	1144.8164
930	16.79065	10147.0	10189.0188	-42.0188
931	16.80495	7600.0	8558.9649	-958.9649
932	16.81926	6139.0	7320.1171	-1181.1171
933	16.83356	5413.0	6461.8302	-1048.8302
934	16.84787	5029.0	5897.6281	-868.6281
935	16.86218	4905.0	5545.8818	-640.8818
936	16.87648	5044.0	5351.5653	-307.5653
937	16.89079	5047.0	5284.8907	-237.8907
938	16.90510	5154.0	5330.9579	-176.9579
939	16.91940	5158.0	5475.279	-317.279
940	16.93371	5226.0	5686.369	-460.369
941	16.94802	5217.0	5900.347	-683.347
942	16.96232	5258.0	6041.9542	-783.9542
943	16.97663	5175.0	6099.8403	-924.8403
944	16.99094	4934.0	6145.3138	-1211.3138
945	17.00524	4963.0	6245.5439	-1282.5439
946	17.01955	5203.0	6452.2969	-1249.2969
947	17.03385	5585.0	6842.5834	-1257.5834
948	17.04816	6326.0	7495.1463	-1169.1463
949	17.06247	7453.0	8457.123	-1004.123
950	17.07677	9082.0	9718.4889	-636.4889
951	17.09108	11302.0	11143.1358	158.8642
952	17.10539	13505.0	12381.622	1123.378
953	17.11969	14309.0	12961.5791	1347.4209
954	17.13400	13626.0	12682.9102	943.0898
955	17.14831	12186.0	11793.4788	392.5212
956	17.16261	10146.0	10582.6918	-436.6918
957	17.17692	8245.0	9207.7796	-962.7796
958	17.19122	6660.0	7868.1795	-1208.1795
959	17.20553	5554.0	6758.6426	-1204.6426
960	17.21984	4922.0	5941.6833	-1019.6833
961	17.23414	4301.0	5375.7964	-1074.7964
962	17.24845	4449.0	4995.3668	-546.3668
963	17.26276	4278.0	4747.8897	-469.8897
964	17.27706	4084.0	4599.1481	-515.1481
965	17.29137	4060.0	4529.0611	-469.0611
966	17.30568	4201.0	4526.7987	-325.7987
967	17.31998	4204.0	4586.3838	-382.3838
968	17.33429	4442.0	4702.9037	-260.9037
969	17.34860	4473.0	4872.0417	-399.0417
970	17.36290	4663.0	5095.392	-432.392
971	17.37721	4948.0	5379.9124	-431.9124
972	17.39151	5286.0	5724.0848	-438.0848
973	17.40582	5994.0	6134.3087	-140.3087
974	17.42013	6710.0	6653.6261	56.3739
975	17.43443	7511.0	7359.7209	151.2791
976	17.44874	9079.0	8323.037	755.963
977	17.46305	10510.0	9578.3991	931.6009
978	17.47735	13032.0	11078.1182	1953.8818
979	17.49166	15263.0	12574.7868	2688.2132
980	17.50597	16561.0	13598.6976	2962.3024
981	17.52027	15732.0	13734.9279	1997.0721
982	17.53458	13876.0	13021.1688	854.8312
983	17.54888	11837.0	11825.1445	11.8555
984	17.56319	9691.0	10384.7919	-693.7919
985	17.57750	7445.0	8847.7839	-1402.7839
986	17.59180	6032.0	7446.5909	-1414.5909
987	17.60611	5171.0	6342.9096	-1171.9096
988	17.62042	4588.0	5541.0992	-953.0992
989	17.63472	4249.0	4971.72	-722.72
990	17.64903	3992.0	4564.3334	-572.3334
991	17.66334	3843.0	4268.4165	-425.4165
992	17.67764	3775.0	4050.0799	-275.0799
993	17.69195	3733.0	3881.6226	-148.6226
994	17.70626	3560.0	3747.7814	-187.7814
995	17.72056	3462.0	3641.1383	-179.1383
996	17.73487	3432.0	3555.1089	-123.1089
997	17.74917	3285.0	3484.8925	-199.8925
998	17.76348	3335.0	3427.6724	-92.6724
999	17.77779	3219.0	3381.8026	-162.8026
1000	17.79209	3215.0	3344.8796	-129.8796
1001	17.80640	3164.0	3312.1415	-148.1415
1002	17.82071	3071.0	3285.3436	-214.3436
1003	17.83501	3120.0	3263.3736	-143.3736
1004	17.84932	3035.0	3245.5661	-210.5661
1005	17.86363	3215.0	3231.5143	-16.5143
1006	17.87793	3118.0	3220.9893	-102.9893
1007	17.89224	3017.0	3214.0536	-197.0536
1008	17.90654	3008.0	3210.7323	-202.7323
1009	17.92085	3136.0	3210.1661	-74.1661
1010	17.93516	3140.0	3212.8882	-72.8882
1011	17.94946	3164.0	3220.3851	-56.3851
1012	17.96377	3088.0	3234.0708	-146.0708
1013	17.97808	3147.0	3252.123	-105.123
1014	17.99238	3163.0	3272.1754	-109.1754
1015	18.00669	2971.0	3298.8726	-327.8726
1016	18.02100	3230.0	3334.9265	-104.9265
1017	18.03530	3190.0	3383.5325	-193.5325
1018	18.04961	3161.0	3449.4708	-288.4708
1019	18.06392	3237.0	3540.077	-303.077
1020	18.07822	3323.0	3664.7193	-341.7193
1021	18.09253	3415.0	3834.481	-419.481
1022	18.10683	3623.0	4055.8332	-432.8332
1023	18.12114	3841.0	4339.1643	-498.1643
1024	18.13545	4270.0	4686.186	-416.186
1025	18.14975	4559.0	5062.0852	-503.0852
1026	18.16406	4794.0	5368.3783	-574.3783
1027	18.17837	5108.0	5486.7634	-378.7634
1028	18.19267	5122.0	5391.7987	-269.7987
1029	18.20698	4774.0	5173.4299	-399.4299
1030	18.22129	4504.0	4899.8153	-395.8153
1031	18.23559	4283.0	4586.5548	-303.5548
1032	18.24990	3918.0	4277.0391	-359.0391
1033	18.26420	3685.0	4023.2973	-338.2973
1034	18.27851	3523.0	3840.3615	-317.3615
1035	18.29282	3629.0	3716.8084	-87.8084
1036	18.30712	3654.0	3636.2113	17.7887
1037	18.32143	3743.0	3585.4787	157.5213
1038	18.33574	3801.0	3555.4062	245.5938
1039	18.35004	3800.0	3539.4957	260.5043
1040	18.36435	3765.0	3533.5981	231.4019
1041	18.37866	3721.0	3536.1436	184.8564
1042	18.39296	3638.0	3545.8902	92.1098
1043	18.40727	3742.0	3562.2895	179.7105
1044	18.42158	3833.0	3585.1216	247.8784
1045	18.43588	3805.0	3614.6453	190.3547
1046	18.45019	3739.0	3651.387	87.613
1047	18.46449	3906.0	3695.8065	210.1935
1048	18.47880	3943.0	3748.386	194.614
1049	18.49311	3964.0	3809.8629	154.1371
1050	18.50741	4153.0	3881.1135	271.8865
1051	18.52172	4235.0	3963.8199	271.1801
1052	18.53603	4345.0	4063.3055	281.6945
1053	18.55033	4346.0	4181.5887	164.4113
1054	18.56464	4608.0	4322.213	285.787
1055	18.57895	4555.0	4490.5058	64.4942
1056	18.59325	4722.0	4694.014	27.986
1057	18.60756	4877.0	4945.3357	-68.3357
1058	18.62186	5225.0	5263.4763	-38.4763
1059	18.63617	5549.0	5669.6543	-120.6543
1060	18.65048	6093.0	6196.8444	-103.8444
1061	18.66478	6825.0	6891.6367	-66.6367
1062	18.67909	7500.0	7817.5708	-317.5708
1063	18.69340	9103.0	9057.8918	45.1082
1064	18.70770	10901.0	10713.2755	187.7245
1065	18.72201	13156.0	12882.6183	273.3817
1066	18.73632	16229.0	15599.4943	629.5057
1067	18.75062	20247.0	18682.4756	1564.5244
1068	18.76493	23765.0	21544.7797	2220.2203
1069	18.77924	24975.0	23326.5565	1648.4435
1070	18.79354	23517.0	23593.5452	-76.5452
1071	18.80785	21384.0	22780.3935	-1396.3935
1072	18.82215	19607.0	21536.9153	-1929.9153
1073	18.83646	17335.0	20152.5962	-2817.5962
1074	18.85077	15596.0	18892.5286	-3296.5286
1075	18.86507	15507.0	18173.6239	-2666.6239
1076	18.87938	16500.0	18235.7875	-1735.7875
1077	18.89369	18307.0	19024.5164	-717.5164
1078	18.90799	21550.0	20411.0179	1138.9821
1079	18.92230	25699.0	22294.8114	3404.1886
1080	18.93661	30031.0	24353.2368	5677.7632
1081	18.95091	32158.0	25871.6806	6286.3194
1082	18.96522	31788.0	26217.8154	5570.1846
1083	18.97952	28731.0	25552.5897	3178.4103
1084	18.99383	26750.0	24627.8482	2122.1518
1085	19.00814	25725.0	23908.445	1816.555
1086	19.02244	24574.0	23572.003	1001.997
1087	19.03675	25674.0	23901.5683	1772.4317
1088	19.05106	28191.0	24957.2256	3233.7744
1089	19.06536	31144.0	26102.7481	5041.2519
1090	19.07967	31103.0	26282.8075	4820.1925
1091	19.09398	27572.0	25031.0339	2540.9661
1092	19.10828	23824.0	22875.5586	948.4414
1093	19.12259	20490.0	20363.5436	126.4564
1094	19.13690	16670.0	17572.0687	-902.0687
1095	19.15120	12688.0	14675.9175	-1987.9175
1096	19.16551	9644.0	12090.7429	-2446.7429
1097	19.17981	7837.0	10067.9879	-2230.9879
1098	19.19412	6805.0	8581.7603	-1776.7603
1099	19.20843	6155.0	7501.9545	-1346.9545
1100	19.22273	5664.0	6711.3893	-1047.3893
1101	19.23704	5531.0	6120.9617	-589.9617
1102	19.25135	5017.0	5670.3641	-653.3641
1103	19.26565	4870.0	5320.1568	-450.1568
1104	19.27996	4756.0	5045.2557	-289.2557
1105	19.29427	4541.0	4827.7496	-286.7496
1106	19.30857	4422.0	4655.6033	-233.6033
1107	19.32288	4258.0	4520.3511	-262.3511
1108	19.33718	4242.0	4415.3238	-173.3238
1109	19.35149	4238.0	4332.4342	-94.4342
1110	19.36580	4261.0	4260.1158	0.8842
1111	19.38010	4234.0	4186.1799	47.8201
1112	19.39441	4117.0	4106.9782	10.0218
1113	19.40872	4052.0	4028.526	23.474
1114	19.42302	3861.0	3954.5522	-93.5522
1115	19.43733	3905.0	3884.087	20.913
1116	19.45164	3803.0	3818.6848	-15.6848
1117	19.46594	3890.0	3762.155	127.845
1118	19.48025	3835.0	3716.0371	118.9629
1119	19.49456	3737.0	3679.4415	57.5585
1120	19.50886	3714.0	3650.2814	63.7186
1121	19.52317	3799.0	3626.5178	172.4822
1122	19.53747	3714.0	3606.8562	107.1438
1123	19.55178	3654.0	3591.1328	62.8672
1124	19.56609	3659.0	3578.9246	80.0754
1125	19.58039	3580.0	3569.7132	10.2868
1126	19.59470	3662.0	3563.3221	98.6779
1127	19.60901	3651.0	3560.5264	90.4736
1128	19.62331	3704.0	3560.5963	143.4037
1129	19.63762	3751.0	3563.4867	187.5133
1130	19.65193	3699.0	3569.153	129.847
1131	19.66623	3762.0	3577.6524	184.3476
1132	19.68054	3747.0	3589.0749	157.9251
1133	19.69484	3605.0	3603.5592	1.4408
1134	19.70915	3732.0	3621.2911	110.7089
1135	19.72346	3690.0	3642.5087	47.4913
1136	19.73776	3789.0	3667.5078	121.4922
1137	19.75207	3797.0	3696.6487	100.3513
1138	19.76638	3868.0	3730.3671	137.6329
1139	19.78068	3936.0	3769.189	166.811
1140	19.79499	3986.0	3813.7472	172.2528
1141	19.80930	4148.0	3864.7923	283.2077
1142	19.82360	4345.0	3923.1521	421.8479
1143	19.83791	4290.0	3989.5087	300.4913
1144	19.85222	4411.0	4064.228	346.772
1145	19.86652	4780.0	4148.8419	631.1581
1146	19.88083	4938.0	4250.6258	687.3742
1147	19.89513	4990.0	4372.4701	617.5299
1148	19.90944	5208.0	4515.7112	692.2888
1149	19.92375	5445.0	4684.865	760.135
1150	19.93805	5361.0	4886.3163	474.6837
1151	19.95236	5648.0	5128.4733	519.5267
1152	19.96667	5771.0	5422.2946	348.7054
1153	19.98097	5988.0	5783.746	204.254
1154	19.99528	6304.0	6236.3026	67.6974
1155	20.00959	6576.0	6812.9604	-236.9604
1156	20.02389	7187.0	7559.2315	-372.2315
1157	20.03820	8146.0	8536.4997	-390.4997
1158	20.05250	9268.0	9844.0102	-576.0102
1159	20.06681	11149.0	11622.9692	-473.9692
1160	20.08112	13755.0	14049.3369	-294.3369
1161	20.09542	17291.0	17344.3249	-53.3249
1162	20.10973	22378.0	21732.9726	645.0274
1163	20.12404	29739.0	27308.5954	2430.4046
1164	20.13834	39480.0	33715.6551	5764.3449
1165	20.15265	49509.0	39729.9529	9779.0471
1166	20.16696	54620.0	43407.0857	11212.9143
1167	20.18126	50726.0	43537.5161	7188.4839
1168	20.19557	43007.0	40909.6823	2097.3177
1169	20.20988	37546.0	37044.6144	501.3856
1170	20.22418	31840.0	32475.416	-635.416
1171	20.23849	24262.0	27312.1773	-3050.1773
1172	20.25279	17822.0	22231.8023	-4409.8023
1173	20.26710	14141.0	18001.4094	-3860.4094
1174	20.28141	12446.0	14828.2794	-2382.2794
1175	20.29571	11249.0	12508.1045	-1259.1045
1176	20.31002	10106.0	10790.9858	-684.9858
1177	20.32433	9343.0	9511.9498	-168.9498
1178	20.33863	8662.0	8550.0764	111.9236
1179	20.35294	7886.0	7814.3166	71.6834
1180	20.36725	7226.0	7261.8565	-35.8565
1181	20.38155	6736.0	6888.5998	-152.5998
1182	20.39586	6503.0	6699.7023	-196.7023
1183	20.41016	6205.0	6691.1192	-486.1192
1184	20.42447	6459.0	6867.9488	-408.9488
1185	20.43878	6626.0	7232.8341	-606.8341
1186	20.45308	7085.0	7758.0123	-673.0123
1187	20.46739	7778.0	8338.3069	-560.3069
1188	20.48170	8449.0	8788.5812	-339.5812
1189	20.49600	8770.0	8927.6504	-157.6504
1190	20.51031	8208.0	8717.0432	-509.0432
1191	20.52462	7649.0	8252.8316	-603.8316
1192	20.53892	6779.0	7660.2841	-881.2841
1193	20.55323	6273.0	6997.3747	-724.3747
1194	20.56754	5509.0	6306.4201	-797.4201
1195	20.58184	4910.0	5663.459	-753.459
1196	20.59615	4488.0	5136.0136	-648.0136
1197	20.61045	4236.0	4737.9584	-501.9584
1198	20.62476	4081.0	4444.2724	-363.2724
1199	20.63907	4024.0	4226.9013	-202.9013
1200	20.65337	3905.0	4063.1454	-158.1454
1201	20.66768	3868.0	3937.1507	-69.1507
1202	20.68199	3959.0	3838.4292	120.5708
1203	20.69629	3894.0	3760.1924	133.8076
1204	20.71060	4047.0	3698.0442	348.9558
1205	20.72491	3937.0	3648.2319	288.7681
1206	20.73921	3816.0	3607.4961	208.5039
1207	20.75352	3816.0	3575.521	240.479
1208	20.76782	3737.0	3551.9295	185.0705
1209	20.78213	3727.0	3536.1613	190.8387
1210	20.79644	3668.0	3527.4368	140.5632
1211	20.81074	3854.0	3527.6092	326.3908
1212	20.82505	3747.0	3538.5815	208.4185
1213	20.83936	3884.0	3563.2184	320.7816
1214	20.85366	3865.0	3605.5828	259.4172
1215	20.86797	3954.0	3670.9862	283.0138
1216	20.88228	4101.0	3765.5384	335.4616
1217	20.89658	4221.0	3889.7781	331.2219
1218	20.91089	4484.0	4024.6396	459.3604
1219	20.92520	4787.0	4140.8632	646.1368
1220	20.93950	5071.0	4193.7091	877.2909
1221	20.95381	5020.0	4170.353	849.647
1222	20.96811	4684.0	4103.5384	580.4616
1223	20.98242	4617.0	4022.7835	594.2165
1224	20.99673	4461.0	3928.7883	532.2117
1225	21.01103	4225.0	3823.0087	401.9913
1226	21.02534	4085.0	3724.0902	360.9098
1227	21.03965	3917.0	3648.2838	268.7162
1228	21.05395	3934.0	3596.673	337.327
1229	21.06826	3953.0	3566.4516	386.5484
1230	21.08257	4005.0	3553.2675	451.7325
1231	21.09687	4023.0	3554.0162	468.9838
1232	21.11118	3888.0	3566.9863	321.0137
1233	21.12548	4140.0	3590.3255	549.6745
1234	21.13979	4278.0	3624.6106	653.3894
1235	21.15410	4440.0	3671.9753	768.0247
1236	21.16840	4569.0	3734.9117	834.0883
1237	21.18271	4784.0	3816.1663	967.8337
1238	21.19702	4887.0	3916.8241	970.1759
1239	21.21132	5212.0	4033.1508	1178.8492
1240	21.22563	5365.0	4154.805	1210.195
1241	21.23994	5596.0	4267.8505	1328.1495
1242	21.25424	5495.0	4371.0792	1123.9208
1243	21.26855	5591.0	4484.4443	1106.5557
1244	21.28286	5575.0	4639.7715	935.2285
1245	21.29716	5504.0	4855.0916	648.9084
1246	21.31147	5539.0	5147.8857	391.1143
1247	21.32577	5756.0	5556.8852	199.1148
1248	21.34008	6253.0	6127.8212	125.1788
1249	21.35439	6930.0	6927.7473	2.2527
1250	21.36869	8198.0	8029.2639	168.7361
1251	21.38300	10425.0	9502.3785	922.6215
1252	21.39731	13938.0	11359.7771	2578.2229
1253	21.41161	18198.0	13436.077	4761.923
1254	21.42592	22154.0	15252.9615	6901.0385
1255	21.44023	24158.0	16157.6543	8000.3457
1256	21.45453	22784.0	15917.1133	6866.8867
1257	21.46884	20058.0	14983.5211	5074.4789
1258	21.48314	17770.0	13820.3014	3949.6986
1259	21.49745	15342.0	12459.8922	2882.1078
1260	21.51176	12470.0	10877.0189	1592.9811
1261	21.52606	9667.0	9305.2462	361.7538
1262	21.54037	7478.0	8007.8803	-529.8803
1263	21.55468	6348.0	7067.7121	-719.7121
1264	21.56898	5967.0	6440.4732	-473.4732
1265	21.58329	5531.0	6054.5099	-523.5099
1266	21.59760	5565.0	5857.7613	-292.7613
1267	21.61190	5846.0	5834.6829	11.3171
1268	21.62621	6082.0	5983.4708	98.5292
1269	21.64052	6428.0	6307.759	120.241
1270	21.65482	7163.0	6822.1421	340.8579
1271	21.66913	7772.0	7519.1387	252.8613
1272	21.68343	8942.0	8322.9849	619.0151
1273	21.69774	9892.0	9056.1069	835.8931
1274	21.71205	10265.0	9525.3772	739.6228
1275	21.72635	10015.0	9730.3908	284.6092
1276	21.74066	9867.0	9851.7373	15.2627
1277	21.75497	9525.0	9926.5857	-401.5857
1278	21.76927	9023.0	9769.0547	-746.0547
1279	21.78358	8437.0	9259.9971	-822.9971
1280	21.79789	7512.0	8542.5942	-1030.5942
1281	21.81219	6721.0	7842.0947	-1121.0947
1282	21.82650	6134.0	7230.5435	-1096.5435
1283	21.84080	5705.0	6661.4646	-956.4646
1284	21.85511	5296.0	6126.7543	-830.7543
1285	21.86942	5051.0	5682.5524	-631.5524
1286	21.88372	4732.0	5374.6969	-642.6969
1287	21.89803	4632.0	5205.3516	-573.3516
1288	21.91234	4685.0	5147.475	-462.475
1289	21.92664	4960.0	5188.8219	-228.8219
1290	21.94095	4977.0	5340.8766	-363.8766
1291	21.95526	5336.0	5621.6517	-285.6517
1292	21.96956	5569.0	6056.1125	-487.1125
1293	21.98387	6302.0	6669.9303	-367.9303
1294	21.99818	6962.0	7463.8698	-501.8698
1295	22.01248	7989.0	8355.0576	-366.0576
1296	22.02679	8775.0	9118.1779	-343.1779
1297	22.04109	8799.0	9466.3629	-667.3629
1298	22.05540	8412.0	9329.7974	-917.7974
1299	22.06971	7929.0	8946.5338	-1017.5338
1300	22.08401	7520.0	8516.1202	-996.1202
1301	22.09832	7139.0	8022.3548	-883.3548
1302	22.11263	6409.0	7439.5127	-1030.5127
1303	22.12693	5916.0	6876.7351	-960.7351
1304	22.14124	5721.0	6459.3063	-738.3063
1305	22.15555	5518.0	6231.7587	-713.7587
1306	22.16985	5607.0	6186.8865	-579.8865
1307	22.18416	5740.0	6312.8831	-572.8831
1308	22.19846	6030.0	6614.7701	-584.7701
1309	22.21277	6587.0	7120.9246	-533.9246
1310	22.22708	7520.0	7885.6834	-365.6834
1311	22.24138	8635.0	8989.9463	-354.9463
1312	22.25569	10335.0	10534.1321	-199.1321
1313	22.27000	12522.0	12606.0549	-84.0549
1314	22.28430	15820.0	15188.7064	631.2936
1315	22.29861	19311.0	17988.0467	1322.9533
1316	22.31292	22644.0	20315.7768	2328.2232
1317	22.32722	23542.0	21398.3103	2143.6897
1318	22.34153	22522.0	21104.3137	1417.6863
1319	22.35584	20422.0	20011.1903	410.8097
1320	22.37014	18479.0	18560.8738	-81.8738
1321	22.38445	15837.0	16775.6637	-938.6637
1322	22.39875	13140.0	14698.7851	-1558.7851
1323	22.41306	10801.0	12624.8274	-1823.8274
1324	22.42737	8692.0	10856.2762	-2164.2762
1325	22.44167	7439.0	9537.6535	-2098.6535
1326	22.45598	6870.0	8682.8235	-1812.8235
1327	22.47029	6542.0	8243.2757	-1701.2757
1328	22.48459	6412.0	8160.4557	-1748.4557
1329	22.49890	7194.0	8379.3463	-1185.3463
1330	22.51321	7860.0	8814.8898	-954.8898
1331	22.52751	9041.0	9301.3251	-260.3251
1332	22.54182	10443.0	9615.5867	827.4133
1333	22.55612	10712.0	9651.1482	1060.8518
1334	22.57043	10423.0	9535.7706	887.2294
1335	22.58474	10270.0	9430.4628	839.5372
1336	22.59904	10465.0	9315.7939	1149.2061
1337	22.61335	10119.0	9053.1766	1065.8234
1338	22.62766	9227.0	8584.26	642.74
1339	22.64196	8476.0	8010.6486	465.3514
1340	22.65627	7460.0	7489.4817	-29.4817
1341	22.67058	6995.0	7076.1574	-81.1574
1342	22.68488	6494.0	6721.9009	-227.9009
1343	22.69919	5977.0	6392.3219	-415.3219
1344	22.71350	5569.0	6120.8811	-551.8811
1345	22.72780	5582.0	5956.1278	-374.1278
1346	22.74211	5471.0	5916.1826	-445.1826
1347	22.75641	5305.0	5997.1127	-692.1127
1348	22.77072	5537.0	6193.9051	-656.9051
1349	22.78503	5849.0	6507.5183	-658.5183
1350	22.79933	6040.0	6948.0534	-908.0534
1351	22.81364	6608.0	7553.6741	-945.6741
1352	22.82795	7449.0	8399.5375	-950.5375
1353	22.84225	8678.0	9559.7905	-881.7905
1354	22.85656	10367.0	11032.6009	-665.6009
1355	22.87087	12064.0	12646.8653	-582.8653
1356	22.88517	13696.0	13972.0878	-276.0878
1357	22.89948	14691.0	14470.327	220.673
1358	22.91378	14241.0	14053.8286	187.1714
1359	22.92809	13313.0	13218.8294	94.1706
1360	22.94240	12333.0	12334.0675	-1.0675
1361	22.95670	11016.0	11323.8643	-307.8643
1362	22.97101	9887.0	10099.6565	-212.6565
1363	22.98532	8652.0	8854.2536	-202.2536
1364	22.99962	7586.0	7822.335	-236.335
1365	23.01393	6807.0	7075.4205	-268.4205
1366	23.02824	6594.0	6574.6269	19.3731
1367	23.04254	6508.0	6258.5058	249.4942
1368	23.05685	6522.0	6078.254	443.746
1369	23.07116	6448.0	6002.3646	445.6354
1370	23.08546	6561.0	6012.7302	548.2698
1371	23.09977	6750.0	6100.7749	649.2251
1372	23.11407	6648.0	6265.7907	382.2093
1373	23.12838	6846.0	6512.5697	333.4303
1374	23.14269	7106.0	6854.5413	251.4587
1375	23.15699	7202.0	7316.7479	-114.7479
1376	23.17130	7552.0	7936.2231	-384.2231
1377	23.18561	8103.0	8764.3757	-661.3757
1378	23.19991	8858.0	9876.8759	-1018.8759
1379	23.21422	10074.0	11380.2436	-1306.2436
1380	23.22853	12200.0	13414.1645	-1214.1645
1381	23.24283	15480.0	16135.9041	-655.9041
1382	23.25714	20376.0	19682.5023	693.4977
1383	23.27144	26904.0	24125.7072	2778.2928
1384	23.28575	33797.0	29452.5946	4344.4054
1385	23.30006	41096.0	35453.4948	5642.5052
1386	23.31436	48293.0	41279.5092	7013.4908
1387	23.32867	53751.0	45206.13	8544.87
1388	23.34298	54296.0	45820.2646	8475.7354
1389	23.35728	50440.0	43709.1975	6730.8025
1390	23.37159	44786.0	40753.3424	4032.6576
1391	23.38590	40313.0	37773.1427	2539.8573
1392	23.40020	35885.0	34289.9305	1595.0695
1393	23.41451	31207.0	30107.7783	1099.2217
1394	23.42882	26554.0	25829.1977	724.8023
1395	23.44312	22114.0	21978.1519	135.8481
1396	23.45743	18066.0	18679.1289	-613.1289
1397	23.47173	14928.0	15982.0883	-1054.0883
1398	23.48604	13262.0	13846.4031	-584.4031
1399	23.50035	11711.0	12085.423	-374.423
1400	23.51465	10252.0	10530.3276	-278.3276
1401	23.52896	8587.0	9176.4828	-589.4828
1402	23.54327	7776.0	8075.9752	-299.9752
1403	23.55757	6865.0	7223.6533	-358.6533
1404	23.57188	6412.0	6571.0822	-159.0822
1405	23.58619	5980.0	6066.328	-86.328
1406	23.60049	5602.0	5668.9416	-66.9416
1407	23.61480	5329.0	5350.3131	-21.3131
1408	23.62910	5146.0	5090.58	55.42
1409	23.64341	4918.0	4875.7826	42.2174
1410	23.65772	4655.0	4695.7342	-40.7342
1411	23.67202	4548.0	4543.1171	4.8829
1412	23.68633	4464.0	4413.9053	50.0947
1413	23.70064	4391.0	4304.0842	86.9158
1414	23.71494	4134.0	4209.9995	-75.9995
1415	23.72925	3998.0	4129.1188	-131.1188
1416	23.74356	4159.0	4059.0061	99.9939
1417	23.75786	3957.0	3997.4333	-40.4333
1418	23.77217	4042.0	3946.5293	95.4707
1419	23.78648	3847.0	3909.6977	-62.6977
1420	23.80078	3942.0	3884.5666	57.4334
1421	23.81509	3907.0	3872.8837	34.1163
1422	23.82939	3921.0	3875.6667	45.3333
1423	23.84370	4015.0	3896.8679	118.1321
1424	23.85801	3960.0	3939.5959	20.4041
1425	23.87231	4027.0	4005.9827	21.0173
1426	23.88662	4012.0	4091.0053	-79.0053
1427	23.90093	4226.0	4175.9767	50.0233
1428	23.91523	4188.0	4231.4185	-43.4185
1429	23.92954	4295.0	4241.187	53.813
1430	23.94385	4155.0	4223.171	-68.171
1431	23.95815	4144.0	4208.1132	-64.1132
1432	23.97246	4209.0	4205.81	3.19
1433	23.98676	4143.0	4206.8302	-63.8302
1434	24.00107	4147.0	4212.1737	-65.1737
1435	24.01538	4018.0	4235.9484	-217.9484
1436	24.02968	3961.0	4300.9898	-339.9898
1437	24.04399	4127.0	4434.8913	-307.8913
1438	24.05830	4262.0	4652.4811	-390.4811
1439	24.07260	4447.0	4953.7089	-506.7089
1440	24.08691	4853.0	5309.4692	-456.4692
1441	24.10122	5410.0	5635.5212	-225.5212
1442	24.11552	5858.0	5809.6036	48.3964
1443	24.12983	5970.0	5773.4666	196.5334
1444	24.14414	5404.0	5604.1091	-200.1091
1445	24.15844	5158.0	5409.2975	-251.2975
1446	24.17275	4982.0	5205.1855	-223.1855
1447	24.18705	4938.0	4950.0292	-12.0292
1448	24.20136	4745.0	4645.6288	99.3712
1449	24.21567	4329.0	4347.5333	-18.5333
1450	24.22997	4072.0	4101.6867	-29.6867
1451	24.24428	3922.0	3916.3425	5.6575
1452	24.25859	3836.0	3778.7368	57.2632
1453	24.27289	3822.0	3675.3747	146.6253
1454	24.28720	3900.0	3598.1343	301.8657
1455	24.30151	3765.0	3541.5511	223.4489
1456	24.31581	3794.0	3501.7512	292.2488
1457	24.33012	3790.0	3474.9148	315.0852
1458	24.34442	3682.0	3458.6238	223.3762
1459	24.35873	3814.0	3454.4855	359.5145
1460	24.37304	3704.0	3458.4986	245.5014
1461	24.38734	3774.0	3465.9397	308.0603
1462	24.40165	3759.0	3474.3218	284.6782
1463	24.41596	3847.0	3486.39	360.61
1464	24.43026	3657.0	3507.2739	149.7261
1465	24.44457	3773.0	3539.908	233.092
1466	24.45888	3941.0	3585.2671	355.7329
1467	24.47318	3916.0	3653.0452	262.9548
1468	24.48749	4058.0	3752.2427	305.7573
1469	24.50180	4176.0	3863.1679	312.8321
1470	24.51610	4460.0	3954.1429	505.8571
1471	24.53041	4385.0	3990.9623	394.0377
1472	24.54471	4479.0	3973.4595	505.5405
1473	24.55902	4287.0	3937.8085	349.1915
1474	24.57333	4254.0	3910.254	343.746
1475	24.58763	4168.0	3887.581	280.419
1476	24.60194	4277.0	3858.9868	418.0132
1477	24.61625	4145.0	3835.246	309.754
1478	24.63055	4016.0	3838.3386	177.6614
1479	24.64486	3992.0	3883.7993	108.2007
1480	24.65917	3936.0	3981.1993	-45.1993
1481	24.67347	4220.0	4140.4773	79.5227
1482	24.68778	4331.0	4375.0505	-44.0505
1483	24.70208	4599.0	4699.3149	-100.3149
1484	24.71639	4915.0	5116.853	-201.853
1485	24.73070	5378.0	5601.7257	-223.7257
1486	24.74500	5936.0	6089.9445	-153.9445
1487	24.75931	6591.0	6516.384	74.616
1488	24.77362	7478.0	6878.3565	599.6435
1489	24.78792	8553.0	7194.8723	1358.1277
1490	24.80223	9502.0	7380.4674	2121.5326
1491	24.81654	9665.0	7284.5014	2380.4986
1492	24.83084	8502.0	6919.5727	1582.4273
1493	24.84515	7725.0	6462.6201	1262.3799
1494	24.85946	7113.0	6035.5625	1077.4375
1495	24.87376	6782.0	5617.9202	1164.0798
1496	24.88807	6098.0	5170.9199	927.0801
1497	24.90237	5273.0	4731.1555	541.8445
1498	24.91668	4883.0	4358.3031	524.6969
1499	24.93099	4245.0	4074.4148	170.5852
1500	24.94529	4149.0	3867.9191	281.0809
1501	24.95960	4097.0	3718.7254	378.2746
1502	24.97391	4077.0	3609.8633	467.1367
1503	24.98821	3909.0	3529.3813	379.6187
1504	25.00252	4012.0	3469.2995	542.7005
1505	25.01683	3917.0	3424.3529	492.6471
1506	25.03113	3794.0	3391.0773	402.9227
1507	25.04544	3850.0	3367.2259	482.7741
1508	25.05974	3804.0	3351.5123	452.4877
1509	25.07405	3740.0	3343.3124	396.6876
1510	25.08836	3673.0	3341.4873	331.5127
1511	25.10266	3670.0	3345.3922	324.6078
1512	25.11697	3852.0	3354.5138	497.4862
1513	25.13128	3938.0	3368.1134	569.8866
1514	25.14558	3984.0	3386.7745	597.2255
1515	25.15989	3838.0	3413.3225	424.6775
1516	25.17420	3858.0	3451.7872	406.2128
1517	25.18850	3977.0	3506.3807	470.6193
1518	25.20281	3976.0	3582.3569	393.6431
1519	25.21712	3996.0	3687.0229	308.9771
1520	25.23142	4056.0	3828.4665	227.5335
1521	25.24573	4119.0	4010.0159	108.9841
1522	25.26003	4351.0	4219.8035	131.1965
1523	25.27434	4489.0	4420.1997	68.8003
1524	25.28865	4532.0	4560.4561	-28.4561
1525	25.30295	4590.0	4631.1143	-41.1143
1526	25.31726	4541.0	4689.9552	-148.9552
1527	25.33157	4778.0	4800.7353	-22.7353
1528	25.34587	5031.0	4984.6846	46.3154
1529	25.36018	5384.0	5240.3879	143.6121
1530	25.37449	6294.0	5574.1007	719.8993
1531	25.38879	7220.0	5971.026	1248.974
1532	25.40310	8118.0	6335.5443	1782.4557
1533	25.41740	9046.0	6504.5772	2541.4228
1534	25.43171	8815.0	6403.328	2411.672
1535	25.44602	8201.0	6142.1574	2058.8426
1536	25.46032	7444.0	5869.1325	1574.8675
1537	25.47463	7000.0	5607.7467	1392.2533
1538	25.48894	6700.0	5296.018	1403.982
1539	25.50324	6003.0	4920.8346	1082.1654
1540	25.51755	5356.0	4546.5775	809.4225
1541	25.53186	4788.0	4236.6133	551.3867
1542	25.54616	4401.0	4009.915	391.085
1543	25.56047	4182.0	3856.6883	325.3117
1544	25.57478	4142.0	3761.8123	380.1877
1545	25.58908	4010.0	3715.0036	294.9964
1546	25.60339	4138.0	3710.3995	427.6005
1547	25.61769	4065.0	3743.3574	321.6426
1548	25.63200	4118.0	3804.9414	313.0586
1549	25.64631	4337.0	3873.086	463.914
1550	25.66061	4418.0	3912.3943	505.6057
1551	25.67492	4252.0	3897.0146	354.9854
1552	25.68923	4216.0	3838.4489	377.5511
1553	25.70353	4199.0	3771.3408	427.6592
1554	25.71784	4008.0	3711.7246	296.2754
1555	25.73215	4074.0	3649.0175	424.9825
1556	25.74645	3838.0	3571.9927	266.0073
1557	25.76076	3754.0	3488.0165	265.9835
1558	25.77506	3801.0	3412.8862	388.1138
1559	25.78937	3798.0	3355.1391	442.8609
1560	25.80368	3788.0	3314.9815	473.0185
1561	25.81798	3692.0	3288.2803	403.7197
1562	25.83229	3719.0	3269.3211	449.6789
1563	25.84660	3642.0	3257.1597	384.8403
1564	25.86090	3782.0	3250.735	531.265
1565	25.87521	3928.0	3249.2597	678.7403
1566	25.88952	3991.0	3252.303	738.697
1567	25.90382	3827.0	3260.1649	566.8351
1568	25.91813	4053.0	3274.1236	778.8764
1569	25.93244	4124.0	3294.7635	829.2365
1570	25.94674	4096.0	3323.6554	772.3446
1571	25.96105	4031.0	3364.1562	666.8438
1572	25.97535	4095.0	3422.0935	672.9065
1573	25.98966	4184.0	3503.4861	680.5139
1574	26.00397	4263.0	3617.4194	645.5806
1575	26.01827	4529.0	3773.5628	755.4372
1576	26.03258	4838.0	3977.8443	860.1557
1577	26.04689	5333.0	4220.1752	1112.8248
1578	26.06119	5645.0	4456.9398	1188.0602
1579	26.07550	5678.0	4612.0663	1065.9337
1580	26.08981	5744.0	4630.55	1113.45
1581	26.10411	5361.0	4541.8327	819.1673
1582	26.11842	5100.0	4427.2474	672.7526
1583	26.13272	5027.0	4325.4291	701.5709
1584	26.14703	4843.0	4214.1114	628.8886
1585	26.16134	4605.0	4069.282	535.718
1586	26.17564	4229.0	3908.3969	320.6031
1587	26.18995	4018.0	3768.519	249.481
1588	26.20426	3905.0	3667.2017	237.7983
1589	26.21856	3894.0	3595.9001	298.0999
1590	26.23287	3780.0	3540.1276	239.8724
1591	26.24718	3800.0	3489.3758	310.6242
1592	26.26148	3776.0	3444.4895	331.5105
1593	26.27579	3761.0	3408.9593	352.0407
1594	26.29010	3767.0	3382.1716	384.8284
1595	26.30440	3802.0	3358.0707	443.9293
1596	26.31871	3718.0	3334.8244	383.1756
1597	26.33301	3721.0	3315.1082	405.8918
1598	26.34732	3639.0	3302.1461	336.8539
1599	26.36163	3554.0	3296.901	257.099
1600	26.37593	3565.0	3297.3578	267.6422
1601	26.39024	3560.0	3304.1133	255.8867
1602	26.40455	3533.0	3317.6602	215.3398
1603	26.41885	3718.0	3339.0108	378.9892
1604	26.43316	3561.0	3370.1373	190.8627
1605	26.44747	3764.0	3414.3841	349.6159
1606	26.46177	3952.0	3475.1998	476.8002
1607	26.47608	3940.0	3554.9605	385.0395
1608	26.49038	3853.0	3651.087	201.913
1609	26.50469	3987.0	3749.6291	237.3709
1610	26.51900	3941.0	3824.23	116.77
1611	26.53330	4098.0	3853.4401	244.5599
1612	26.54761	4135.0	3845.3623	289.6377
1613	26.56192	3938.0	3829.5676	108.4324
1614	26.57622	4178.0	3824.9517	353.0483
1615	26.59053	4087.0	3826.6807	260.3193
1616	26.60484	4235.0	3823.6142	411.3858
1617	26.61914	4155.0	3820.4048	334.5952
1618	26.63345	4119.0	3833.8777	285.1223
1619	26.64776	4075.0	3878.3379	196.6621
1620	26.66206	4163.0	3961.8088	201.1912
1621	26.67637	4375.0	4089.1055	285.8945
1622	26.69067	4612.0	4269.6997	342.3003
1623	26.70498	4779.0	4514.3848	264.6152
1624	26.71929	5244.0	4833.7433	410.2567
1625	26.73359	5604.0	5233.603	370.397
1626	26.74790	6063.0	5725.4128	337.5872
1627	26.76221	6650.0	6350.9079	299.0921
1628	26.77651	7350.0	7174.6075	175.3925
1629	26.79082	8695.0	8207.7783	487.2217
1630	26.80513	10198.0	9309.3204	888.6796
1631	26.81943	11068.0	10150.5807	917.4193
1632	26.83374	11239.0	10391.7014	847.2986
1633	26.84804	10398.0	10034.899	363.101
1634	26.86235	9568.0	9448.789	119.211
1635	26.87666	8865.0	8929.9423	-64.9423
1636	26.89096	8550.0	8452.0946	97.9054
1637	26.90527	7673.0	7846.3573	-173.3573
1638	26.91958	6989.0	7084.5198	-95.5198
1639	26.93388	6119.0	6313.8871	-194.8871
1640	26.94819	5397.0	5667.2855	-270.2855
1641	26.96250	4905.0	5176.6676	-271.6676
1642	26.97680	4662.0	4821.6676	-159.6676
1643	26.99111	4524.0	4575.635	-51.635
1644	27.00542	4478.0	4413.3547	64.6453
1645	27.01972	4505.0	4308.3992	196.6008
1646	27.03403	4293.0	4239.8355	53.1645
1647	27.04833	4301.0	4199.2708	101.7292
1648	27.06264	4183.0	4193.1551	-10.1551
1649	27.07695	4190.0	4234.0529	-44.0529
1650	27.09125	4087.0	4325.1988	-238.1988
1651	27.10556	4260.0	4447.4785	-187.4785
1652	27.11987	4167.0	4552.7408	-385.7408
1653	27.13417	4399.0	4581.4854	-182.4854
1654	27.14848	4147.0	4516.2198	-369.2198
1655	27.16279	4137.0	4404.8764	-267.8764
1656	27.17709	4043.0	4302.7261	-259.7261
1657	27.19140	4010.0	4217.0706	-207.0706
1658	27.20570	3936.0	4121.334	-185.334
1659	27.22001	3922.0	4002.5488	-80.5488
1660	27.23432	3773.0	3879.4255	-106.4255
1661	27.24862	3722.0	3777.6063	-55.6063
1662	27.26293	3774.0	3707.7237	66.2763
1663	27.27724	3738.0	3665.712	72.288
1664	27.29154	3836.0	3641.2538	194.7462
1665	27.30585	3750.0	3622.8105	127.1895
1666	27.32016	3799.0	3601.9984	197.0016
1667	27.33446	3779.0	3582.0351	196.9649
1668	27.34877	3801.0	3569.4082	231.5918
1669	27.36308	3685.0	3564.4659	120.5341
1670	27.37738	3836.0	3563.4777	272.5223
1671	27.39169	3883.0	3564.2654	318.7346
1672	27.40599	3936.0	3569.0065	366.9935
1673	27.42030	3926.0	3581.7599	344.2401
1674	27.43461	3944.0	3604.7313	339.2687
1675	27.44891	4016.0	3639.4506	376.5494
1676	27.46322	3999.0	3687.5696	311.4304
1677	27.47753	3993.0	3751.7249	241.2751
1678	27.49183	4045.0	3836.3952	208.6048
1679	27.50614	4037.0	3948.3752	88.6248
1680	27.52045	4247.0	4097.5578	149.4422
1681	27.53475	4312.0	4297.4298	14.5702
1682	27.54906	4325.0	4564.3297	-239.3297
1683	27.56336	4618.0	4913.1652	-295.1652
1684	27.57767	4978.0	5345.121	-367.121
1685	27.59198	5606.0	5831.7223	-225.7223
1686	27.60628	6027.0	6324.7084	-297.7084
1687	27.62059	6705.0	6813.3952	-108.3952
1688	27.63490	7310.0	7355.1708	-45.1708
1689	27.64920	8077.0	7977.9163	99.0837
1690	27.66351	8792.0	8550.2604	241.7396
1691	27.67782	9047.0	8828.4359	218.5641
1692	27.69212	9253.0	8724.0937	528.9063
1693	27.70643	9067.0	8436.7686	630.2314
1694	27.72074	9283.0	8193.0447	1089.9553
1695	27.73504	9091.0	8017.4592	1073.5408
1696	27.74935	8570.0	7814.3882	755.6118
1697	27.76365	8164.0	7568.671	595.329
1698	27.77796	7828.0	7392.4707	435.5293
1699	27.79227	7914.0	7385.6514	528.3486
1700	27.80657	8008.0	7532.2142	475.7858
1701	27.82088	8214.0	7694.2733	519.7267
1702	27.83519	7954.0	7687.6583	266.3417
1703	27.84949	7207.0	7443.3306	-236.3306
1704	27.86380	6763.0	7089.9342	-326.9342
1705	27.87811	6583.0	6793.3167	-210.3167
1706	27.89241	6230.0	6587.1362	-357.1362
1707	27.90672	6012.0	6393.7452	-381.7452
1708	27.92102	5640.0	6161.9491	-521.9491
1709	27.93533	5248.0	5944.6809	-696.6809
1710	27.94964	5192.0	5837.466	-645.466
1711	27.96394	5023.0	5896.7984	-873.7984
1712	27.97825	5246.0	6119.9371	-873.9371
1713	27.99256	5264.0	6446.212	-1182.212
1714	28.00686	5460.0	6746.6411	-1286.6411
1715	28.02117	5740.0	6864.2253	-1124.2253
1716	28.03548	5775.0	6761.8621	-986.8621
1717	28.04978	5733.0	6582.4874	-849.4874
1718	28.06409	5707.0	6479.9416	-772.9416
1719	28.07840	5821.0	6481.6505	-660.6505
1720	28.09270	5930.0	6529.3635	-599.3635
1721	28.10701	6182.0	6583.5174	-401.5174
1722	28.12131	6432.0	6670.2984	-238.2984
1723	28.13562	6573.0	6790.0753	-217.0753
1724	28.14993	6938.0	6846.7492	91.2508
1725	28.16423	7080.0	6734.4736	345.5264
1726	28.17854	6928.0	6469.8346	458.1654
1727	28.19285	6767.0	6173.4299	593.5701
1728	28.20715	6543.0	5929.8782	613.1218
1729	28.22146	6005.0	5718.9445	286.0555
1730	28.23577	5606.0	5476.2291	129.7709
1731	28.25007	5422.0	5185.4917	236.5083
1732	28.26438	5116.0	4895.2969	220.7031
1733	28.27868	4835.0	4662.3628	172.6372
1734	28.29299	4606.0	4511.8209	94.1791
1735	28.30730	4487.0	4440.4662	46.5338
1736	28.32160	4179.0	4427.5238	-248.5238
1737	28.33591	4216.0	4429.8258	-213.8258
1738	28.35022	4119.0	4400.2461	-281.2461
1739	28.36452	4219.0	4323.3805	-104.3805
1740	28.37883	4129.0	4232.74	-103.74
1741	28.39314	4096.0	4161.5985	-65.5985
1742	28.40744	4153.0	4110.3562	42.6438
1743	28.42175	4090.0	4058.0077	31.9923
1744	28.43606	4275.0	3991.691	283.309
1745	28.45036	4087.0	3920.5727	166.4273
1746	28.46467	4197.0	3861.8864	335.1136
1747	28.47897	4171.0	3823.5414	347.4586
1748	28.49328	4222.0	3805.4919	416.5081
1749	28.50759	4241.0	3804.2244	436.7756
1750	28.52189	4194.0	3819.524	374.476
1751	28.53620	4506.0	3848.8866	657.1134
1752	28.55051	4467.0	3888.9279	578.0721
1753	28.56481	4371.0	3943.6581	427.3419
1754	28.57912	4544.0	4016.1788	527.8212
1755	28.59343	4599.0	4110.6441	488.3559
1756	28.60773	4698.0	4233.3122	464.6878
1757	28.62204	4816.0	4393.449	422.551
1758	28.63634	4963.0	4603.1652	359.8348
1759	28.65065	5042.0	4875.978	166.022
1760	28.66496	5319.0	5223.5868	95.4132
1761	28.67926	5482.0	5648.9573	-166.9573
1762	28.69357	6118.0	6150.5576	-32.5576
1763	28.70788	6763.0	6747.7917	15.2083
1764	28.72218	7690.0	7513.0354	176.9646
1765	28.73649	8951.0	8550.194	400.806
1766	28.75080	10571.0	9901.743	669.257
1767	28.76510	12444.0	11425.7877	1018.2123
1768	28.77941	13673.0	12709.3712	963.6288
1769	28.79372	13476.0	13242.4542	233.5458
1770	28.80802	12252.0	12951.7882	-699.7882
1771	28.82233	11546.0	12372.975	-826.975
1772	28.83663	11365.0	12012.9332	-647.9332
1773	28.85094	11234.0	11867.9107	-633.9107
1774	28.86525	11142.0	11566.3879	-424.3879
1775	28.87955	9785.0	10825.5963	-1040.5963
1776	28.89386	8461.0	9772.5266	-1311.5266
1777	28.90817	7483.0	8728.7002	-1245.7002
1778	28.92247	6862.0	7879.7622	-1017.7622
1779	28.93678	6397.0	7230.2044	-833.2044
1780	28.95109	6139.0	6702.6025	-563.6025
1781	28.96539	5742.0	6239.8111	-497.8111
1782	28.97970	5220.0	5838.2526	-618.2526
1783	28.99400	5028.0	5514.3966	-486.3966
1784	29.00831	4985.0	5277.6348	-292.6348
1785	29.02262	4641.0	5118.1161	-477.1161
1786	29.03692	4682.0	5008.4188	-326.4188
1787	29.05123	4551.0	4922.0847	-371.0847
1788	29.06554	4450.0	4855.1667	-405.1667
1789	29.07984	4485.0	4826.9192	-341.9192
1790	29.09415	4438.0	4853.32	-415.32
1791	29.10846	4549.0	4926.9257	-377.9257
1792	29.12276	4695.0	5014.4496	-319.4496
1793	29.13707	4762.0	5073.2864	-311.2864
1794	29.15138	4738.0	5085.8419	-347.8419
1795	29.16568	4784.0	5082.736	-298.736
1796	29.17999	4724.0	5117.8356	-393.8356
1797	29.19429	4965.0	5218.0889	-253.0889
1798	29.20860	5122.0	5369.48	-247.48
1799	29.22291	5239.0	5523.4664	-284.4664
1800	29.23721	5273.0	5623.1414	-350.1414
1801	29.25152	5229.0	5637.8675	-408.8675
1802	29.26583	5284.0	5598.3221	-314.3221
1803	29.28013	5387.0	5577.001	-190.001
1804	29.29444	5446.0	5619.8445	-173.8445
1805	29.30875	5601.0	5724.6568	-123.6568
1806	29.32305	5622.0	5869.8889	-247.8889
1807	29.33736	5761.0	6060.8853	-299.8853
1808	29.35166	5988.0	6344.089	-356.089
1809	29.36597	6399.0	6784.939	-385.939
1810	29.38028	7003.0	7449.5199	-446.5199
1811	29.39458	7593.0	8404.2766	-811.2766
1812	29.40889	8669.0	9704.293	-1035.293
1813	29.42320	10065.0	11340.8135	-1275.8135
1814	29.43750	11418.0	13153.4624	-1735.4624
1815	29.45181	12853.0	14808.4206	-1955.4206
1816	29.46612	14105.0	15994.8858	-1889.8858
1817	29.48042	14773.0	16711.114	-1938.114
1818	29.49473	14646.0	17262.8185	-2616.8185
1819	29.50904	15355.0	17968.2981	-2613.2981
1820	29.52334	15638.0	18833.8122	-3195.8122
1821	29.53765	16767.0	19398.3327	-2631.3327
1822	29.55195	16632.0	19053.5146	-2421.5146
1823	29.56626	15724.0	17724.1099	-2000.1099
1824	29.58057	14835.0	16034.8319	-1199.8319
1825	29.59487	13804.0	14619.5973	-815.5973
1826	29.60918	12567.0	13602.244	-1035.244
1827	29.62349	12029.0	12716.7072	-687.7072
1828	29.63779	11240.0	11737.1826	-497.1826
1829	29.65210	10350.0	10746.1854	-396.1854
1830	29.66641	9815.0	9937.074	-122.074
1831	29.68071	9051.0	9332.4004	-281.4004
1832	29.69502	8438.0	8801.4902	-363.4902
1833	29.70932	7878.0	8263.5862	-385.5862
1834	29.72363	7425.0	7789.0193	-364.0193
1835	29.73794	7169.0	7481.6568	-312.6568
1836	29.75224	7218.0	7362.3431	-144.3431
1837	29.76655	7182.0	7375.5774	-193.5774
1838	29.78086	7481.0	7466.6485	14.3515
1839	29.79516	7563.0	7629.572	-66.572
1840	29.80947	7809.0	7847.2824	-38.2824
1841	29.82378	8131.0	8005.7142	125.2858
1842	29.83808	7835.0	7960.8866	-125.8866
1843	29.85239	7344.0	7719.7626	-375.7626
1844	29.86670	6845.0	7464.1693	-619.1693
1845	29.88100	6863.0	7349.8323	-486.8323
1846	29.89531	6944.0	7389.153	-445.153
1847	29.90961	6929.0	7509.0396	-580.0396
1848	29.92392	6840.0	7670.0507	-830.0507
1849	29.93823	7127.0	7919.3783	-792.3783
1850	29.95253	7378.0	8290.897	-912.897
1851	29.96684	7961.0	8680.011	-719.011
1852	29.98115	8292.0	8887.3615	-595.3615
1853	29.99545	8522.0	8812.956	-290.956
1854	30.00976	8530.0	8531.346	-1.346
1855	30.02407	8303.0	8166.4285	136.5715
1856	30.03837	7898.0	7796.8351	101.1649
1857	30.05268	7433.0	7423.0052	9.9948
1858	30.06698	7093.0	6996.9281	96.0719
1859	30.08129	6606.0	6507.8948	98.1052
1860	30.09560	6226.0	5992.604	233.396
1861	30.10990	5624.0	5498.9896	125.0104
1862	30.12421	5428.0	5072.2429	355.7571
1863	30.13852	4965.0	4735.3188	229.6812
1864	30.15282	4881.0	4483.5026	397.4974
1865	30.16713	4502.0	4299.4479	202.5521
1866	30.18144	4520.0	4165.9549	354.0451
1867	30.19574	4413.0	4070.3494	342.6506
1868	30.21005	4546.0	4005.3558	540.6442
1869	30.22436	4232.0	3966.7671	265.2329
1870	30.23866	4318.0	3952.209	365.791
1871	30.25297	4421.0	3960.5545	460.4455
1872	30.26727	4289.0	3990.12	298.88
1873	30.28158	4402.0	4034.0808	367.9192
1874	30.29589	4260.0	4078.5711	181.4289
1875	30.31019	4362.0	4109.8903	252.1097
1876	30.32450	4369.0	4124.2278	244.7722
1877	30.33881	4393.0	4142.3097	250.6903
1878	30.35311	4408.0	4182.9845	225.0155
1879	30.36742	4364.0	4245.0664	118.9336
1880	30.38173	4363.0	4305.0232	57.9768
1881	30.39603	4430.0	4329.6751	100.3249
1882	30.41034	4494.0	4312.2139	181.7861
1883	30.42464	4331.0	4282.697	48.303
1884	30.43895	4338.0	4279.6888	58.3112
1885	30.45326	4470.0	4321.9127	148.0873
1886	30.46756	4558.0	4405.8326	152.1674
1887	30.48187	4742.0	4518.4011	223.5989
1888	30.49618	5017.0	4644.7987	372.2013
1889	30.51048	5437.0	4759.4264	677.5736
1890	30.52479	5601.0	4826.0584	774.9416
1891	30.53910	5604.0	4840.9931	763.0069
1892	30.55340	5165.0	4858.1652	306.8348
1893	30.56771	5445.0	4939.593	505.407
1894	30.58202	5581.0	5108.2622	472.7378
1895	30.59632	6004.0	5345.5671	658.4329
1896	30.61063	6426.0	5604.3034	821.6966
1897	30.62493	6682.0	5818.6285	863.3715
1898	30.63924	7169.0	5919.8823	1249.1177
1899	30.65355	7124.0	5896.769	1227.231
1900	30.66785	6826.0	5839.6317	986.3683
1901	30.68216	7025.0	5863.9774	1161.0226
1902	30.69647	7000.0	6026.7426	973.2574
1903	30.71077	7593.0	6317.0617	1275.9383
1904	30.72508	8129.0	6709.9065	1419.0935
1905	30.73939	8594.0	7209.1768	1384.8232
1906	30.75369	9268.0	7805.691	1462.309
1907	30.76800	9557.0	8361.5482	1195.4518
1908	30.78230	9496.0	8621.3568	874.6432
1909	30.79661	8832.0	8447.9509	384.0491
1910	30.81092	8210.0	8007.8839	202.1161
1911	30.82522	7852.0	7584.6049	267.3951
1912	30.83953	7413.0	7298.6566	114.3434
1913	30.85384	7173.0	7058.5864	114.4136
1914	30.86814	6743.0	6707.9861	35.0139
1915	30.88245	6099.0	6206.2207	-107.2207
1916	30.89676	5548.0	5654.9197	-106.9197
1917	30.91106	5119.0	5167.4251	-48.4251
1918	30.92537	4953.0	4786.4382	166.5618
1919	30.93968	4674.0	4501.7893	172.2107
1920	30.95398	4581.0	4290.2476	290.7524
1921	30.96829	4484.0	4134.6004	349.3996
1922	30.98259	4458.0	4022.8604	435.1396
1923	30.99690	4414.0	3944.5881	469.4119
1924	31.01121	4284.0	3894.4031	389.5969
1925	31.02551	4348.0	3866.7239	481.2761
1926	31.03982	4286.0	3860.8641	425.1359
1927	31.05413	4287.0	3877.1023	409.8977
1928	31.06843	4329.0	3921.8338	407.1662
1929	31.08274	4227.0	3999.8128	227.1872
1930	31.09705	4216.0	4111.2129	104.7871
1931	31.11135	4349.0	4246.2852	102.7148
1932	31.12566	4430.0	4376.9465	53.0535
1933	31.13996	4249.0	4464.3821	-215.3821
1934	31.15427	4556.0	4497.9738	58.0262
1935	31.16858	4410.0	4513.774	-103.774
1936	31.18288	4467.0	4553.0551	-86.0551
1937	31.19719	4441.0	4620.3567	-179.3567
1938	31.21150	4563.0	4699.7246	-136.7246
1939	31.22580	4753.0	4786.3197	-33.3197
1940	31.24011	4983.0	4909.1897	73.8103
1941	31.25442	5434.0	5108.4901	325.5099
1942	31.26872	6083.0	5390.928	692.072
1943	31.28303	7007.0	5696.7572	1310.2428
1944	31.29734	7615.0	5902.3945	1712.6055
1945	31.31164	7613.0	5898.1636	1714.8364
1946	31.32595	7160.0	5706.8285	1453.1715
1947	31.34025	6809.0	5472.309	1336.691
1948	31.35456	6646.0	5307.7544	1338.2456
1949	31.36887	6513.0	5212.9441	1300.0559
1950	31.38317	6334.0	5113.7304	1220.2696
1951	31.39748	6232.0	4943.5846	1288.4154
1952	31.41179	5812.0	4708.9456	1103.0544
1953	31.42609	5192.0	4470.2262	721.7738
1954	31.44040	4912.0	4274.757	637.243
1955	31.45471	4789.0	4134.5028	654.4972
1956	31.46901	4626.0	4040.7828	585.2172
1957	31.48332	4704.0	3981.3207	722.6793
1958	31.49762	4465.0	3947.983	517.017
1959	31.51193	4431.0	3933.8754	497.1246
1960	31.52624	4463.0	3938.8605	524.1395
1961	31.54054	4533.0	3963.5995	569.4005
1962	31.55485	4465.0	4007.2574	457.7426
1963	31.56916	4461.0	4071.7794	389.2206
1964	31.58346	4523.0	4161.5488	361.4512
1965	31.59777	4560.0	4283.1557	276.8443
1966	31.61208	4621.0	4447.1565	173.8435
1967	31.62638	4781.0	4668.7012	112.2988
1968	31.64069	4887.0	4968.1218	-81.1218
1969	31.65500	5313.0	5374.6053	-61.6053
1970	31.66930	5776.0	5925.1726	-149.1726
1971	31.68361	6532.0	6653.3987	-121.3987
1972	31.69791	7615.0	7561.5179	53.4821
1973	31.71222	9160.0	8568.2247	591.7753
1974	31.72653	10346.0	9480.0105	865.9895
1975	31.74083	10518.0	10082.7221	435.2779
1976	31.75514	9989.0	10321.9168	-332.9168
1977	31.76945	9317.0	10358.1176	-1041.1176
1978	31.78375	9165.0	10400.3096	-1235.3096
1979	31.79806	9123.0	10497.7826	-1374.7826
1980	31.81237	9146.0	10516.0721	-1370.0721
1981	31.82667	8367.0	10337.9019	-1970.9019
1982	31.84098	7770.0	10039.6597	-2269.6597
1983	31.85528	7400.0	9795.639	-2395.639
1984	31.86959	7478.0	9674.7643	-2196.7643
1985	31.88390	8093.0	9562.2072	-1469.2072
1986	31.89820	8849.0	9264.1294	-415.1294
1987	31.91251	9003.0	8713.3535	289.6465
1988	31.92682	8151.0	8046.8464	104.1536
1989	31.94112	7158.0	7459.5784	-301.5784
1990	31.95543	6502.0	7028.5335	-526.5335
1991	31.96974	6487.0	6691.8174	-204.8174
1992	31.98404	6563.0	6348.8165	214.1835
1993	31.99835	6350.0	5959.7503	390.2497
1994	32.01266	5874.0	5565.2609	308.7391
1995	32.02696	5249.0	5232.5414	16.4586
1996	32.04127	4857.0	5002.7432	-145.7432
1997	32.05557	4609.0	4882.4644	-273.4644
1998	32.06988	4577.0	4861.4053	-284.4053
1999	32.08419	4421.0	4916.438	-495.438
2000	32.09849	4378.0	5000.618	-622.618
2001	32.11280	4251.0	5041.3329	-790.3329
2002	32.12711	4304.0	4985.5256	-681.5256
2003	32.14141	4394.0	4852.8154	-458.8154
2004	32.15572	4224.0	4714.3568	-490.3568
2005	32.17003	4187.0	4620.4275	-433.4275
2006	32.18433	4241.0	4566.4646	-325.4646
2007	32.19864	4245.0	4515.2991	-270.2991
2008	32.21294	4251.0	4437.6827	-186.6827
2009	32.22725	4223.0	4342.1415	-119.1415
2010	32.24156	4089.0	4263.212	-174.212
2011	32.25586	4169.0	4228.6442	-59.6442
2012	32.27017	4279.0	4246.9616	32.0384
2013	32.28448	4280.0	4316.5922	-36.5922
2014	32.29878	4496.0	4419.1261	76.8739
2015	32.31309	4629.0	4515.5718	113.4282
2016	32.32740	4784.0	4558.5276	225.4724
2017	32.34170	4689.0	4540.2392	148.7608
2018	32.35601	4768.0	4510.8844	257.1156
2019	32.37032	4600.0	4525.0775	74.9225
2020	32.38462	4736.0	4602.0412	133.9588
2021	32.39893	4739.0	4729.0414	9.9586
2022	32.41323	4934.0	4884.9889	49.0111
2023	32.42754	5116.0	5057.3088	58.6912
2024	32.44185	5195.0	5237.3299	-42.3299
2025	32.45615	5323.0	5405.8579	-82.8579
2026	32.47046	5588.0	5558.524	29.476
2027	32.48477	5944.0	5729.1568	214.8432
2028	32.49907	6230.0	5944.8097	285.1903
2029	32.51338	6525.0	6161.0943	363.9057
2030	32.52769	6779.0	6259.7257	519.2743
2031	32.54199	6461.0	6152.4606	308.5394
2032	32.55630	6158.0	5887.4657	270.5343
2033	32.57060	5922.0	5598.8259	323.1741
2034	32.58491	5521.0	5374.7413	146.2587
2035	32.59922	5505.0	5207.8325	297.1675
2036	32.61352	5343.0	5035.7015	307.2985
2037	32.62783	5170.0	4814.2498	355.7502
2038	32.64214	4870.0	4561.2252	308.7748
2039	32.65644	4569.0	4324.7524	244.2476
2040	32.67075	4514.0	4134.6268	379.3732
2041	32.68506	4260.0	3993.7256	266.2744
2042	32.69936	4323.0	3892.7633	430.2367
2043	32.71367	4247.0	3821.6381	425.3619
2044	32.72798	4185.0	3773.0136	411.9864
2045	32.74228	4166.0	3741.0468	424.9532
2046	32.75659	4332.0	3720.3527	611.6473
2047	32.77089	4166.0	3710.0354	455.9646
2048	32.78520	4234.0	3709.0693	524.9307
2049	32.79951	4308.0	3715.5998	592.4002
2050	32.81381	4288.0	3729.7158	558.2842
2051	32.82812	4294.0	3753.1222	540.8778
2052	32.84243	4303.0	3787.1544	515.8456
2053	32.85673	4479.0	3833.7569	645.2431
2054	32.87104	4534.0	3895.995	638.005
2055	32.88535	4519.0	3976.9526	542.0474
2056	32.89965	4638.0	4082.9879	555.0121
2057	32.91396	4731.0	4220.4038	510.5962
2058	32.92826	4949.0	4393.2777	555.7223
2059	32.94257	5101.0	4600.3017	500.6983
2060	32.95688	5272.0	4838.1126	433.8874
2061	32.97118	5617.0	5116.4952	500.5048
2062	32.98549	6129.0	5473.2408	655.7592
2063	32.99980	6953.0	5960.9609	992.0391
2064	33.01410	7838.0	6607.1649	1230.8351
2065	33.02841	8833.0	7362.2072	1470.7928
2066	33.04272	9629.0	8061.9589	1567.0411
2067	33.05702	9778.0	8493.3933	1284.6067
2068	33.07133	9481.0	8615.0387	865.9613
2069	33.08564	9335.0	8653.1904	681.8096
2070	33.09994	9286.0	8871.2709	414.7291
2071	33.11425	9506.0	9319.6975	186.3025
2072	33.12855	9542.0	9775.5678	-233.5678
2073	33.14286	9189.0	9875.5054	-686.5054
2074	33.15717	8685.0	9442.1185	-757.1185
2075	33.17147	8182.0	8688.863	-506.863
2076	33.18578	7346.0	7970.8959	-624.8959
2077	33.20009	6796.0	7468.6663	-672.6663
2078	33.21439	6282.0	7140.4664	-858.4664
2079	33.22870	6069.0	6835.3135	-766.3135
2080	33.24301	5889.0	6447.3508	-558.3508
2081	33.25731	5463.0	6007.2963	-544.2963
2082	33.27162	5218.0	5615.2522	-397.2522
2083	33.28592	5221.0	5333.0227	-112.0227
2084	33.30023	4946.0	5157.2852	-211.2852
2085	33.31454	4595.0	5040.848	-445.848
2086	33.32884	4589.0	4925.321	-336.321
2087	33.34315	4606.0	4789.7858	-183.7858
2088	33.35746	4563.0	4662.7373	-99.7373
2089	33.37176	4430.0	4579.9851	-149.9851
2090	33.38607	4413.0	4551.1109	-138.1109
2091	33.40038	4483.0	4561.7731	-78.7731
2092	33.41468	4388.0	4589.7614	-201.7614
2093	33.42899	4448.0	4624.8634	-176.8634
2094	33.44330	4472.0	4672.3784	-200.3784
2095	33.45760	4394.0	4728.1869	-334.1869
2096	33.47191	4483.0	4777.2933	-294.2933
2097	33.48621	4287.0	4825.8533	-538.8533
2098	33.50052	4578.0	4913.8424	-335.8424
2099	33.51483	4481.0	5077.389	-596.389
2100	33.52913	4585.0	5310.7752	-725.7752
2101	33.54344	4510.0	5551.7044	-1041.7044
2102	33.55775	4538.0	5701.0925	-1163.0925
2103	33.57205	4667.0	5698.6252	-1031.6252
2104	33.58636	4757.0	5584.6691	-827.6691
2105	33.60067	4755.0	5452.6165	-697.6165
2106	33.61497	4725.0	5368.6127	-643.6127
2107	33.62928	4722.0	5344.9812	-622.9812
2108	33.64358	4809.0	5351.7955	-542.7955
2109	33.65789	5099.0	5359.029	-260.029
2110	33.67220	5067.0	5375.3885	-308.3885
2111	33.68650	5340.0	5445.4966	-105.4966
2112	33.70081	5572.0	5621.0445	-49.0445
2113	33.71512	5922.0	5947.5155	-25.5155
2114	33.72942	6549.0	6452.86	96.14
2115	33.74373	7180.0	7120.8355	59.1645
2116	33.75804	7977.0	7847.8876	129.1124
2117	33.77234	8047.0	8439.1478	-392.1478
2118	33.78665	7933.0	8737.0775	-804.0775
2119	33.80096	7936.0	8781.4473	-845.4473
2120	33.81526	7786.0	8739.7359	-953.7359
2121	33.82957	7699.0	8701.9631	-1002.9631
2122	33.84387	7667.0	8668.4777	-1001.4777
2123	33.85818	7547.0	8635.5909	-1088.5909
2124	33.87249	7291.0	8589.3731	-1298.3731
2125	33.88679	7211.0	8501.7987	-1290.7987
2126	33.90110	7370.0	8322.1503	-952.1503
2127	33.91541	6955.0	7964.5481	-1009.5481
2128	33.92971	6604.0	7426.1535	-822.1535
2129	33.94402	6188.0	6852.9441	-664.9441
2130	33.95833	5735.0	6399.984	-664.984
2131	33.97263	5428.0	6109.8483	-681.8483
2132	33.98694	5506.0	5927.6695	-421.6695
2133	34.00124	5407.0	5768.4997	-361.4997
2134	34.01555	5241.0	5590.6752	-349.6752
2135	34.02986	5020.0	5423.7333	-403.7333
2136	34.04416	4867.0	5316.8358	-449.8358
2137	34.05847	4902.0	5295.8699	-393.8699
2138	34.07278	4984.0	5368.6014	-384.6014
2139	34.08708	5280.0	5519.0175	-239.0175
2140	34.10139	5321.0	5681.2145	-360.2145
2141	34.11570	5446.0	5749.0792	-303.0792
2142	34.13000	5453.0	5660.8168	-207.8168
2143	34.14431	5338.0	5469.1151	-131.1151
2144	34.15862	5141.0	5283.379	-142.379
2145	34.17292	5156.0	5167.5625	-11.5625
2146	34.18723	4985.0	5106.8687	-121.8687
2147	34.20153	4906.0	5038.7843	-132.7843
2148	34.21584	4913.0	4915.3684	-2.3684
2149	34.23015	4725.0	4750.8779	-25.8779
2150	34.24445	4534.0	4597.1679	-63.1679
2151	34.25876	4471.0	4487.74	-16.74
2152	34.27307	4300.0	4420.9853	-120.9853
2153	34.28737	4346.0	4378.5672	-32.5672
2154	34.30168	4417.0	4342.5216	74.4784
2155	34.31599	4280.0	4294.9304	-14.9304
2156	34.33029	4126.0	4225.8865	-99.8865
2157	34.34460	4260.0	4143.5403	116.4597
2158	34.35890	4188.0	4065.7038	122.2962
2159	34.37321	4189.0	4002.9288	186.0712
2160	34.38752	4170.0	3956.1613	213.8387
2161	34.40182	4093.0	3914.7739	178.2261
2162	34.41613	4149.0	3866.5954	282.4046
2163	34.43044	4067.0	3812.5786	254.4214
2164	34.44474	4013.0	3761.8825	251.1175
2165	34.45905	3999.0	3723.5333	275.4667
2166	34.47336	4010.0	3701.2134	308.7866
2167	34.48766	4029.0	3695.1291	333.8709
2168	34.50197	4032.0	3705.2895	326.7105
2169	34.51628	4197.0	3732.7051	464.2949
2170	34.53058	4043.0	3780.5501	262.4499
2171	34.54489	4229.0	3854.5561	374.4439
2172	34.55919	4252.0	3963.1778	288.8222
2173	34.57350	4335.0	4117.3293	217.6707
2174	34.58781	4581.0	4325.233	255.767
2175	34.60211	4714.0	4580.3034	133.6966
2176	34.61642	4940.0	4838.4307	101.5693
2177	34.63073	4859.0	5015.3335	-156.3335
2178	34.64503	4796.0	5036.5387	-240.5387
2179	34.65934	4769.0	4918.7529	-149.7529
2180	34.67365	4647.0	4763.2589	-116.2589
2181	34.68795	4721.0	4658.3441	62.6559
2182	34.70226	4532.0	4618.5194	-86.5194
2183	34.71656	4441.0	4604.7389	-163.7389
2184	34.73087	4572.0	4562.967	9.033
2185	34.74518	4438.0	4473.2296	-35.2296
2186	34.75948	4353.0	4364.837	-11.837
2187	34.77379	4347.0	4276.0943	70.9057
2188	34.78810	4336.0	4213.0786	122.9214
2189	34.80240	4268.0	4153.9724	114.0276
2190	34.81671	4134.0	4081.0295	52.9705
2191	34.83102	4219.0	4000.9967	218.0033
2192	34.84532	4245.0	3932.4421	312.5579
2193	34.85963	4222.0	3884.6998	337.3002
2194	34.87394	4099.0	3854.5419	244.4581
2195	34.88824	4031.0	3829.186	201.814
2196	34.90255	4055.0	3796.6354	258.3646
2197	34.91685	4077.0	3756.2156	320.7844
2198	34.93116	3988.0	3716.1849	271.8151
2199	34.94547	4039.0	3684.0267	354.9733
2200	34.95977	3981.0	3663.2693	317.7307
2201	34.97408	3897.0	3654.474	242.526
2202	34.98839	4095.0	3656.912	438.088
2203	35.00269	4110.0	3670.4987	439.5013
2204	35.01700	4022.0	3697.8417	324.1583
2205	35.03131	4014.0	3739.985	274.015
2206	35.04561	4123.0	3797.2843	325.7157
2207	35.05992	4188.0	3870.5769	317.4231
2208	35.07422	4168.0	3960.5196	207.4804
2209	35.08853	4472.0	4064.971	407.029
2210	35.10284	4464.0	4182.5254	281.4746
2211	35.11714	4640.0	4306.8361	333.1639
2212	35.13145	4647.0	4434.7116	212.2884
2213	35.14576	4534.0	4583.7489	-49.7489
2214	35.16006	4709.0	4787.8863	-78.8863
2215	35.17437	4629.0	5070.6862	-441.6862
2216	35.18868	5068.0	5420.8798	-352.8798
2217	35.20298	5427.0	5772.6076	-345.6076
2218	35.21729	5840.0	6020.1252	-180.1252
2219	35.23160	6212.0	6100.9315	111.0685
2220	35.24590	5974.0	6071.2254	-97.2254
2221	35.26021	5563.0	6049.2596	-486.2596
2222	35.27451	5328.0	6087.975	-759.975
2223	35.28882	5338.0	6139.6489	-801.6489
2224	35.30313	5333.0	6128.7321	-795.7321
2225	35.31743	5525.0	6037.1256	-512.1256
2226	35.33174	5355.0	5922.6417	-567.6417
2227	35.34605	5370.0	5871.6672	-501.6672
2228	35.36035	5241.0	5947.4943	-706.4943
2229	35.37466	5336.0	6168.5176	-832.5176
2230	35.38897	5344.0	6527.3934	-1183.3934
2231	35.40327	5657.0	7000.8432	-1343.8432
2232	35.41758	5708.0	7505.8844	-1797.8844
2233	35.43188	5913.0	7855.0997	-1942.0997
2234	35.44619	6103.0	7854.3617	-1751.3617
2235	35.46050	6125.0	7510.8201	-1385.8201
2236	35.47480	6065.0	7051.385	-986.385
2237	35.48911	5740.0	6694.5966	-954.5966
2238	35.50342	5608.0	6502.2445	-894.2445
2239	35.51772	5413.0	6395.5656	-982.5656
2240	35.53203	5393.0	6233.9988	-840.9988
2241	35.54634	5139.0	5929.0958	-790.0958
2242	35.56064	5140.0	5520.0877	-380.0877
2243	35.57495	4901.0	5111.5862	-210.5862
2244	35.58926	4646.0	4775.6184	-129.6184
2245	35.60356	4585.0	4530.1655	54.8345
2246	35.61787	4447.0	4365.9622	81.0378
2247	35.63217	4376.0	4265.6832	110.3168
2248	35.64648	4433.0	4209.8641	223.1359
2249	35.66079	4391.0	4173.0144	217.9856
2250	35.67509	4556.0	4129.3745	426.6255
2251	35.68940	4446.0	4069.144	376.856
2252	35.70371	4312.0	4006.2472	305.7528
2253	35.71801	4218.0	3960.649	257.351
2254	35.73232	4190.0	3941.8397	248.1603
2255	35.74663	4177.0	3947.3127	229.6873
2256	35.76093	4190.0	3967.3759	222.6241
2257	35.77524	4370.0	3992.0121	377.9879
2258	35.78954	4219.0	4015.4241	203.5759
2259	35.80385	4402.0	4028.4644	373.5356
2260	35.81816	4361.0	4016.1963	344.8037
2261	35.83246	4504.0	3976.3777	527.6223
2262	35.84677	4540.0	3931.0396	608.9604
2263	35.86108	4476.0	3904.9568	571.0432
2264	35.87538	4395.0	3908.1031	486.8969
2265	35.88969	4330.0	3936.3807	393.6193
2266	35.90400	4282.0	3974.5118	307.4882
2267	35.91830	4169.0	4002.0334	166.9666
2268	35.93261	4321.0	4010.8107	310.1893
2269	35.94692	4315.0	4006.4176	308.5824
2270	35.96122	4445.0	3997.7191	447.2809
2271	35.97553	4302.0	3984.5838	317.4162
2272	35.98983	4175.0	3964.0327	210.9673
2273	36.00414	4116.0	3942.4628	173.5372
2274	36.01845	4084.0	3930.4877	153.5123
2275	36.03275	4070.0	3932.69	137.31
2276	36.04706	4124.0	3947.3677	176.6323
2277	36.06137	4128.0	3966.4672	161.5328
2278	36.07567	4135.0	3973.0756	161.9244
2279	36.08998	4149.0	3954.0989	194.9011
2280	36.10429	4100.0	3915.6685	184.3315
2281	36.11859	4055.0	3878.7924	176.2076
2282	36.13290	3994.0	3860.2264	133.7736
2283	36.14720	4081.0	3864.8227	216.1773
2284	36.16151	4056.0	3889.2458	166.7542
2285	36.17582	4165.0	3927.1698	237.8302
2286	36.19012	4160.0	3977.2385	182.7615
2287	36.20443	4184.0	4047.4612	136.5388
2288	36.21874	4168.0	4152.6822	15.3178
2289	36.23304	4137.0	4308.8363	-171.8363
2290	36.24735	4349.0	4522.8079	-173.8079
2291	36.26166	4482.0	4779.7102	-297.7102
2292	36.27596	4524.0	5027.0079	-503.0079
2293	36.29027	4905.0	5185.8596	-280.8596
2294	36.30458	5091.0	5217.7399	-126.7399
2295	36.31888	5228.0	5173.2121	54.7879
2296	36.33319	5216.0	5133.7733	82.2267
2297	36.34749	5155.0	5131.9719	23.0281
2298	36.36180	5353.0	5146.27	206.73
2299	36.37611	5190.0	5141.8397	48.1603
2300	36.39041	5144.0	5102.8906	41.1094
2301	36.40472	5210.0	5046.1653	163.8347
2302	36.41903	5164.0	5011.4105	152.5895
2303	36.43333	5167.0	5027.1176	139.8824
2304	36.44764	5408.0	5082.8947	325.1053
2305	36.46195	5352.0	5143.5412	208.4588
2306	36.47625	5450.0	5186.5712	263.4288
2307	36.49056	5454.0	5216.303	237.697
2308	36.50486	5551.0	5235.2999	315.7001
2309	36.51917	5483.0	5235.5785	247.4215
2310	36.53348	5508.0	5230.3731	277.6269
2311	36.54778	5339.0	5262.1974	76.8026
2312	36.56209	5165.0	5365.1845	-200.1845
2313	36.57640	5165.0	5545.3855	-380.3855
2314	36.59070	5458.0	5771.4022	-313.4022
2315	36.60501	5525.0	5954.9567	-429.9567
2316	36.61932	5655.0	5978.8187	-323.8187
2317	36.63362	5750.0	5805.0263	-55.0263
2318	36.64793	5319.0	5528.4915	-209.4915
2319	36.66224	5094.0	5281.0687	-187.0687
2320	36.67654	4850.0	5128.9892	-278.9892
2321	36.69085	4923.0	5063.4057	-140.4057
2322	36.70515	4747.0	5025.8378	-278.8378
2323	36.71946	4841.0	4951.1561	-110.1561
2324	36.73377	4681.0	4823.7113	-142.7113
2325	36.74807	4732.0	4684.4543	47.5457
2326	36.76238	4620.0	4584.1585	35.8415
2327	36.77669	4644.0	4551.4036	92.5964
2328	36.79099	4629.0	4595.2251	33.7749
2329	36.80530	4561.0	4710.9716	-149.9716
2330	36.81961	4686.0	4873.8656	-187.8656
2331	36.83391	4833.0	5025.6693	-192.6693
2332	36.84822	4731.0	5093.4603	-362.4603
2333	36.86252	4655.0	5058.1163	-403.1163
2334	36.87683	4681.0	4984.8542	-303.8542
2335	36.89114	4736.0	4958.0823	-222.0823
2336	36.90544	4778.0	5018.5372	-240.5372
2337	36.91975	4754.0	5155.3851	-401.3851
2338	36.93406	4915.0	5313.9503	-398.9503
2339	36.94836	4730.0	5417.0945	-687.0945
2340	36.96267	4681.0	5418.9316	-737.9316
2341	36.97698	4715.0	5341.6931	-626.6931
2342	36.99128	4625.0	5251.061	-626.061
2343	37.00559	4763.0	5213.412	-450.412
2344	37.01990	4897.0	5268.761	-371.761
2345	37.03420	5038.0	5422.488	-384.488
2346	37.04851	5242.0	5643.3695	-401.3695
2347	37.06281	5398.0	5866.4451	-468.4451
2348	37.07712	5387.0	6012.002	-625.002
2349	37.09143	5430.0	6038.5259	-608.5259
2350	37.10573	5636.0	5996.9531	-360.9531
2351	37.12004	5558.0	5998.3864	-440.3864
2352	37.13435	5601.0	6117.5307	-516.5307
2353	37.14865	5562.0	6336.8777	-774.8777
2354	37.16296	5729.0	6553.0367	-824.0367
2355	37.17727	5775.0	6646.1243	-871.1243
2356	37.19157	5576.0	6594.6764	-1018.6764
2357	37.20588	5770.0	6505.3564	-735.3564
2358	37.22018	5767.0	6498.7523	-731.7523
2359	37.23449	5946.0	6596.4446	-650.4446
2360	37.24880	5875.0	6709.3948	-834.3948
2361	37.26310	5834.0	6707.7608	-873.7608
2362	37.27741	5780.0	6536.2617	-756.2617
2363	37.29172	5592.0	6271.3573	-679.3573
2364	37.30602	5571.0	6046.2793	-475.2793
2365	37.32033	5716.0	5943.7054	-227.7054
2366	37.33464	5747.0	5966.2652	-219.2652
2367	37.34894	5835.0	6060.6014	-225.6014
2368	37.36325	5876.0	6155.0115	-279.0115
2369	37.37756	5894.0	6201.2933	-307.2933
2370	37.39186	5852.0	6204.1767	-352.1767
2371	37.40617	5711.0	6219.7258	-508.7258
2372	37.42047	5806.0	6317.3385	-511.3385
2373	37.43478	5782.0	6519.5799	-737.5799
2374	37.44909	6062.0	6755.3069	-693.3069
2375	37.46339	6315.0	6875.7019	-560.7019
2376	37.47770	6282.0	6770.5668	-488.5668
2377	37.49201	6017.0	6482.9283	-465.9283
2378	37.50631	5511.0	6160.8958	-649.8958
2379	37.52062	5337.0	5922.819	-585.819
2380	37.53493	5062.0	5794.8744	-732.8744
2381	37.54923	5272.0	5725.2607	-453.2607
2382	37.56354	5201.0	5631.4131	-430.4131
2383	37.57784	5206.0	5468.6141	-262.6141
2384	37.59215	4971.0	5269.295	-298.295
2385	37.60646	4907.0	5103.5941	-196.5941
2386	37.62076	4620.0	5022.338	-402.338
2387	37.63507	4651.0	5043.1482	-392.1482
2388	37.64938	4658.0	5159.5376	-501.5376
2389	37.66368	4798.0	5339.7529	-541.7529
2390	37.67799	4753.0	5518.9206	-765.9206
2391	37.69230	4585.0	5625.6489	-1040.6489
2392	37.70660	4724.0	5650.7673	-926.7673
2393	37.72091	4746.0	5658.1192	-912.1192
2394	37.73522	4748.0	5692.9211	-944.9211
2395	37.74952	4602.0	5722.2639	-1120.2639
2396	37.76383	4789.0	5683.9783	-894.9783
2397	37.77813	4679.0	5562.2441	-883.2441
2398	37.79244	4708.0	5386.6875	-678.6875
2399	37.80675	4593.0	5203.9603	-610.9603
2400	37.82105	4641.0	5057.1861	-416.1861
2401	37.83536	4607.0	4957.8178	-350.8178
2402	37.84967	4575.0	4877.6616	-302.6616
2403	37.86397	4678.0	4780.2118	-102.2118
2404	37.87828	4724.0	4652.2324	71.7676
2405	37.89259	4640.0	4508.8145	131.1855
2406	37.90689	4640.0	4374.5618	265.4382
2407	37.92120	4575.0	4270.0012	304.9988
2408	37.93550	4533.0	4204.579	328.421
2409	37.94981	4376.0	4177.9793	198.0207
2410	37.96412	4505.0	4186.279	318.721
2411	37.97842	4379.0	4220.0216	158.9784
2412	37.99273	4552.0	4264.7929	287.2071
2413	38.00704	4440.0	4298.0795	141.9205
2414	38.02134	4330.0	4293.5946	36.4054
2415	38.03565	4427.0	4240.7732	186.2268
2416	38.04996	4398.0	4161.0262	236.9738
2417	38.06426	4264.0	4088.5364	175.4636
2418	38.07857	4363.0	4043.0289	319.9711
2419	38.09288	4208.0	4023.7799	184.2201
2420	38.10718	4377.0	4016.1809	360.8191
2421	38.12149	4271.0	4001.8624	269.1376
2422	38.13579	4254.0	3971.4537	282.5463
2423	38.15010	4168.0	3932.6104	235.3896
2424	38.16441	4393.0	3898.7831	494.2169
2425	38.17871	4324.0	3876.3365	447.6635
2426	38.19302	4327.0	3864.8243	462.1757
2427	38.20733	4213.0	3862.8778	350.1222
2428	38.22163	4274.0	3873.0231	400.9769
2429	38.23594	4294.0	3899.9691	394.0309
2430	38.25025	4234.0	3949.1345	284.8655
2431	38.26455	4235.0	4023.4159	211.5841
2432	38.27886	4277.0	4128.1939	148.8061
2433	38.29316	4417.0	4266.3408	150.6592
2434	38.30747	4367.0	4434.6079	-67.6079
2435	38.32178	4536.0	4616.699	-80.699
2436	38.33608	4670.0	4789.0143	-119.0143
2437	38.35039	4720.0	4946.4663	-226.4663
2438	38.36470	4815.0	5104.1946	-289.1946
2439	38.37900	4842.0	5253.3727	-411.3727
2440	38.39331	4845.0	5349.1369	-504.1369
2441	38.40762	4747.0	5370.3589	-623.3589
2442	38.42192	4732.0	5360.4033	-628.4033
2443	38.43623	4731.0	5377.3216	-646.3216
2444	38.45054	4750.0	5441.2106	-691.2106
2445	38.46484	4840.0	5533.6107	-693.6107
2446	38.47915	4830.0	5608.2608	-778.2608
2447	38.49345	5106.0	5624.5566	-518.5566
2448	38.50776	5170.0	5593.3653	-423.3653
2449	38.52207	5278.0	5580.5305	-302.5305
2450	38.53637	5491.0	5639.296	-148.296
2451	38.55068	5678.0	5749.5733	-71.5733
2452	38.56499	6005.0	5823.0224	181.9776
2453	38.57929	5897.0	5773.3078	123.6922
2454	38.59360	5996.0	5602.3503	393.6497
2455	38.60791	5896.0	5397.7064	498.2936
2456	38.62221	5792.0	5249.2858	542.7142
2457	38.63652	5566.0	5194.5285	371.4715
2458	38.65082	5408.0	5221.4897	186.5103
2459	38.66513	5398.0	5292.1871	105.8129
2460	38.67944	5335.0	5373.7489	-38.7489
2461	38.69374	5263.0	5469.9058	-206.9058
2462	38.70805	5331.0	5612.551	-281.551
2463	38.72236	5295.0	5818.2044	-523.2044
2464	38.73666	5171.0	6060.3265	-889.3265
2465	38.75097	5089.0	6267.4527	-1178.4527
2466	38.76528	5144.0	6353.2309	-1209.2309
2467	38.77958	5295.0	6302.047	-1007.047
2468	38.79389	5516.0	6188.9485	-672.9485
2469	38.80820	5309.0	6084.7413	-775.7413
2470	38.82250	5225.0	6008.0785	-783.0785
2471	38.83681	5109.0	5949.1846	-840.1846
2472	38.85111	5059.0	5882.1156	-823.1156
2473	38.86542	4942.0	5778.7897	-836.7897
2474	38.87973	5063.0	5640.0561	-577.0561
2475	38.89403	5090.0	5497.7958	-407.7958
2476	38.90834	5264.0	5370.6391	-106.6391
2477	38.92265	4883.0	5241.8132	-358.8132
2478	38.93695	4911.0	5089.2759	-178.2759
2479	38.95126	4717.0	4920.5952	-203.5952
2480	38.96557	4614.0	4770.7222	-156.7222
2481	38.97987	4623.0	4673.6761	-50.6761
2482	38.99418	4583.0	4642.0766	-59.0766
2483	39.00848	4520.0	4668.381	-148.381
2484	39.02279	4615.0	4728.1192	-113.1192
2485	39.03710	4753.0	4786.4737	-33.4737
2486	39.05140	4675.0	4810.1081	-135.1081
2487	39.06571	4784.0	4782.9904	1.0096
2488	39.08002	4587.0	4711.3089	-124.3089
2489	39.09432	4648.0	4621.0856	26.9144
2490	39.10863	4653.0	4546.9195	106.0805
2491	39.12294	4751.0	4510.4288	240.5712
2492	39.13724	4625.0	4510.8223	114.1777
2493	39.15155	4563.0	4531.405	31.595
2494	39.16586	4758.0	4555.1277	202.8723
2495	39.18016	4784.0	4577.456	206.544
2496	39.19447	4935.0	4609.5695	325.4305
2497	39.20877	5072.0	4674.6456	397.3544
2498	39.22308	4921.0	4798.8056	122.1944
2499	39.23739	5155.0	5006.2631	148.7369
2500	39.25169	5216.0	5320.9505	-104.9505
2501	39.26600	5492.0	5763.2916	-271.2916
2502	39.28031	5817.0	6329.6449	-512.6449
2503	39.29461	6358.0	6947.1132	-589.1132
2504	39.30892	6651.0	7449.0773	-798.0773
2505	39.32323	6423.0	7650.0667	-1227.0667
2506	39.33753	6302.0	7508.1152	-1206.1152
2507	39.35184	6235.0	7173.1072	-938.1072
2508	39.36614	6135.0	6848.2501	-713.2501
2509	39.38045	5953.0	6660.7214	-707.7214
2510	39.39476	5782.0	6626.7067	-844.7067
2511	39.40906	5992.0	6669.8646	-677.8646
2512	39.42337	5869.0	6677.601	-808.601
2513	39.43768	5720.0	6589.2131	-869.2131
2514	39.45198	5758.0	6445.1752	-687.1752
2515	39.46629	5581.0	6338.5551	-757.5551
2516	39.48060	5851.0	6339.0801	-488.0801
2517	39.49490	5934.0	6458.3263	-524.3263
2518	39.50921	6106.0	6648.146	-542.146
2519	39.52352	6347.0	6818.8066	-471.8066
2520	39.53782	6600.0	6877.3509	-277.3509
2521	39.55213	6794.0	6787.3767	6.6233
2522	39.56643	6711.0	6604.2205	106.7795
2523	39.58074	6643.0	6429.159	213.841
2524	39.59505	6625.0	6342.7922	282.2078
2525	39.60935	6481.0	6363.794	117.206
2526	39.62366	6319.0	6440.2078	-121.2078
2527	39.63797	6373.0	6472.6351	-99.6351
2528	39.65227	6125.0	6371.6635	-246.6635
2529	39.66658	5991.0	6135.3164	-144.3164
2530	39.68089	6014.0	5853.1491	160.8509
2531	39.69519	5787.0	5626.6681	160.3319
2532	39.70950	5487.0	5511.1336	-24.1336
2533	39.72380	5325.0	5517.4926	-192.4926
2534	39.73811	5412.0	5626.822	-214.822
2535	39.75242	5490.0	5801.7237	-311.7237
2536	39.76672	5427.0	5991.3553	-564.3553
2537	39.78103	5475.0	6125.9722	-650.9722
2538	39.79534	5169.0	6126.4721	-957.4721
2539	39.80964	5141.0	5971.4745	-830.4745
2540	39.82395	5069.0	5742.638	-673.638
2541	39.83826	5049.0	5552.0314	-503.0314
2542	39.85256	4949.0	5461.1006	-512.1006
2543	39.86687	5048.0	5472.76	-424.76
2544	39.88118	5020.0	5551.3119	-531.3119
2545	39.89548	5090.0	5643.794	-553.794
2546	39.90979	5213.0	5719.0441	-506.0441
2547	39.92409	5220.0	5797.803	-577.803
2548	39.93840	5456.0	5922.0845	-466.0845
2549	39.95271	5542.0	6098.0672	-556.0672
2550	39.96701	5749.0	6272.2625	-523.2625
2551	39.98132	5609.0	6352.4149	-743.4149
2552	39.99563	5619.0	6287.6396	-668.6396
2553	40.00993	5474.0	6138.2264	-664.2264
2554	40.02424	5561.0	6025.4497	-464.4497
2555	40.03855	5532.0	6026.9406	-494.9406
2556	40.05285	5648.0	6136.7335	-488.7335
2557	40.06716	5742.0	6275.6897	-533.6897
2558	40.08146	5521.0	6327.1324	-806.1324
2559	40.09577	5407.0	6224.2869	-817.2869
2560	40.11008	5273.0	6018.3094	-745.3094
2561	40.12438	5373.0	5826.8448	-453.8448
2562	40.13869	5184.0	5734.5164	-550.5164
2563	40.15300	5154.0	5747.4031	-593.4031
2564	40.16730	5285.0	5795.0905	-510.0905
2565	40.18161	4976.0	5771.7318	-795.7318
2566	40.19592	5031.0	5620.9187	-589.9187
2567	40.21022	5095.0	5389.1623	-294.1623
2568	40.22453	4992.0	5164.6454	-172.6454
2569	40.23884	4984.0	5001.3779	-17.3779
2570	40.25314	4823.0	4912.2238	-89.2238
2571	40.26745	4812.0	4880.0481	-68.0481
2572	40.28175	4840.0	4870.483	-30.483
2573	40.29606	4756.0	4856.8621	-100.8621
2574	40.31037	4892.0	4844.8864	47.1136
2575	40.32467	5025.0	4856.9278	168.0722
2576	40.33898	4979.0	4892.7966	86.2034
2577	40.35329	5167.0	4917.2787	249.7213
2578	40.36759	5172.0	4886.3117	285.6883
2579	40.38190	5124.0	4793.2145	330.7855
2580	40.39621	4863.0	4682.9599	180.0401
2581	40.41051	4892.0	4608.4177	283.5823
2582	40.42482	4815.0	4594.9021	220.0979
2583	40.43912	4943.0	4642.9193	300.0807
2584	40.45343	4852.0	4736.2623	115.7377
2585	40.46774	4832.0	4849.1134	-17.1134
2586	40.48204	5053.0	4957.2397	95.7603
2587	40.49635	5054.0	5040.5658	13.4342
2588	40.51066	5154.0	5070.7732	83.2268
2589	40.52496	5032.0	5024.1142	7.8858
2590	40.53927	5089.0	4920.328	168.672
2591	40.55358	5080.0	4814.9796	265.0204
2592	40.56788	4996.0	4748.1246	247.8754
2593	40.58219	4848.0	4719.2012	128.7988
2594	40.59650	4861.0	4703.5898	157.4102
2595	40.61080	4770.0	4676.8612	93.1388
2596	40.62511	4806.0	4624.5067	181.4933
2597	40.63941	4745.0	4548.8105	196.1895
2598	40.65372	4826.0	4472.3068	353.6932
2599	40.66803	4789.0	4418.4807	370.5193
2600	40.68233	4829.0	4392.6899	436.3101
2601	40.69664	4736.0	4381.4454	354.5546
2602	40.71095	4849.0	4372.2719	476.7281
2603	40.72525	4779.0	4367.0596	411.9404
2604	40.73956	4722.0	4380.153	341.847
2605	40.75387	4725.0	4429.0104	295.9896
2606	40.76817	4792.0	4522.3145	269.6855
2607	40.78248	4894.0	4665.3354	228.6646
2608	40.79678	5152.0	4854.1727	297.8273
2609	40.81109	5092.0	5061.1461	30.8539
2610	40.82540	5200.0	5230.1107	-30.1107
2611	40.83970	5106.0	5312.8846	-206.8846
2612	40.85401	5036.0	5317.2287	-281.2287
2613	40.86832	5028.0	5294.7778	-266.7778
2614	40.88262	5087.0	5282.0075	-195.0075
2615	40.89693	4805.0	5288.5772	-483.5772
2616	40.91124	5019.0	5322.1084	-303.1084
2617	40.92554	4845.0	5386.756	-541.756
2618	40.93985	4920.0	5471.3853	-551.3853
2619	40.95416	4977.0	5557.3404	-580.3404
2620	40.96846	4956.0	5630.5196	-674.5196
2621	40.98277	4902.0	5680.1965	-778.1965
2622	40.99707	4951.0	5683.9869	-732.9869
2623	41.01138	4945.0	5609.1627	-664.1627
2624	41.02569	4969.0	5450.5345	-481.5345
2625	41.03999	4965.0	5257.1709	-292.1709
2626	41.05430	4861.0	5093.5097	-232.5097
2627	41.06861	4805.0	4989.0293	-184.0293
2628	41.08291	4614.0	4935.9203	-321.9203
2629	41.09722	4653.0	4910.5569	-257.5569
2630	41.11153	4724.0	4883.2775	-159.2775
2631	41.12583	4765.0	4827.8221	-62.8221
2632	41.14014	4811.0	4746.5562	64.4438
2633	41.15444	4776.0	4671.3847	104.6153
2634	41.16875	4769.0	4638.3411	130.6589
2635	41.18306	4745.0	4666.911	78.089
2636	41.19736	4951.0	4760.196	190.804
2637	41.21167	5070.0	4905.6119	164.3881
2638	41.22598	4988.0	5074.5601	-86.5601
2639	41.24028	5207.0	5233.6186	-26.6186
2640	41.25459	5058.0	5366.287	-308.287
2641	41.26890	5131.0	5476.6082	-345.6082
2642	41.28320	5083.0	5565.0577	-482.0577
2643	41.29751	5385.0	5621.4014	-236.4014
2644	41.31182	5379.0	5632.2448	-253.2448
2645	41.32612	5266.0	5586.1328	-320.1328
2646	41.34043	5141.0	5488.1842	-347.1842
2647	41.35473	5123.0	5372.5751	-249.5751
2648	41.36904	5089.0	5279.6451	-190.6451
2649	41.38335	4905.0	5227.6709	-322.6709
2650	41.39765	4861.0	5212.3619	-351.3619
2651	41.41196	4971.0	5214.389	-243.389
2652	41.42627	4897.0	5203.5989	-306.5989
2653	41.44057	4958.0	5143.4357	-185.4357
2654	41.45488	4948.0	5016.0335	-68.0335
2655	41.46919	4809.0	4845.7614	-36.7614
2656	41.48349	4607.0	4682.1269	-75.1269
2657	41.49780	4641.0	4562.689	78.311
2658	41.51210	4681.0	4497.3421	183.6579
2659	41.52641	4732.0	4477.9042	254.0958
2660	41.54072	4728.0	4485.9106	242.0894
2661	41.55502	4629.0	4499.466	129.534
2662	41.56933	4878.0	4506.2283	371.7717
2663	41.58364	4768.0	4514.0659	253.9341
2664	41.59794	4798.0	4545.6585	252.3415
2665	41.61225	4768.0	4616.8604	151.1396
2666	41.62656	4529.0	4730.1633	-201.1633
2667	41.64086	4876.0	4872.4221	3.5779
2668	41.65517	4848.0	5022.8127	-174.8127
2669	41.66948	5079.0	5178.0257	-99.0257
2670	41.68378	5201.0	5370.4302	-169.4302
2671	41.69809	5156.0	5650.6847	-494.6847
2672	41.71239	5469.0	6054.4276	-585.4276
2673	41.72670	5778.0	6576.0979	-798.0979
2674	41.74101	6322.0	7146.0276	-824.0276
2675	41.75531	6779.0	7648.5278	-869.5278
2676	41.76962	7341.0	8015.3192	-674.3192
2677	41.78393	8023.0	8280.5038	-257.5038
2678	41.79823	8902.0	8487.7837	414.2163
2679	41.81254	8950.0	8601.0312	348.9688
2680	41.82685	8441.0	8548.2887	-107.2887
2681	41.84115	7673.0	8317.1692	-644.1692
2682	41.85546	7288.0	7980.1268	-692.1268
2683	41.86976	7193.0	7620.233	-427.233
2684	41.88407	7027.0	7287.3441	-260.3441
2685	41.89838	7014.0	7006.2005	7.7995
2686	41.91268	7023.0	6763.843	259.157
2687	41.92699	6853.0	6508.5901	344.4099
2688	41.94130	6312.0	6192.1752	119.8248
2689	41.95560	5952.0	5817.1707	134.8293
2690	41.96991	5572.0	5435.3648	136.6352
2691	41.98422	5352.0	5097.833	254.167
2692	41.99852	5183.0	4824.2442	358.7558
2693	42.01283	4818.0	4612.6285	205.3715
2694	42.02714	4783.0	4454.5644	328.4356
2695	42.04144	4876.0	4340.9916	535.0084
2696	42.05575	4685.0	4264.2829	420.7171
2697	42.07005	4687.0	4219.1132	467.8868
2698	42.08436	4535.0	4201.6961	333.3039
2699	42.09867	4624.0	4207.7702	416.2298
2700	42.11297	4597.0	4228.4185	368.5815
2701	42.12728	4558.0	4247.9871	310.0129
2702	42.14159	4469.0	4250.1039	218.8961
2703	42.15589	4529.0	4231.9663	297.0337
2704	42.17020	4496.0	4210.0945	285.9055
2705	42.18451	4411.0	4204.2378	206.7622
2706	42.19881	4481.0	4226.1737	254.8263
2707	42.21312	4584.0	4280.2872	303.7128
2708	42.22742	4611.0	4367.2811	243.7189
2709	42.24173	4652.0	4486.9688	165.0312
2710	42.25604	4689.0	4643.0841	45.9159
2711	42.27034	4673.0	4848.4571	-175.4571
2712	42.28465	5026.0	5115.6209	-89.6209
2713	42.29896	5131.0	5426.4165	-295.4165
2714	42.31326	5217.0	5704.3983	-487.3983
2715	42.32757	5511.0	5842.4098	-331.4098
2716	42.34188	5507.0	5806.6408	-299.6408
2717	42.35618	5288.0	5692.2902	-404.2902
2718	42.37049	5334.0	5629.2448	-295.2448
2719	42.38480	5306.0	5682.8426	-376.8426
2720	42.39910	5409.0	5835.1623	-426.1623
2721	42.41341	5693.0	5995.7644	-302.7644
2722	42.42771	5686.0	6038.9206	-352.9206
2723	42.44202	5513.0	5895.3831	-382.3831
2724	42.45633	5378.0	5615.219	-237.219
2725	42.47063	5079.0	5314.2125	-235.2125
2726	42.48494	5092.0	5078.6174	13.3826
2727	42.49925	4952.0	4932.665	19.335
2728	42.51355	4975.0	4852.7038	122.2962
2729	42.52786	4954.0	4788.2918	165.7082
2730	42.54217	4895.0	4690.3257	204.6743
2731	42.55647	4858.0	4547.3513	310.6487
2732	42.57078	4684.0	4389.2321	294.7679
2733	42.58508	4608.0	4250.1789	357.8211
2734	42.59939	4550.0	4143.9278	406.0722
2735	42.61370	4522.0	4066.2318	455.7682
2736	42.62800	4590.0	4006.1146	583.8854
2737	42.64231	4385.0	3954.3284	430.6716
2738	42.65662	4527.0	3906.5894	620.4106
2739	42.67092	4354.0	3864.0365	489.9635
2740	42.68523	4336.0	3828.1448	507.8552
2741	42.69954	4368.0	3800.899	567.101
2742	42.71384	4390.0	3782.1419	607.8581
2743	42.72815	4373.0	3769.5571	603.4429
2744	42.74246	4369.0	3760.3975	608.6025
2745	42.75676	4407.0	3753.4118	653.5882
2746	42.77107	4362.0	3748.955	613.045
2747	42.78537	4391.0	3745.5483	645.4517
2748	42.79968	4430.0	3739.249	690.751
2749	42.81399	4320.0	3727.607	592.393
2750	42.82829	4292.0	3712.8717	579.1283
2751	42.84260	4390.0	3699.4626	690.5374
2752	42.85691	4391.0	3690.707	700.293
2753	42.87121	4264.0	3687.2981	576.7019
2754	42.88552	4329.0	3688.1606	640.8394
2755	42.89983	4341.0	3691.2776	649.7224
2756	42.91413	4278.0	3694.7238	583.2762
2757	42.92844	4229.0	3697.7957	531.2043
2758	42.94274	4342.0	3702.8233	639.1767
2759	42.95705	4336.0	3711.8502	624.1498
2760	42.97136	4329.0	3727.3264	601.6736
2761	42.98566	4411.0	3750.2631	660.7369
2762	42.99997	4332.0	3778.0302	553.9698
2763	43.01428	4311.0	3804.7775	506.2225
2764	43.02858	4354.0	3823.616	530.384
2765	43.04289	4331.0	3833.9595	497.0405
2766	43.05720	4277.0	3844.1555	432.8445
2767	43.07150	4496.0	3864.3334	631.6666
2768	43.08581	4554.0	3899.8262	654.1738
2769	43.10012	4439.0	3948.8093	490.1907
2770	43.11442	4507.0	4005.1236	501.8764
2771	43.12873	4532.0	4064.9947	467.0053
2772	43.14303	4521.0	4129.3813	391.6187
2773	43.15734	4391.0	4199.5697	191.4303
2774	43.17165	4420.0	4265.3741	154.6259
2775	43.18595	4416.0	4307.4848	108.5152
2776	43.20026	4313.0	4323.0563	-10.0563
2777	43.21457	4489.0	4332.4496	156.5504
2778	43.22887	4463.0	4355.2367	107.7633
2779	43.24318	4378.0	4387.1234	-9.1234
2780	43.25749	4572.0	4406.6765	165.3235
2781	43.27179	4436.0	4398.82	37.18
2782	43.28610	4448.0	4367.9135	80.0865
2783	43.30040	4498.0	4325.1322	172.8678
2784	43.31471	4681.0	4277.5833	403.4167
2785	43.32902	4624.0	4230.5936	393.4064
2786	43.34332	4479.0	4187.5808	291.4192
2787	43.35763	4594.0	4149.3946	444.6054
2788	43.37194	4569.0	4110.265	458.735
2789	43.38624	4622.0	4066.5487	555.4513
2790	43.40055	4528.0	4022.4574	505.5426
2791	43.41486	4609.0	3986.5873	622.4127
2792	43.42916	4515.0	3963.5544	551.4456
2793	43.44347	4600.0	3951.7782	648.2218
2794	43.45778	4567.0	3949.4497	617.5503
2795	43.47208	4554.0	3955.5934	598.4066
2796	43.48639	4640.0	3966.844	673.156
2797	43.50069	4553.0	3976.4481	576.5519
2798	43.51500	4611.0	3979.2127	631.7873
2799	43.52931	4587.0	3978.2953	608.7047
2800	43.54361	4579.0	3982.1248	596.8752
2801	43.55792	4640.0	3998.5048	641.4952
2802	43.57223	4571.0	4032.0824	538.9176
2803	43.58653	4615.0	4086.2062	528.7938
2804	43.60084	4814.0	4163.6428	650.3572
2805	43.61515	4894.0	4266.9376	627.0624
2806	43.62945	4923.0	4401.0349	521.9651
2807	43.64376	5041.0	4571.6765	469.3235
2808	43.65806	5313.0	4775.1268	537.8732
2809	43.67237	5393.0	4976.9404	416.0596
2810	43.68668	5397.0	5112.9906	284.0094
2811	43.70098	5457.0	5129.348	327.652
2812	43.71529	5423.0	5035.8666	387.1334
2813	43.72960	5285.0	4900.1557	384.8443
2814	43.74390	5335.0	4791.3899	543.6101
2815	43.75821	5181.0	4744.2159	436.7841
2816	43.77252	5381.0	4757.4546	623.5454
2817	43.78682	5272.0	4805.0158	466.9842
2818	43.80113	5235.0	4846.2388	388.7612
2819	43.81544	5217.0	4847.7461	369.2539
2820	43.82974	5228.0	4808.6658	419.3342
2821	43.84405	5061.0	4759.8235	301.1765
2822	43.85835	4981.0	4736.0709	244.9291
2823	43.87266	5139.0	4754.5539	384.4461
2824	43.88697	4902.0	4812.9719	89.0281
2825	43.90127	5030.0	4905.9825	124.0175
2826	43.91558	5088.0	5029.283	58.717
2827	43.92989	5087.0	5176.5678	-89.5678
2828	43.94419	5152.0	5343.3615	-191.3615
2829	43.95850	5278.0	5537.6474	-259.6474
2830	43.97281	5508.0	5778.9933	-270.9933
2831	43.98711	5772.0	6092.1816	-320.1816
2832	44.00142	6069.0	6475.6759	-406.6759
2833	44.01572	6594.0	6863.4077	-269.4077
2834	44.03003	7048.0	7129.8622	-81.8622
2835	44.04434	7058.0	7181.1395	-123.1395
2836	44.05864	6970.0	7043.4305	-73.4305
2837	44.07295	6645.0	6830.976	-185.976
2838	44.08726	6246.0	6657.889	-411.889
2839	44.10156	6088.0	6596.3057	-508.3057
2840	44.11587	6146.0	6672.8363	-526.8363
2841	44.13018	6246.0	6862.0523	-616.0523
2842	44.14448	6345.0	7087.7812	-742.7812
2843	44.15879	6557.0	7266.7571	-709.7571
2844	44.17310	6617.0	7372.6091	-755.6091
2845	44.18740	6444.0	7441.8132	-997.8132
2846	44.20171	6488.0	7525.6319	-1037.6319
2847	44.21601	6350.0	7657.9949	-1307.9949
2848	44.23032	6358.0	7843.7064	-1485.7064
2849	44.24463	6358.0	8039.9592	-1681.9592
2850	44.25893	6261.0	8161.4508	-1900.4508
2851	44.27324	6159.0	8137.6827	-1978.6827
2852	44.28755	6139.0	7966.3429	-1827.3429
2853	44.30185	6046.0	7696.1554	-1650.1554
2854	44.31616	6127.0	7395.375	-1268.375
2855	44.33047	6002.0	7126.4672	-1124.4672
2856	44.34477	5804.0	6916.9149	-1112.9149
2857	44.35908	5667.0	6751.9724	-1084.9724
2858	44.37338	5518.0	6593.5858	-1075.5858
2859	44.38769	5428.0	6407.1805	-979.1805
2860	44.40200	5305.0	6184.0706	-879.0706
2861	44.41630	5248.0	5938.0986	-690.0986
2862	44.43061	5113.0	5690.3809	-577.3809
2863	44.44492	5147.0	5459.4417	-312.4417
2864	44.45922	5039.0	5256.0078	-217.0078
2865	44.47353	4949.0	5087.8913	-138.8913
2866	44.48784	4878.0	4966.8858	-88.8858
2867	44.50214	4949.0	4903.7271	45.2729
2868	44.51645	4744.0	4901.2205	-157.2205
2869	44.53076	4792.0	4952.7983	-160.7983
2870	44.54506	4956.0	5041.3213	-85.3213
2871	44.55937	4936.0	5143.239	-207.239
2872	44.57367	5059.0	5240.0598	-181.0598
2873	44.58798	4917.0	5317.9321	-400.9321
2874	44.60229	4939.0	5347.7588	-408.7588
2875	44.61659	4911.0	5296.5638	-385.5638
2876	44.63090	4823.0	5172.6645	-349.6645
2877	44.64521	4910.0	5029.3839	-119.3839
2878	44.65951	4967.0	4915.3567	51.6433
2879	44.67382	4923.0	4845.1788	77.8212
2880	44.68813	4827.0	4810.2582	16.7418
2881	44.70243	4860.0	4795.1807	64.8193
2882	44.71674	4896.0	4777.7734	118.2266
2883	44.73104	4835.0	4733.4909	101.5091
2884	44.74535	4909.0	4655.1291	253.8709
2885	44.75966	4777.0	4561.6586	215.3414
2886	44.77396	4728.0	4480.6017	247.3983
2887	44.78827	4780.0	4428.8262	351.1738
2888	44.80258	4704.0	4410.9813	293.0187
2889	44.81688	4689.0	4426.8596	262.1404
2890	44.83119	4795.0	4477.6441	317.3559
2891	44.84550	4865.0	4567.598	297.402
2892	44.85980	5120.0	4703.8802	416.1198
2893	44.87411	5100.0	4891.8646	208.1354
2894	44.88842	5352.0	5129.4583	222.5417
2895	44.90272	5619.0	5407.3472	211.6528
2896	44.91703	5874.0	5714.7224	159.2776
2897	44.93133	6283.0	6032.2395	250.7605
2898	44.94564	6716.0	6298.279	417.721
2899	44.95995	6594.0	6413.0722	180.9278
2900	44.97425	6494.0	6335.0131	158.9869
2901	44.98856	6402.0	6147.8803	254.1197
2902	45.00287	5986.0	5977.3036	8.6964
2903	45.01717	6059.0	5891.5598	167.4402
2904	45.03148	5823.0	5896.451	-73.451
2905	45.04579	5827.0	5972.7795	-145.7795
2906	45.06009	5944.0	6081.6272	-137.6272
2907	45.07440	6072.0	6154.4983	-82.4983
2908	45.08870	6010.0	6129.911	-119.911
2909	45.10301	5901.0	6014.6194	-113.6194
2910	45.11732	5701.0	5867.7003	-166.7003
2911	45.13162	5566.0	5725.9307	-159.9307
2912	45.14593	5335.0	5587.8361	-252.8361
2913	45.16024	5265.0	5457.6904	-192.6904
2914	45.17454	5261.0	5362.18	-101.18
2915	45.18885	5217.0	5324.6593	-107.6593
2916	45.20316	5186.0	5344.1441	-158.1441
2917	45.21746	5106.0	5402.6515	-296.6515
2918	45.23177	5032.0	5475.5631	-443.5631
2919	45.24608	5126.0	5537.6515	-411.6515
2920	45.26038	5110.0	5578.1619	-468.1619
2921	45.27469	5222.0	5613.4605	-391.4605
2922	45.28899	5294.0	5674.2289	-380.2289
2923	45.30330	5413.0	5776.6183	-363.6183
2924	45.31761	5882.0	5894.307	-12.307
2925	45.33191	6010.0	5961.8147	48.1853
2926	45.34622	6233.0	5930.5462	302.4538
2927	45.36053	6038.0	5817.4613	220.5387
2928	45.37483	5782.0	5678.0205	103.9795
2929	45.38914	5494.0	5556.9853	-62.9853
2930	45.40345	5284.0	5480.9512	-196.9512
2931	45.41775	5398.0	5466.1187	-68.1187
2932	45.43206	5447.0	5513.4882	-66.4882
2933	45.44636	5479.0	5604.2933	-125.2933
2934	45.46067	5772.0	5715.8357	56.1643
2935	45.47498	5696.0	5845.953	-149.953
2936	45.48928	5727.0	5999.9782	-272.9782
2937	45.50359	5874.0	6147.9729	-273.9729
2938	45.51790	5839.0	6217.1062	-378.1062
2939	45.53220	5912.0	6154.6677	-242.6677
2940	45.54651	5716.0	5992.071	-276.071
2941	45.56082	5610.0	5818.1268	-208.1268
2942	45.57512	5642.0	5702.3696	-60.3696
2943	45.58943	5401.0	5670.3233	-269.3233
2944	45.60374	5527.0	5723.7844	-196.7844
2945	45.61804	5390.0	5841.25	-451.25
2946	45.63235	5666.0	5966.4846	-300.4846
2947	45.64665	5646.0	6018.2274	-372.2274
2948	45.66096	5825.0	5935.6211	-110.6211
2949	45.67527	5585.0	5734.5058	-149.5058
2950	45.68957	5567.0	5495.7419	71.2581
2951	45.70388	5326.0	5295.301	30.699
2952	45.71819	5150.0	5167.739	-17.739
2953	45.73249	5064.0	5117.5221	-53.5221
2954	45.74680	5178.0	5130.0132	47.9868
2955	45.76111	5113.0	5168.535	-55.535
2956	45.77541	5281.0	5177.6967	103.3033
2957	45.78972	5222.0	5115.2772	106.7228
2958	45.80402	5321.0	4991.821	329.179
2959	45.81833	4883.0	4857.8693	25.1307
2960	45.83264	4976.0	4753.2879	222.7121
2961	45.84694	4947.0	4684.9566	262.0434
2962	45.86125	4992.0	4640.1483	351.8517
2963	45.87556	4766.0	4607.0369	158.9631
2964	45.88986	4813.0	4580.6709	232.3291
2965	45.90417	4782.0	4557.7778	224.2222
2966	45.91848	4871.0	4536.1853	334.8147
2967	45.93278	4909.0	4518.305	390.695
2968	45.94709	4824.0	4508.7528	315.2472
2969	45.96140	4759.0	4505.212	253.788
2970	45.97570	4799.0	4497.6636	301.3364
2971	45.99001	4911.0	4472.0587	438.9413
2972	46.00431	4722.0	4426.8396	295.1604
2973	46.01862	4870.0	4378.2466	491.7534
2974	46.03293	4745.0	4345.2637	399.7363
2975	46.04723	4745.0	4336.9099	408.0901
2976	46.06154	4761.0	4352.5537	408.4463
2977	46.07585	4690.0	4386.7329	303.2671
2978	46.09015	4807.0	4432.5576	374.4424
2979	46.10446	4863.0	4484.6952	378.3048
2980	46.11877	4843.0	4543.4628	299.5372
2981	46.13307	4864.0	4616.948	247.052
2982	46.14738	4633.0	4711.2077	-78.2077
2983	46.16168	4701.0	4814.3355	-113.3355
2984	46.17599	4844.0	4893.2761	-49.2761
2985	46.19030	4843.0	4913.1947	-70.1947
2986	46.20460	4689.0	4869.9373	-180.9373
2987	46.21891	4749.0	4797.6925	-48.6925
2988	46.23322	4679.0	4740.1915	-61.1915
2989	46.24752	4762.0	4726.2257	35.7743
2990	46.26183	4794.0	4767.7273	26.2727
2991	46.27614	4803.0	4864.3955	-61.3955
2992	46.29044	4899.0	5005.3384	-106.3384
2993	46.30475	4910.0	5170.626	-260.626
2994	46.31906	4905.0	5335.8795	-430.8795
2995	46.33336	5065.0	5468.7774	-403.7774
2996	46.34767	5183.0	5526.3459	-343.3459
2997	46.36197	5049.0	5479.7299	-430.7299
2998	46.37628	5164.0	5353.6037	-189.6037
2999	46.39059	5021.0	5216.6995	-195.6995
3000	46.40489	5068.0	5130.7237	-62.7237
3001	46.41920	5053.0	5122.6065	-69.6065
3002	46.43351	5173.0	5193.2453	-20.2453
3003	46.44781	5162.0	5329.385	-167.385
3004	46.46212	5244.0	5507.4991	-263.4991
3005	46.47643	5277.0	5698.5231	-421.5231
3006	46.49073	5489.0	5877.0531	-388.0531
3007	46.50504	5556.0	6024.1235	-468.1235
3008	46.51934	5519.0	6123.5189	-604.5189
3009	46.53365	5568.0	6178.1003	-610.1003
3010	46.54796	5759.0	6217.4465	-458.4465
3011	46.56226	5747.0	6260.1223	-513.1223
3012	46.57657	5730.0	6298.1532	-568.1532
3013	46.59088	6024.0	6338.434	-314.434
3014	46.60518	6032.0	6430.6177	-398.6177
3015	46.61949	6166.0	6626.3856	-460.3856
3016	46.63380	6473.0	6925.5096	-452.5096
3017	46.64810	6866.0	7260.9728	-394.9728
3018	46.66241	7158.0	7517.4318	-359.4318
3019	46.67672	7099.0	7585.2175	-486.2175
3020	46.69102	7050.0	7440.0703	-390.0703
3021	46.70533	6739.0	7165.2159	-426.2159
3022	46.71963	6754.0	6883.9862	-129.9862
3023	46.73394	6687.0	6699.6936	-12.6936
3024	46.74825	6719.0	6663.5981	55.4019
3025	46.76255	6920.0	6764.2699	155.7301
3026	46.77686	7112.0	6935.979	176.021
3027	46.79117	7036.0	7079.2613	-43.2613
3028	46.80547	7076.0	7098.7538	-22.7538
3029	46.81978	7133.0	6949.3123	183.6877
3030	46.83409	6940.0	6661.3592	278.6408
3031	46.84839	6648.0	6314.9533	333.0467
3032	46.86270	6507.0	5988.0809	518.9191
3033	46.87700	6320.0	5727.9662	592.0338
3034	46.89131	6146.0	5547.9261	598.0739
3035	46.90562	6052.0	5436.1684	615.8316
3036	46.91992	6122.0	5367.5748	754.4252
3037	46.93423	6067.0	5312.0358	754.9642
3038	46.94854	5906.0	5242.5416	663.4584
3039	46.96284	5731.0	5149.8196	581.1804
3040	46.97715	5840.0	5045.1221	794.8779
3041	46.99146	5662.0	4943.3771	718.6229
3042	47.00576	5466.0	4850.8698	615.1302
3043	47.02007	5328.0	4763.8591	564.1409
3044	47.03438	5336.0	4679.5062	656.4938
3045	47.04868	5300.0	4597.0179	702.9821
3046	47.06299	5200.0	4520.4511	679.5489
3047	47.07729	5078.0	4459.4847	618.5153
3048	47.09160	5028.0	4421.5696	606.4304
3049	47.10591	4943.0	4403.9792	539.0208
3050	47.12021	4967.0	4393.2396	573.7604
3051	47.13452	4903.0	4374.3572	528.6428
3052	47.14883	4854.0	4340.8399	513.1601
3053	47.16313	4836.0	4297.1494	538.8506
3054	47.17744	4727.0	4250.5529	476.4471
3055	47.19175	4826.0	4207.7918	618.2082
3056	47.20605	4942.0	4175.4375	766.5625
3057	47.22036	4778.0	4156.2527	621.7473
3058	47.23466	4786.0	4149.1904	636.8096
3059	47.24897	4758.0	4150.1903	607.8097
3060	47.26328	4765.0	4156.4429	608.5571
3061	47.27758	4704.0	4169.8603	534.1397
3062	47.29189	4685.0	4196.1326	488.8674
3063	47.30620	4898.0	4241.9304	656.0696
3064	47.32050	4791.0	4312.8874	478.1126
3065	47.33481	4849.0	4412.5845	436.4155
3066	47.34912	4866.0	4537.8289	328.1711
3067	47.36342	4965.0	4675.5368	289.4632
3068	47.37773	5071.0	4801.2379	269.7621
3069	47.39204	5001.0	4889.5379	111.4621
3070	47.40634	5271.0	4932.785	338.215
3071	47.42065	5120.0	4956.1505	163.8495
3072	47.43495	5085.0	5003.2436	81.7564
3073	47.44926	5094.0	5101.7462	-7.7462
3074	47.46357	5247.0	5240.1924	6.8076
3075	47.47787	5431.0	5365.8953	65.1047
3076	47.49218	5401.0	5416.6739	-15.6739
3077	47.50649	5313.0	5372.7503	-59.7503
3078	47.52079	5287.0	5269.4313	17.5687
3079	47.53510	5064.0	5157.2434	-93.2434
3080	47.54941	5014.0	5072.1918	-58.1918
3081	47.56371	5134.0	5035.4536	98.5464
3082	47.57802	5062.0	5055.2579	6.7421
3083	47.59232	5118.0	5124.8024	-6.8024
3084	47.60663	5124.0	5223.0077	-99.0077
3085	47.62094	5175.0	5326.3803	-151.3803
3086	47.63524	5042.0	5421.0546	-379.0546
3087	47.64955	5032.0	5489.5587	-457.5587
3088	47.66386	5074.0	5493.8261	-419.8261
3089	47.67816	4983.0	5407.2303	-424.2303
3090	47.69247	5164.0	5255.532	-91.532
3091	47.70678	5055.0	5096.4924	-41.4924
3092	47.72108	4882.0	4975.9233	-93.9233
3093	47.73539	4908.0	4915.8811	-7.8811
3094	47.74970	4979.0	4921.2918	57.7082
3095	47.76400	4978.0	4983.691	-5.691
3096	47.77831	4886.0	5075.9593	-189.9593
3097	47.79261	4942.0	5154.6581	-212.6581
3098	47.80692	4944.0	5184.1523	-240.1523
3099	47.82123	5007.0	5163.8374	-156.8374
3100	47.83553	5237.0	5114.6592	122.3408
3101	47.84984	5214.0	5045.8226	168.1774
3102	47.86415	5169.0	4954.3419	214.6581
3103	47.87845	5152.0	4851.5588	300.4412
3104	47.89276	5148.0	4765.1399	382.8601
3105	47.90707	5131.0	4713.8605	417.1395
3106	47.92137	5000.0	4695.5471	304.4529
3107	47.93568	4989.0	4692.6431	296.3569
3108	47.94998	5002.0	4685.8724	316.1276
3109	47.96429	5021.0	4666.2481	354.7519
3110	47.97860	4937.0	4633.3783	303.6217
3111	47.99290	4952.0	4590.6232	361.3768
3112	48.00721	4844.0	4545.6453	298.3547
3113	48.02152	4885.0	4509.287	375.713
3114	48.03582	4926.0	4489.2239	436.7761
3115	48.05013	4696.0	4490.8723	205.1277
3116	48.06444	4939.0	4516.5802	422.4198
3117	48.07874	4780.0	4566.8385	213.1615
3118	48.09305	5015.0	4639.4959	375.5041
3119	48.10736	5075.0	4726.2383	348.7617
3120	48.12166	4979.0	4807.8777	171.1223
3121	48.13597	4913.0	4865.1526	47.8474
3122	48.15027	5175.0	4902.5523	272.4477
3123	48.16458	5077.0	4951.2153	125.7847
3124	48.17889	5055.0	5039.9019	15.0981
3125	48.19319	5246.0	5167.3443	78.6557
3126	48.20750	5127.0	5291.5713	-164.5713
3127	48.22181	5119.0	5353.044	-234.044
3128	48.23611	5274.0	5329.1255	-55.1255
3129	48.25042	5315.0	5254.0366	60.9634
3130	48.26473	5244.0	5171.4891	72.5109
3131	48.27903	5415.0	5100.9554	314.0446
3132	48.29334	5297.0	5045.227	251.773
3133	48.30764	5300.0	5002.7279	297.2721
3134	48.32195	5075.0	4969.0985	105.9015
3135	48.33626	5147.0	4932.5671	214.4329
3136	48.35056	5021.0	4877.8202	143.1798
3137	48.36487	5166.0	4799.9624	366.0376
3138	48.37918	5060.0	4717.0738	342.9262
3139	48.39348	5192.0	4653.6832	538.3168
3140	48.40779	5141.0	4617.0635	523.9365
3141	48.42210	5186.0	4595.7629	590.2371
3142	48.43640	4989.0	4571.5223	417.4777
3143	48.45071	4963.0	4533.004	429.996
3144	48.46502	5034.0	4485.3602	548.6398
3145	48.47932	4997.0	4445.4626	551.5374
3146	48.49363	4956.0	4430.4896	525.5104
3147	48.50793	4928.0	4451.1218	476.8782
3148	48.52224	4915.0	4513.0082	401.9918
3149	48.53655	4906.0	4616.926	289.074
3150	48.55085	4945.0	4750.8425	194.1575
3151	48.56516	4920.0	4880.5402	39.4598
3152	48.57947	5035.0	4953.0676	81.9324
3153	48.59377	4907.0	4931.3348	-24.3348
3154	48.60808	4894.0	4829.6305	64.3695
3155	48.62239	4855.0	4701.8372	153.1628
3156	48.63669	4902.0	4596.448	305.552
3157	48.65100	4912.0	4535.0454	376.9546
3158	48.66530	4755.0	4519.2975	235.7025
3159	48.67961	4762.0	4540.0135	221.9865
3160	48.69392	4835.0	4579.0389	255.9611
3161	48.70822	4637.0	4611.2964	25.7036
3162	48.72253	4705.0	4617.363	87.637
3163	48.73684	4732.0	4600.0524	131.9476
3164	48.75114	4568.0	4582.8306	-14.8306
3165	48.76545	4828.0	4591.1466	236.8534
3166	48.77976	4809.0	4637.5113	171.4887
3167	48.79406	4785.0	4717.6099	67.3901
3168	48.80837	5029.0	4809.6885	219.3115
3169	48.82268	4890.0	4885.0759	4.9241
3170	48.83698	4983.0	4925.4641	57.5359
3171	48.85129	4982.0	4934.0318	47.9682
3172	48.86559	5342.0	4927.1442	414.8558
3173	48.87990	4995.0	4924.9613	70.0387
3174	48.89421	4900.0	4944.8355	-44.8355
3175	48.90851	4973.0	4995.7755	-22.7755
3176	48.92282	4978.0	5075.637	-97.637
3177	48.93713	4946.0	5167.6994	-221.6994
3178	48.95143	5024.0	5241.5965	-217.5965
3179	48.96574	5150.0	5268.5454	-118.5454
3180	48.98005	5081.0	5248.0705	-167.0705
3181	48.99435	5182.0	5212.4475	-30.4475
3182	49.00866	5070.0	5195.7465	-125.7465
3183	49.02296	5050.0	5204.9156	-154.9156
3184	49.03727	4969.0	5216.6316	-247.6316
3185	49.05158	5099.0	5198.9717	-99.9717
3186	49.06588	5074.0	5144.3155	-70.3155
3187	49.08019	4956.0	5073.2857	-117.2857
3188	49.09450	4971.0	5009.9456	-38.9456
3189	49.10880	5196.0	4968.372	227.628
3190	49.12311	4982.0	4961.5901	20.4099
3191	49.13742	5130.0	5000.124	129.876
3192	49.15172	5068.0	5079.6838	-11.6838
3193	49.16603	5089.0	5176.5537	-87.5537
3194	49.18034	5175.0	5258.2973	-83.2973
3195	49.19464	5184.0	5304.263	-120.263
3196	49.20895	5194.0	5313.5982	-119.5982
3197	49.22325	5222.0	5293.1981	-71.1981
3198	49.23756	5272.0	5254.6361	17.3639
3199	49.25187	5236.0	5225.64	10.36
3200	49.26617	5248.0	5243.0962	4.9038
3201	49.28048	5246.0	5330.9302	-84.9302
3202	49.29479	5247.0	5487.5858	-240.5858
3203	49.30909	5464.0	5680.9972	-216.9972
3204	49.32340	5537.0	5849.0137	-312.0137
3205	49.33771	5440.0	5925.1917	-485.1917
3206	49.35201	5281.0	5888.1841	-607.1841
3207	49.36632	5394.0	5778.1437	-384.1437
3208	49.38062	5183.0	5661.581	-478.581
3209	49.39493	5155.0	5586.5293	-431.5293
3210	49.40924	5291.0	5575.2949	-284.2949
3211	49.42354	5242.0	5637.9809	-395.9809
3212	49.43785	5241.0	5771.2701	-530.2701
3213	49.45216	5481.0	5938.437	-457.437
3214	49.46646	5466.0	6063.2579	-597.2579
3215	49.48077	5456.0	6071.7157	-615.7157
3216	49.49508	5525.0	5960.4101	-435.4101
3217	49.50938	5331.0	5800.6457	-469.6457
3218	49.52369	5270.0	5662.7585	-392.7585
3219	49.53800	5169.0	5565.7969	-396.7969
3220	49.55230	5178.0	5493.9155	-315.9155
3221	49.56661	5156.0	5435.3929	-279.3929
3222	49.58091	5020.0	5396.1956	-376.1956
3223	49.59522	5212.0	5381.1772	-169.1772
3224	49.60953	5322.0	5379.9316	-57.9316
3225	49.62383	5318.0	5380.8719	-62.8719
3226	49.63814	5307.0	5387.688	-80.688
3227	49.65245	5232.0	5405.2976	-173.2976
3228	49.66675	5128.0	5420.1038	-292.1038
3229	49.68106	5174.0	5407.2936	-233.2936
3230	49.69537	5080.0	5353.4795	-273.4795
3231	49.70967	4980.0	5264.8202	-284.8202
3232	49.72398	5118.0	5151.8422	-33.8422
3233	49.73828	5082.0	5027.0427	54.9573
3234	49.75259	5137.0	4911.7172	225.2828
3235	49.76690	4889.0	4824.198	64.802
3236	49.78120	4956.0	4767.2606	188.7394
3237	49.79551	4960.0	4730.7847	229.2153
3238	49.80982	4839.0	4700.5454	138.4546
3239	49.82412	4880.0	4667.3353	212.6647
3240	49.83843	4841.0	4628.8339	212.1661
3241	49.85274	4791.0	4583.6218	207.3782
3242	49.86704	4789.0	4530.6194	258.3806
3243	49.88135	4859.0	4475.7334	383.2666
3244	49.89566	4802.0	4429.1741	372.8259
3245	49.90996	4818.0	4399.7317	418.2683
3246	49.92427	4656.0	4391.8953	264.1047
3247	49.93857	4660.0	4407.0678	252.9322
3248	49.95288	4878.0	4444.4625	433.5375
3249	49.96719	4723.0	4499.7712	223.2288
3250	49.98149	4787.0	4563.6141	223.3859
3251	49.99580	4740.0	4623.8474	116.1526
3252	50.01011	4881.0	4677.9683	203.0317
3253	50.02441	4997.0	4741.2598	255.7402
3254	50.03872	4705.0	4837.6419	-132.6419
3255	50.05303	4870.0	4989.0305	-119.0305
3256	50.06733	5000.0	5213.7575	-213.7575
3257	50.08164	5079.0	5524.8366	-445.8366
3258	50.09594	5358.0	5917.7328	-559.7328
3259	50.11025	5276.0	6346.9388	-1070.9388
3260	50.12456	5310.0	6716.7769	-1406.7769
3261	50.13886	5644.0	6925.3848	-1281.3848
3262	50.15317	5920.0	6939.4636	-1019.4636
3263	50.16748	5735.0	6808.1524	-1073.1524
3264	50.18178	5695.0	6605.4694	-910.4694
3265	50.19609	5578.0	6393.7409	-815.7409
3266	50.21040	5473.0	6228.8344	-755.8344
3267	50.22470	5422.0	6151.4327	-729.4327
3268	50.23901	5205.0	6161.0383	-956.0383
3269	50.25332	5457.0	6209.2003	-752.2003
3270	50.26762	5364.0	6224.607	-860.607
3271	50.28193	5472.0	6156.0853	-684.0853
3272	50.29623	5532.0	6001.6236	-469.6236
3273	50.31054	5350.0	5795.6109	-445.6109
3274	50.32485	5188.0	5576.6856	-388.6856
3275	50.33915	5053.0	5373.5717	-320.5717
3276	50.35346	5015.0	5206.6644	-191.6644
3277	50.36777	4915.0	5085.9408	-170.9408
3278	50.38207	4979.0	5010.3239	-31.3239
3279	50.39638	4947.0	4974.3021	-27.3021
3280	50.41069	5012.0	4974.9615	37.0385
3281	50.42499	4871.0	5014.23	-143.23
3282	50.43930	4850.0	5095.0798	-245.0798
3283	50.45360	4946.0	5210.278	-264.278
3284	50.46791	4841.0	5324.5643	-483.5643
3285	50.48222	4853.0	5380.7626	-527.7626
3286	50.49652	5032.0	5343.058	-311.058
3287	50.51083	5031.0	5228.6381	-197.6381
3288	50.52514	4891.0	5083.543	-192.543
3289	50.53944	4834.0	4947.5991	-113.5991
3290	50.55375	4753.0	4847.0624	-94.0624
3291	50.56806	4810.0	4794.6684	15.3316
3292	50.58236	4840.0	4788.4451	51.5549
3293	50.59667	4817.0	4811.4598	5.5402
3294	50.61098	4859.0	4834.1956	24.8044
3295	50.62528	4762.0	4828.7176	-66.7176
3296	50.63959	4800.0	4788.3143	11.6857
3297	50.65389	4822.0	4726.3065	95.6935
3298	50.66820	4909.0	4658.6251	250.3749
3299	50.68251	4855.0	4594.4946	260.5054
3300	50.69681	4858.0	4540.1811	317.8189
3301	50.71112	4990.0	4501.9041	488.0959
3302	50.72543	4981.0	4484.2196	496.7804
3303	50.73973	4927.0	4490.1413	436.8587
3304	50.75404	5068.0	4522.6434	545.3566
3305	50.76835	5083.0	4581.5734	501.4266
3306	50.78265	5149.0	4662.5475	486.4525
3307	50.79696	5114.0	4755.976	358.024
3308	50.81126	5090.0	4850.5981	239.4019
3309	50.82557	5138.0	4939.8446	198.1554
3310	50.83988	5112.0	5022.1957	89.8043
3311	50.85418	5250.0	5097.4316	152.5684
3312	50.86849	5327.0	5167.6391	159.3609
3313	50.88280	5203.0	5237.5543	-34.5543
3314	50.89710	5353.0	5313.2639	39.7361
3315	50.91141	5513.0	5403.8667	109.1333
3316	50.92572	5535.0	5521.1244	13.8756
3317	50.94002	5703.0	5662.7004	40.2996
3318	50.95433	5612.0	5797.996	-185.996
3319	50.96864	5731.0	5876.8294	-145.8294
3320	50.98294	5676.0	5859.2803	-183.2803
3321	50.99725	5600.0	5746.876	-146.876
3322	51.01155	5344.0	5580.7536	-236.7536
3323	51.02586	5232.0	5408.1123	-176.1123
3324	51.04017	5193.0	5260.8177	-67.8177
3325	51.05447	5311.0	5156.5856	154.4144
3326	51.06878	5228.0	5099.9377	128.0623
3327	51.08309	5189.0	5081.3137	107.6863
3328	51.09739	5211.0	5077.714	133.286
3329	51.11170	5183.0	5061.9093	121.0907
3330	51.12601	5198.0	5018.8535	179.1465
3331	51.14031	5038.0	4955.1346	82.8654
3332	51.15462	4937.0	4888.5153	48.4847
3333	51.16892	4862.0	4831.9173	30.0827
3334	51.18323	4916.0	4782.7575	133.2425
3335	51.19754	4871.0	4728.0957	142.9043
3336	51.21184	4868.0	4661.4227	206.5773
3337	51.22615	4774.0	4595.4006	178.5994
3338	51.24046	4809.0	4548.823	260.177
3339	51.25476	4764.0	4533.0448	230.9552
3340	51.26907	4905.0	4552.147	352.853
3341	51.28338	4901.0	4606.3444	294.6556
3342	51.29768	4870.0	4692.4666	177.5334
3343	51.31199	5002.0	4801.0224	200.9776
3344	51.32630	5027.0	4912.2917	114.7083
3345	51.34060	4908.0	4997.9798	-89.9798
3346	51.35491	5086.0	5029.8659	56.1341
3347	51.36921	5104.0	4994.8718	109.1282
3348	51.38352	5086.0	4908.4424	177.5576
3349	51.39783	5139.0	4808.9695	330.0305
3350	51.41213	5019.0	4733.094	285.906
3351	51.42644	5002.0	4699.5215	302.4785
3352	51.44075	4873.0	4711.3814	161.6186
3353	51.45505	4907.0	4764.6414	142.3586
3354	51.46936	4927.0	4849.7168	77.2832
3355	51.48367	4889.0	4950.6201	-61.6201
3356	51.49797	5032.0	5044.4039	-12.4039
3357	51.51228	4958.0	5106.7467	-148.7467
3358	51.52658	4930.0	5124.2649	-194.2649
3359	51.54089	4939.0	5103.8425	-164.8425
3360	51.55520	4859.0	5065.8685	-206.8685
3361	51.56950	5029.0	5028.7578	0.2422
3362	51.58381	4978.0	5003.5596	-25.5596
3363	51.59812	4960.0	4996.1503	-36.1503
3364	51.61242	4932.0	5010.6958	-78.6958
3365	51.62673	4945.0	5048.2917	-103.2917
3366	51.64104	4905.0	5099.423	-194.423
3367	51.65534	5000.0	5138.3622	-138.3622
3368	51.66965	4828.0	5139.5328	-311.5328
3369	51.68396	4845.0	5104.1537	-259.1537
3370	51.69826	4876.0	5059.0481	-183.0481
3371	51.71257	4801.0	5031.0677	-230.0677
3372	51.72687	4894.0	5027.9264	-133.9264
3373	51.74118	4805.0	5036.0554	-231.0554
3374	51.75549	4959.0	5032.8821	-73.8821
3375	51.76979	4879.0	5004.1652	-125.1652
3376	51.78410	4815.0	4952.1573	-137.1573
3377	51.79841	4794.0	4885.1039	-91.1039
3378	51.81271	4962.0	4811.196	150.804
3379	51.82702	4772.0	4743.0476	28.9524
3380	51.84133	4807.0	4697.2836	109.7164
3381	51.85563	4782.0	4684.7336	97.2664
3382	51.86994	4804.0	4704.2992	99.7008
3383	51.88424	4694.0	4744.9466	-50.9466
3384	51.89855	4941.0	4791.5874	149.4126
3385	51.91286	4888.0	4831.2892	56.7108
3386	51.92716	4795.0	4857.0775	-62.0775
3387	51.94147	4848.0	4868.8507	-20.8507
3388	51.95578	4738.0	4874.4034	-136.4034
3389	51.97008	4793.0	4882.7376	-89.7376
3390	51.98439	4742.0	4896.8169	-154.8169
3391	51.99870	4773.0	4917.0766	-144.0766
3392	52.01300	4857.0	4946.2058	-89.2058
3393	52.02731	4871.0	4990.7344	-119.7344
3394	52.04162	4891.0	5057.6841	-166.6841
3395	52.05592	5020.0	5143.0126	-123.0126
3396	52.07023	4870.0	5229.2079	-359.2079
3397	52.08453	4961.0	5302.7982	-341.7982
3398	52.09884	4833.0	5366.276	-533.276
3399	52.11315	4749.0	5413.4414	-664.4414
3400	52.12745	4894.0	5413.9092	-519.9092
3401	52.14176	4979.0	5342.6039	-363.6039
3402	52.15607	4905.0	5215.8659	-310.8659
3403	52.17037	4834.0	5078.4461	-244.4461
3404	52.18468	4969.0	4966.6169	2.3831
3405	52.19899	5055.0	4890.8523	164.1477
3406	52.21329	5010.0	4843.3007	166.6993
3407	52.22760	4874.0	4813.1996	60.8004
3408	52.24190	5010.0	4795.589	214.411
3409	52.25621	4863.0	4781.9638	81.0362
3410	52.27052	4998.0	4755.9092	242.0908
3411	52.28482	4825.0	4706.0543	118.9457
3412	52.29913	4880.0	4639.4418	240.5582
3413	52.31344	4989.0	4574.8572	414.1428
3414	52.32774	4960.0	4528.1682	431.8318
3415	52.34205	4948.0	4505.7923	442.2077
3416	52.35636	4856.0	4507.0873	348.9127
3417	52.37066	4981.0	4526.5161	454.4839
3418	52.38497	4918.0	4556.4286	361.5714
3419	52.39928	4955.0	4591.8442	363.1558
3420	52.41358	4994.0	4636.8343	357.1657
3421	52.42789	5067.0	4702.6369	364.3631
3422	52.44219	4883.0	4801.8632	81.1368
3423	52.45650	5059.0	4940.4333	118.5667
3424	52.47081	5251.0	5110.5208	140.4792
3425	52.48511	5162.0	5285.7024	-123.7024
3426	52.49942	5324.0	5429.2009	-105.2009
3427	52.51373	5240.0	5520.6128	-280.6128
3428	52.52803	5348.0	5570.6205	-222.6205
3429	52.54234	5419.0	5602.1977	-183.1977
3430	52.55665	5203.0	5618.114	-415.114
3431	52.57095	5233.0	5597.874	-364.874
3432	52.58526	5208.0	5535.531	-327.531
3433	52.59956	5133.0	5464.0966	-331.0966
3434	52.61387	5203.0	5423.7216	-220.7216
3435	52.62818	5192.0	5428.4991	-236.4991
3436	52.64248	5270.0	5470.2987	-200.2987
3437	52.65679	5112.0	5542.2707	-430.2707
3438	52.67110	5255.0	5649.1606	-394.1606
3439	52.68540	5231.0	5792.1769	-561.1769
3440	52.69971	5214.0	5945.0133	-731.0133
3441	52.71402	5124.0	6047.6842	-923.6842
3442	52.72832	5350.0	6044.8276	-694.8276
3443	52.74263	5290.0	5935.4763	-645.4763
3444	52.75694	5197.0	5770.8382	-573.8382
3445	52.77124	5129.0	5612.909	-483.909
3446	52.78555	5154.0	5507.8629	-353.8629
3447	52.79985	5219.0	5481.2709	-262.2709
3448	52.81416	5075.0	5542.9019	-467.9019
3449	52.82847	5249.0	5684.7332	-435.7332
3450	52.84277	5177.0	5870.0173	-693.0173
3451	52.85708	5184.0	6024.8039	-840.8039
3452	52.87139	5259.0	6065.9983	-806.9983
3453	52.88569	5324.0	5966.71	-642.71
3454	52.90000	5258.0	5781.1165	-523.1165
3455	52.91431	5364.0	5591.5304	-227.5304
3456	52.92861	5319.0	5455.146	-136.146
3457	52.94292	5369.0	5396.5961	-27.5961
3458	52.95722	5428.0	5421.2851	6.7149
3459	52.97153	5591.0	5527.3575	63.6425
3460	52.98584	5637.0	5703.5003	-66.5003
3461	53.00014	5750.0	5920.2516	-170.2516
3462	53.01445	5986.0	6122.217	-136.217
3463	53.02876	5958.0	6238.0897	-280.0897
3464	53.04306	6025.0	6211.7211	-186.7211
3465	53.05737	5999.0	6038.7509	-39.7509
3466	53.07168	5845.0	5777.8983	67.1017
3467	53.08598	5752.0	5512.3895	239.6105
3468	53.10029	5610.0	5301.0057	308.9943
3469	53.11460	5603.0	5164.5271	438.4729
3470	53.12890	5511.0	5100.2911	410.7089
3471	53.14321	5434.0	5095.9884	338.0116
3472	53.15751	5375.0	5128.8674	246.1326
3473	53.17182	5456.0	5162.1952	293.8048
3474	53.18613	5293.0	5153.4564	139.5436
3475	53.20043	5287.0	5079.6463	207.3537
3476	53.21474	5280.0	4954.5667	325.4333
3477	53.22905	5151.0	4815.1821	335.8179
3478	53.24335	5150.0	4693.0471	456.9529
3479	53.25766	4952.0	4602.2211	349.7789
3480	53.27197	4855.0	4543.2556	311.7444
3481	53.28627	4889.0	4509.2668	379.7332
3482	53.30058	4826.0	4489.7426	336.2574
3483	53.31488	4847.0	4473.3954	373.6046
3484	53.32919	4702.0	4453.8887	248.1113
3485	53.34350	4796.0	4432.1032	363.8968
3486	53.35780	4846.0	4413.122	432.878
3487	53.37211	4750.0	4401.3249	348.6751
3488	53.38642	4746.0	4399.3677	346.6323
3489	53.40072	4702.0	4408.7367	293.2633
3490	53.41503	4707.0	4432.0982	274.9018
3491	53.42934	4832.0	4472.6133	359.3867
3492	53.44364	4759.0	4532.2496	226.7504
3493	53.45795	4879.0	4612.5295	266.4705
3494	53.47226	4821.0	4714.8469	106.1531
3495	53.48656	4945.0	4838.2425	106.7575
3496	53.50087	4896.0	4975.2092	-79.2092
3497	53.51517	4980.0	5107.1793	-127.1793
3498	53.52948	4887.0	5205.8325	-318.8325
3499	53.54379	4994.0	5240.3785	-246.3785
3500	53.55809	4979.0	5197.6637	-218.6637
3501	53.57240	4881.0	5097.0401	-216.0401
3502	53.58671	4922.0	4983.7711	-61.7711
3503	53.60101	4977.0	4897.7522	79.2478
3504	53.61532	4920.0	4856.346	63.654
3505	53.62963	4896.0	4858.6262	37.3738
3506	53.64393	4985.0	4893.5832	91.4168
3507	53.65824	5048.0	4946.4988	101.5012
3508	53.67254	5022.0	5002.5639	19.4361
3509	53.68685	4941.0	5048.5845	-107.5845
3510	53.70116	4762.0	5076.2328	-314.2328
3511	53.71546	4861.0	5089.4638	-228.4638
3512	53.72977	4997.0	5106.9874	-109.9874
3513	53.74408	4971.0	5155.0752	-184.0752
3514	53.75838	5098.0	5256.7299	-158.7299
3515	53.77269	5049.0	5421.0077	-372.0077
3516	53.78700	5029.0	5630.6719	-601.6719
3517	53.80130	5120.0	5832.888	-712.888
3518	53.81561	5117.0	5957.3067	-840.3067
3519	53.82992	5212.0	5970.8748	-758.8748
3520	53.84422	5142.0	5908.2906	-766.2906
3521	53.85853	5117.0	5824.3029	-707.3029
3522	53.87283	5019.0	5744.9148	-725.9148
3523	53.88714	5114.0	5676.2535	-562.2535
3524	53.90145	5120.0	5632.2872	-512.2872
3525	53.91575	5237.0	5625.9782	-388.9782
3526	53.93006	5245.0	5647.9558	-402.9558
3527	53.94437	5102.0	5668.6883	-566.6883
3528	53.95867	5273.0	5656.4774	-383.4774
3529	53.97298	5162.0	5595.1434	-433.1434
3530	53.98729	5211.0	5495.4536	-284.4536
3531	54.00159	5127.0	5378.43	-251.43
3532	54.01590	5037.0	5254.5285	-217.5285
3533	54.03020	4851.0	5127.8755	-276.8755
3534	54.04451	4881.0	5007.8101	-126.8101
3535	54.05882	4973.0	4905.9456	67.0544
3536	54.07312	4880.0	4824.4656	55.5344
3537	54.08743	4999.0	4758.734	240.266
3538	54.10174	4734.0	4706.3517	27.6483
3539	54.11604	4780.0	4669.4119	110.5881
3540	54.13035	4810.0	4651.0366	158.9634
3541	54.14466	4823.0	4652.5231	170.4769
3542	54.15896	4842.0	4673.0292	168.9708
3543	54.17327	4800.0	4712.2829	87.7171
3544	54.18758	4712.0	4768.2064	-56.2064
3545	54.20188	4811.0	4828.3093	-17.3093
3546	54.21619	4814.0	4867.3263	-53.3263
3547	54.23049	4607.0	4862.1248	-255.1248
3548	54.24480	4734.0	4815.4132	-81.4132
3549	54.25911	4823.0	4753.9069	69.0931
3550	54.27341	4868.0	4703.6705	164.3295
3551	54.28772	4688.0	4675.3404	12.6596
3552	54.30203	4718.0	4668.0162	49.9838
3553	54.31633	4729.0	4679.3918	49.6082
3554	54.33064	4798.0	4708.5404	89.4596
3555	54.34495	4820.0	4749.2813	70.7187
3556	54.35925	4812.0	4786.7588	25.2412
3557	54.37356	4612.0	4804.6021	-192.6021
3558	54.38786	4692.0	4800.5186	-108.5186
3559	54.40217	4779.0	4788.0469	-9.0469
3560	54.41648	4712.0	4781.808	-69.808
3561	54.43078	4694.0	4782.0759	-88.0759
3562	54.44509	4730.0	4773.9634	-43.9634
3563	54.45940	4870.0	4742.5848	127.4152
3564	54.47370	4611.0	4690.3356	-79.3356
3565	54.48801	4734.0	4634.3279	99.6721
3566	54.50232	4772.0	4589.9958	182.0042
3567	54.51662	4798.0	4563.7397	234.2603
3568	54.53093	4699.0	4556.8572	142.1428
3569	54.54524	4660.0	4570.7131	89.2869
3570	54.55954	4681.0	4606.203	74.797
3571	54.57385	4756.0	4659.4149	96.5851
3572	54.58815	4746.0	4719.75	26.25
3573	54.60246	4792.0	4774.8348	17.1652
3574	54.61677	4814.0	4822.9846	-8.9846
3575	54.63107	4865.0	4877.794	-12.794
3576	54.64538	4847.0	4954.2679	-107.2679
3577	54.65969	4788.0	5053.2251	-265.2251
3578	54.67399	5055.0	5150.7937	-95.7937
3579	54.68830	4890.0	5208.1377	-318.1377
3580	54.70261	5133.0	5208.1195	-75.1195
3581	54.71691	4933.0	5175.3134	-242.3134
3582	54.73122	4826.0	5145.9742	-319.9742
3583	54.74552	4889.0	5132.5141	-243.5141
3584	54.75983	4919.0	5125.2906	-206.2906
3585	54.77414	4941.0	5118.8766	-177.8766
3586	54.78844	4968.0	5126.3536	-158.3536
3587	54.80275	4963.0	5165.9054	-202.9054
3588	54.81706	4995.0	5237.8326	-242.8326
3589	54.83136	4960.0	5316.0863	-356.0863
3590	54.84567	5031.0	5359.5348	-328.5348
3591	54.85998	5028.0	5339.5168	-311.5168
3592	54.87428	5065.0	5261.4372	-196.4372
3593	54.88859	5109.0	5156.9733	-47.9733
3594	54.90290	4988.0	5055.099	-67.099
3595	54.91720	4959.0	4966.3382	-7.3382
3596	54.93151	4945.0	4891.2914	53.7086
3597	54.94581	4819.0	4832.9393	-13.9393
3598	54.96012	4861.0	4796.9705	64.0295
3599	54.97443	4846.0	4784.2541	61.7459
3600	54.98873	4912.0	4785.4925	126.5075
3601	55.00304	4858.0	4785.9249	72.0751
3602	55.01735	4864.0	4777.0588	86.9412
3603	55.03165	4943.0	4764.6803	178.3197
3604	55.04596	4814.0	4764.2869	49.7131
3605	55.06027	4883.0	4789.3241	93.6759
3606	55.07457	4939.0	4843.1533	95.8467
3607	55.08888	4877.0	4917.0089	-40.0089
3608	55.10318	4924.0	4991.9147	-67.9147
3609	55.11749	4950.0	5048.8724	-98.8724
3610	55.13180	4880.0	5086.3027	-206.3027
3611	55.14610	4807.0	5121.5661	-314.5661
3612	55.16041	4781.0	5167.2969	-386.2969
3613	55.17472	4818.0	5215.0336	-397.0336
3614	55.18902	4870.0	5248.9408	-378.9408
3615	55.20333	5012.0	5270.5766	-258.5766
3616	55.21764	4982.0	5298.1539	-316.1539
3617	55.23194	4855.0	5341.0789	-486.0789
3618	55.24625	4808.0	5383.3531	-575.3531
3619	55.26056	4938.0	5394.8425	-456.8425
3620	55.27486	4834.0	5357.1959	-523.1959
3621	55.28917	4992.0	5281.3032	-289.3032
3622	55.30347	4976.0	5193.2344	-217.2344
3623	55.31778	4835.0	5110.7968	-275.7968
3624	55.33209	4761.0	5036.2776	-275.2776
3625	55.34639	4811.0	4967.1241	-156.1241
3626	55.36070	4872.0	4905.8969	-33.8969
3627	55.37501	4859.0	4857.6258	1.3742
3628	55.38931	4793.0	4821.294	-28.294
3629	55.40362	4749.0	4788.4015	-39.4015
3630	55.41793	4734.0	4749.3676	-15.3676
3631	55.43223	4756.0	4700.8969	55.1031
3632	55.44654	4849.0	4647.9333	201.0667
3633	55.46084	4895.0	4598.8893	296.1107
3634	55.47515	4782.0	4559.853	222.147
3635	55.48946	4778.0	4535.784	242.216
3636	55.50376	4670.0	4529.7325	140.2675
3637	55.51807	4781.0	4543.2975	237.7025
3638	55.53238	4879.0	4577.447	301.553
3639	55.54668	4672.0	4632.5561	39.4439
3640	55.56099	4910.0	4705.8348	204.1652
3641	55.57530	4845.0	4791.8657	53.1343
3642	55.58960	4930.0	4889.4149	40.5851
3643	55.60391	5032.0	4999.0808	32.9192
3644	55.61822	5016.0	5116.3109	-100.3109
3645	55.63252	5122.0	5222.6492	-100.6492
3646	55.64683	5094.0	5295.5865	-201.5865
3647	55.66113	5183.0	5328.5711	-145.5711
3648	55.67544	5106.0	5335.2027	-229.2027
3649	55.68975	4963.0	5332.5516	-369.5516
3650	55.70405	5035.0	5336.3239	-301.3239
3651	55.71836	5008.0	5366.8374	-358.8374
3652	55.73267	5024.0	5444.6805	-420.6805
3653	55.74697	5040.0	5578.3676	-538.3676
3654	55.76128	5122.0	5755.2212	-633.2212
3655	55.77559	5109.0	5934.8377	-825.8377
3656	55.78989	5054.0	6060.0128	-1006.0128
3657	55.80420	5170.0	6093.7794	-923.7794
3658	55.81850	5089.0	6040.7028	-951.7028
3659	55.83281	5206.0	5922.1087	-716.1087
3660	55.84712	5223.0	5761.4567	-538.4567
3661	55.86142	5202.0	5596.2161	-394.2161
3662	55.87573	5079.0	5468.2879	-389.2879
3663	55.89004	5057.0	5402.3959	-345.3959
3664	55.90434	5019.0	5401.2437	-382.2437
3665	55.91865	5081.0	5449.1337	-368.1337
3666	55.93296	5104.0	5513.9042	-409.9042
3667	55.94726	5191.0	5556.1082	-365.1082
3668	55.96157	5249.0	5547.1518	-298.1518
3669	55.97588	5132.0	5479.4184	-347.4184
3670	55.99018	5157.0	5363.0158	-206.0158
3671	56.00449	5171.0	5221.642	-50.642
3672	56.01879	5053.0	5088.1482	-35.1482
3673	56.03310	5013.0	4988.012	24.988
3674	56.04741	5008.0	4932.4417	75.5583
3675	56.06171	4998.0	4923.1385	74.8615
3676	56.07602	4986.0	4956.5494	29.4506
3677	56.09033	4999.0	5024.8429	-25.8429
3678	56.10463	5133.0	5111.2488	21.7512
3679	56.11894	5090.0	5186.4984	-96.4984
3680	56.13325	5073.0	5215.5071	-142.5071
3681	56.14755	4909.0	5180.2494	-271.2494
3682	56.16186	4983.0	5097.1716	-114.1716
3683	56.17616	4973.0	5003.1874	-30.1874
3684	56.19047	4908.0	4927.6331	-19.6331
3685	56.20478	4920.0	4882.2341	37.7659
3686	56.21908	4864.0	4866.3322	-2.3322
3687	56.23339	4930.0	4876.6798	53.3202
3688	56.24770	4901.0	4912.9195	-11.9195
3689	56.26200	5046.0	4975.02	70.98
3690	56.27631	4858.0	5059.2775	-201.2775
3691	56.29062	4883.0	5158.3237	-275.3237
3692	56.30492	4928.0	5265.7616	-337.7616
3693	56.31923	5004.0	5374.4107	-370.4107
3694	56.33354	4996.0	5466.3299	-470.3299
3695	56.34784	4914.0	5512.9726	-598.9726
3696	56.36215	5104.0	5495.8374	-391.8374
3697	56.37645	4995.0	5423.6306	-428.6306
3698	56.39076	4885.0	5320.4215	-435.4215
3699	56.40507	4795.0	5207.4298	-412.4298
3700	56.41937	4865.0	5101.4366	-236.4366
3701	56.43368	4925.0	5018.9559	-93.9559
3702	56.44799	4990.0	4973.2247	16.7753
3703	56.46229	4750.0	4968.9984	-218.9984
3704	56.47660	4766.0	4998.5993	-232.5993
3705	56.49091	4797.0	5043.787	-246.787
3706	56.50521	4891.0	5082.7856	-191.7856
3707	56.51952	4973.0	5099.8669	-126.8669
3708	56.53382	4937.0	5088.0165	-151.0165
3709	56.54813	4842.0	5043.7649	-201.7649
3710	56.56244	4792.0	4972.3756	-180.3756
3711	56.57674	4816.0	4890.7584	-74.7584
3712	56.59105	4861.0	4819.6126	41.3874
3713	56.60536	4683.0	4772.4896	-89.4896
3714	56.61966	4804.0	4752.9154	51.0846
3715	56.63397	4763.0	4757.9983	5.0017
3716	56.64828	4824.0	4781.101	42.899
3717	56.66258	4802.0	4814.2403	-12.2403
3718	56.67689	4810.0	4846.4909	-36.4909
3719	56.69120	4879.0	4867.2111	11.7889
3720	56.70550	4822.0	4874.7323	-52.7323
3721	56.71981	4792.0	4877.2971	-85.2971
3722	56.73411	4899.0	4881.8784	17.1216
3723	56.74842	4815.0	4883.7058	-68.7058
3724	56.76273	4986.0	4872.0428	113.9572
3725	56.77703	4751.0	4845.8706	-94.8706
3726	56.79134	5019.0	4818.5517	200.4483
3727	56.80565	4766.0	4805.6606	-39.6606
3728	56.81995	4692.0	4814.5929	-122.5929
3729	56.83426	4931.0	4843.3863	87.6137
3730	56.84857	4936.0	4883.348	52.652
3731	56.86287	4968.0	4921.6437	46.3563
3732	56.87718	4946.0	4945.1516	0.8484
3733	56.89148	4884.0	4947.6263	-63.6263
3734	56.90579	5048.0	4934.3082	113.6918
3735	56.92010	4814.0	4917.3675	-103.3675
3736	56.93440	5039.0	4909.593	129.407
3737	56.94871	4802.0	4919.1185	-117.1185
3738	56.96302	5008.0	4943.6049	64.3951
3739	56.97732	4970.0	4969.6054	0.3946
3740	56.99163	4921.0	4984.6456	-63.6456
3741	57.00594	4996.0	4988.2969	7.7031
3742	57.02024	4974.0	4988.927	-14.927
3743	57.03455	5045.0	4996.1197	48.8803
3744	57.04886	4998.0	5019.4815	-21.4815
3745	57.06316	4976.0	5070.5537	-94.5537
3746	57.07747	4974.0	5157.0068	-183.0068
3747	57.09177	5183.0	5274.9276	-91.9276
3748	57.10608	5055.0	5405.8645	-350.8645
3749	57.12039	5247.0	5526.5931	-279.5931
3750	57.13469	5290.0	5623.5938	-333.5938
3751	57.14900	5228.0	5692.6385	-464.6385
3752	57.16331	5281.0	5730.4785	-449.4785
3753	57.17761	5407.0	5743.8205	-336.8205
3754	57.19192	5300.0	5758.247	-458.247
3755	57.20623	5261.0	5800.4617	-539.4617
3756	57.22053	5397.0	5873.4779	-476.4779
3757	57.23484	5317.0	5954.0688	-637.0688
3758	57.24914	5381.0	6014.9126	-633.9126
3759	57.26345	5550.0	6048.5729	-498.5729
3760	57.27776	5481.0	6065.0592	-584.0592
3761	57.29206	5293.0	6072.7081	-779.7081
3762	57.30637	5438.0	6068.719	-630.719
3763	57.32068	5467.0	6043.274	-576.274
3764	57.33498	5249.0	5985.8042	-736.8042
3765	57.34929	5360.0	5896.4506	-536.4506
3766	57.36360	5429.0	5794.4075	-365.4075
3767	57.37790	5279.0	5705.1212	-426.1212
3768	57.39221	5246.0	5641.7493	-395.7493
3769	57.40652	5363.0	5605.9154	-242.9154
3770	57.42082	5352.0	5600.8623	-248.8623
3771	57.43513	5493.0	5632.5025	-139.5025
3772	57.44943	5414.0	5695.343	-281.343
3773	57.46374	5413.0	5763.4952	-350.4952
3774	57.47805	5506.0	5798.5176	-292.5176
3775	57.49235	5474.0	5772.1506	-298.1506
3776	57.50666	5567.0	5683.1814	-116.1814
3777	57.52097	5451.0	5551.1478	-100.1478
3778	57.53527	5364.0	5401.523	-37.523
3779	57.54958	5412.0	5260.2674	151.7326
3780	57.56389	5378.0	5150.0473	227.9527
3781	57.57819	5333.0	5085.0344	247.9656
3782	57.59250	5210.0	5068.9372	141.0628
3783	57.60680	5412.0	5095.9787	316.0213
3784	57.62111	5340.0	5153.3281	186.6719
3785	57.63542	5121.0	5224.4704	-103.4704
3786	57.64972	5319.0	5298.0808	20.9192
3787	57.66403	5334.0	5375.1272	-41.1272
3788	57.67834	5304.0	5458.4554	-154.4554
3789	57.69264	5285.0	5539.5385	-254.5385
3790	57.70695	5278.0	5600.6945	-322.6945
3791	57.72126	5294.0	5635.3704	-341.3704
3792	57.73556	5352.0	5654.3965	-302.3965
3793	57.74987	5292.0	5663.4721	-371.4721
3794	57.76418	5142.0	5647.2723	-505.2723
3795	57.77848	5182.0	5587.7181	-405.7181
3796	57.79279	5217.0	5493.5154	-276.5154
3797	57.80709	5185.0	5401.065	-216.065
3798	57.82140	5132.0	5345.4189	-213.4189
3799	57.83571	5074.0	5337.5446	-263.5446
3800	57.85001	5188.0	5361.6853	-173.6853
3801	57.86432	5184.0	5385.2117	-201.2117
3802	57.87863	5061.0	5380.9823	-319.9823
3803	57.89293	5193.0	5344.8761	-151.8761
3804	57.90724	4991.0	5287.6529	-296.6529
3805	57.92155	5031.0	5213.04	-182.04
3806	57.93585	5187.0	5117.4105	69.5895
3807	57.95016	4999.0	5005.2741	-6.2741
3808	57.96446	4996.0	4894.233	101.767
3809	57.97877	5075.0	4802.4363	272.5637
3810	57.99308	5075.0	4737.7872	337.2128
3811	58.00738	4928.0	4696.522	231.478
3812	58.02169	4987.0	4667.7745	319.2255
3813	58.03600	4987.0	4640.072	346.928
3814	58.05030	4991.0	4607.8698	383.1302
3815	58.06461	4940.0	4571.7974	368.2026
3816	58.07892	4992.0	4535.5839	456.4161
3817	58.09322	4986.0	4502.8967	483.1033
3818	58.10753	4745.0	4477.2978	267.7022
3819	58.12184	4969.0	4462.5252	506.4748
3820	58.13614	4911.0	4461.8203	449.1797
3821	58.15045	4930.0	4478.0771	451.9229
3822	58.16475	4843.0	4512.1178	330.8822
3823	58.17906	5013.0	4561.7299	451.2701
3824	58.19337	5013.0	4619.9056	393.0944
3825	58.20767	4909.0	4673.3964	235.6036
3826	58.22198	5055.0	4708.2296	346.7704
3827	58.23629	5054.0	4721.1719	332.8281
3828	58.25059	5168.0	4721.8157	446.1843
3829	58.26490	4999.0	4722.0454	276.9546
3830	58.27921	4911.0	4729.5171	181.4829
3831	58.29351	4991.0	4749.253	241.747
3832	58.30782	5135.0	4782.5534	352.4466
3833	58.32212	5124.0	4820.7836	303.2164
3834	58.33643	5116.0	4844.9315	271.0685
3835	58.35074	4968.0	4840.2556	127.7444
3836	58.36504	5063.0	4808.5192	254.4808
3837	58.37935	5100.0	4761.6957	338.3043
3838	58.39366	5097.0	4711.8683	385.1317
3839	58.40796	5060.0	4668.4516	391.5484
3840	58.42227	5011.0	4636.9952	374.0048
3841	58.43658	5107.0	4617.6189	489.3811
3842	58.45088	5014.0	4606.8768	407.1232
3843	58.46519	5067.0	4600.9574	466.0426
3844	58.47950	5088.0	4596.1218	491.8782
3845	58.49380	4924.0	4587.1683	336.8317
3846	58.50811	5054.0	4569.5552	484.4448
3847	58.52241	4916.0	4543.9796	372.0204
3848	58.53672	5085.0	4516.0333	568.9667
3849	58.55103	4944.0	4491.6608	452.3392
3850	58.56533	4963.0	4475.372	487.628
3851	58.57964	4968.0	4470.7138	497.2862
3852	58.59395	4932.0	4479.6713	452.3287
3853	58.60825	5041.0	4500.7485	540.2515
3854	58.62256	5046.0	4528.8847	517.1153
3855	58.63687	4875.0	4553.7836	321.2164
3856	58.65117	4824.0	4562.1356	261.8644
3857	58.66548	4919.0	4548.2933	370.7067
3858	58.67978	4939.0	4520.5596	418.4404
3859	58.69409	4877.0	4492.559	384.441
3860	58.70840	4940.0	4474.009	465.991
3861	58.72270	4956.0	4469.2016	486.7984
3862	58.73701	4938.0	4479.6897	458.3103
3863	58.75132	5179.0	4505.696	673.304
3864	58.76562	4922.0	4546.2329	375.7671
3865	58.77993	5086.0	4596.8236	489.1764
3866	58.79424	5151.0	4650.9358	500.0642
3867	58.80854	5008.0	4703.2047	304.7953
3868	58.82285	4998.0	4753.7853	244.2147
3869	58.83716	5196.0	4808.3167	387.6833
3870	58.85146	5065.0	4870.0221	194.9779
3871	58.86577	5059.0	4927.8323	131.1677
3872	58.88007	5182.0	4959.4836	222.5164
3873	58.89438	5119.0	4952.2099	166.7901
3874	58.90869	5098.0	4918.7883	179.2117
3875	58.92299	5099.0	4885.8975	213.1025
3876	58.93730	5039.0	4872.2257	166.7743
3877	58.95161	5120.0	4881.9596	238.0404
3878	58.96591	5258.0	4911.0836	346.9164
3879	58.98022	5170.0	4955.4151	214.5849
3880	58.99453	5348.0	5012.2599	335.7401
3881	59.00883	5265.0	5075.3301	189.6699
3882	59.02314	5276.0	5133.5789	142.4211
3883	59.03744	5230.0	5175.5618	54.4382
3884	59.05175	5182.0	5192.9873	-10.9873
3885	59.06606	5236.0	5179.4662	56.5338
3886	59.08036	5357.0	5135.6784	221.3216
3887	59.09467	5268.0	5074.5039	193.4961
3888	59.10898	5138.0	5018.9174	119.0826
3889	59.12328	5193.0	4988.585	204.415
3890	59.13759	5218.0	4991.7834	226.2166
3891	59.15190	5338.0	5026.4512	311.5488
3892	59.16620	5304.0	5079.8096	224.1904
3893	59.18051	5377.0	5130.7784	246.2216
3894	59.19482	5324.0	5159.3166	164.6834
3895	59.20912	5271.0	5159.1409	111.8591
3896	59.22343	5346.0	5138.7013	207.2987
3897	59.23773	5178.0	5108.7163	69.2837
3898	59.25204	5135.0	5074.1924	60.8076
3899	59.26635	5164.0	5034.2455	129.7545
3900	59.28065	5255.0	4988.0291	266.9709
3901	59.29496	5139.0	4941.8364	197.1636
3902	59.30927	5190.0	4907.3362	282.6638
3903	59.32357	5152.0	4894.8425	257.1575
3904	59.33788	5228.0	4906.2563	321.7437
3905	59.35219	5198.0	4936.6883	261.3117
3906	59.36649	5198.0	4982.1434	215.8566
3907	59.38080	5188.0	5044.8071	143.1929
3908	59.39510	5364.0	5129.5643	234.4357
3909	59.40941	5380.0	5233.0592	146.9408
3910	59.42372	5342.0	5336.4342	5.5658
3911	59.43802	5291.0	5411.7162	-120.7162
3912	59.45233	5450.0	5442.3579	7.6421
3913	59.46664	5392.0	5432.9813	-40.9813
3914	59.48094	5364.0	5395.3122	-31.3122
3915	59.49525	5466.0	5336.556	129.444
3916	59.50956	5476.0	5262.7585	213.2415
3917	59.52386	5274.0	5184.4139	89.5861
3918	59.53817	5282.0	5118.1022	163.8978
3919	59.55248	5365.0	5081.0523	283.9477
3920	59.56678	5366.0	5081.4251	284.5749
3921	59.58109	5306.0	5113.9144	192.0856
3922	59.59539	5436.0	5161.79	274.21
3923	59.60970	5341.0	5203.153	137.847
3924	59.62401	5471.0	5223.5938	247.4062
3925	59.63831	5336.0	5222.318	113.682
3926	59.65262	5390.0	5206.593	183.407
3927	59.66693	5199.0	5183.4586	15.5414
3928	59.68123	5221.0	5155.164	65.836
3929	59.69554	5209.0	5122.4706	86.5294
3930	59.70985	5313.0	5093.1568	219.8432
3931	59.72415	5338.0	5082.9406	255.0594
3932	59.73846	5399.0	5105.6035	293.3965
3933	59.75276	5150.0	5162.8121	-12.8121
3934	59.76707	5200.0	5243.3746	-43.3746
3935	59.78138	5416.0	5332.3704	83.6296
3936	59.79568	5455.0	5422.931	32.069
3937	59.80999	5372.0	5516.0637	-144.0637
3938	59.82430	5498.0	5606.9996	-108.9996
3939	59.83860	5553.0	5677.7949	-124.7949
3940	59.85291	5482.0	5704.8199	-222.8199
3941	59.86722	5464.0	5673.6045	-209.6045
3942	59.88152	5411.0	5591.9016	-180.9016
3943	59.89583	5368.0	5490.6335	-122.6335
3944	59.91014	5321.0	5403.9776	-82.9776
3945	59.92444	5256.0	5347.7141	-91.7141
3946	59.93875	5300.0	5318.2786	-18.2786
3947	59.95305	5328.0	5306.3824	21.6176
3948	59.96736	5429.0	5303.1286	125.8714
3949	59.98167	5229.0	5296.4075	-67.4075
3950	59.99597	5316.0	5272.4317	43.5683
3951	60.01028	5355.0	5224.0255	130.9745
3952	60.02459	5349.0	5152.0689	196.9311
3953	60.03889	5243.0	5061.7761	181.2239
3954	60.05320	5335.0	4962.5178	372.4822
3955	60.06751	5203.0	4867.1715	335.8285
3956	60.08181	5259.0	4786.3377	472.6623
3957	60.09612	5124.0	4723.4091	400.5909
3958	60.11042	5192.0	4676.2931	515.7069
3959	60.12473	5069.0	4641.0282	427.9718
3960	60.13904	5213.0	4612.8519	600.1481
3961	60.15334	5163.0	4586.73	576.27
3962	60.16765	5104.0	4561.194	542.806
3963	60.18196	5035.0	4539.3594	495.6406
3964	60.19626	5195.0	4525.8618	669.1382
3965	60.21057	5160.0	4522.5101	637.4899
3966	60.22488	5043.0	4527.3485	515.6515
3967	60.23918	5179.0	4535.8355	643.1645
3968	60.25349	5133.0	4543.1524	589.8476
3969	60.26780	4981.0	4546.5673	434.4327
3970	60.28210	5147.0	4547.8347	599.1653
3971	60.29641	5102.0	4552.5201	549.4799
3972	60.31071	5106.0	4567.2726	538.7274
3973	60.32502	5131.0	4596.0309	534.9691
3974	60.33933	5133.0	4639.1193	493.8807
3975	60.35363	5134.0	4695.6279	438.3721
3976	60.36794	5084.0	4767.5782	316.4218
3977	60.38225	5189.0	4858.8275	330.1725
3978	60.39655	5151.0	4965.7931	185.2069
3979	60.41086	5177.0	5069.1907	107.8093
3980	60.42517	5012.0	5138.8957	-126.8957
3981	60.43947	5275.0	5152.827	122.173
3982	60.45378	5281.0	5111.9641	169.0359
3983	60.46808	5387.0	5034.1484	352.8516
3984	60.48239	5266.0	4942.8705	323.1295
3985	60.49670	5297.0	4859.206	437.794
3986	60.51100	5285.0	4796.1734	488.8266
3987	60.52531	5210.0	4758.6295	451.3705
3988	60.53962	5196.0	4747.6359	448.3641
3989	60.55392	5182.0	4762.9073	419.0927
3990	60.56823	5041.0	4800.0057	240.9943
3991	60.58254	5024.0	4847.943	176.057
3992	60.59684	5046.0	4892.8624	153.1376
3993	60.61115	5234.0	4925.2023	308.7977
3994	60.62546	5233.0	4942.7051	290.2949
3995	60.63976	5232.0	4946.0172	285.9828
3996	60.65407	5187.0	4938.1692	248.8308
3997	60.66837	5045.0	4927.6309	117.3691
3998	60.68268	5249.0	4926.358	322.642
3999	60.69699	5167.0	4940.3316	226.6684
4000	60.71129	5245.0	4963.1666	281.8334
4001	60.72560	5271.0	4980.3655	290.6345
4002	60.73991	5248.0	4977.9325	270.0675
4003	60.75421	5200.0	4950.0519	249.9481
4004	60.76852	5294.0	4902.5017	391.4983
4005	60.78283	5343.0	4849.5053	493.4947
4006	60.79713	5324.0	4804.2366	519.7634
4007	60.81144	5163.0	4772.8568	390.1432
4008	60.82574	5025.0	4755.8016	269.1984
4009	60.84005	5151.0	4752.835	398.165
4010	60.85436	5174.0	4766.2441	407.7559
4011	60.86866	5286.0	4797.5727	488.4273
4012	60.88297	5204.0	4843.8232	360.1768
4013	60.89728	5128.0	4897.9781	230.0219
4014	60.91158	5216.0	4950.2564	265.7436
4015	60.92589	5325.0	4990.666	334.334
4016	60.94020	5137.0	5011.7795	125.2205
4017	60.95450	5247.0	5010.5684	236.4316
4018	60.96881	5291.0	4987.5222	303.4778
4019	60.98312	5148.0	4950.3836	197.6164
4020	60.99742	5341.0	4914.7272	426.2728
4021	61.01173	5182.0	4896.1179	285.8821
4022	61.02603	5264.0	4901.1955	362.8045
4023	61.04034	5188.0	4925.7776	262.2224
4024	61.05465	5241.0	4958.7693	282.2307
4025	61.06895	5274.0	4986.6292	287.3708
4026	61.08326	5150.0	4994.4385	155.5615
4027	61.09757	5244.0	4972.9642	271.0358
4028	61.11187	5202.0	4926.2077	275.7923
4029	61.12618	5376.0	4866.163	509.837
4030	61.14049	5232.0	4802.0587	429.9413
4031	61.15479	5377.0	4740.5858	636.4142
4032	61.16910	5370.0	4688.8257	681.1743
4033	61.18340	5171.0	4652.3407	518.6593
4034	61.19771	5268.0	4632.26	635.74
4035	61.21202	5279.0	4624.6599	654.3401
4036	61.22632	5187.0	4623.0586	563.9414
4037	61.24063	5272.0	4620.6044	651.3956
4038	61.25494	5308.0	4611.4055	696.5945
4039	61.26924	5324.0	4593.5349	730.4651
4040	61.28355	5199.0	4571.1888	627.8112
4041	61.29786	5325.0	4550.9085	774.0915
4042	61.31216	5231.0	4536.6319	694.3681
4043	61.32647	5331.0	4527.8444	803.1556
4044	61.34078	5381.0	4523.101	857.899
4045	61.35508	5283.0	4524.0232	758.9768
4046	61.36939	5283.0	4535.0847	747.9153
4047	61.38369	5212.0	4561.6533	650.3467
4048	61.39800	5353.0	4607.1868	745.8132
4049	61.41231	5326.0	4671.186	654.814
4050	61.42661	5453.0	4747.4542	705.5458
4051	61.44092	5237.0	4821.9895	415.0105
4052	61.45523	5444.0	4877.7564	566.2436
4053	61.46953	5536.0	4907.2253	628.7747
4054	61.48384	5427.0	4921.3087	505.6913
4055	61.49815	5373.0	4940.691	432.309
4056	61.51245	5288.0	4980.0022	307.9978
4057	61.52676	5334.0	5041.8399	292.1601
4058	61.54106	5235.0	5117.3068	117.6932
4059	61.55537	5480.0	5188.611	291.389
4060	61.56968	5500.0	5236.9099	263.0901
4061	61.58398	5511.0	5251.0292	259.9708
4062	61.59829	5324.0	5230.2599	93.7401
4063	61.61260	5408.0	5182.5066	225.4934
4064	61.62690	5481.0	5121.4269	359.5731
4065	61.64121	5333.0	5060.6691	272.3309
4066	61.65552	5415.0	5011.1149	403.8851
4067	61.66982	5359.0	4980.9744	378.0256
4068	61.68413	5427.0	4976.6763	450.3237
4069	61.69844	5288.0	5001.2349	286.7651
4070	61.71274	5235.0	5053.2813	181.7187
4071	61.72705	5380.0	5123.8495	256.1505
4072	61.74135	5375.0	5196.5006	178.4994
4073	61.75566	5322.0	5248.5962	73.4038
4074	61.76997	5293.0	5256.6879	36.3121
4075	61.78427	5249.0	5209.2086	39.7914
4076	61.79858	5376.0	5118.099	257.901
4077	61.81289	5373.0	5011.7361	361.2639
4078	61.82719	5172.0	4914.4182	257.5818
4079	61.84150	5410.0	4835.6291	574.3709
4080	61.85581	5294.0	4775.0688	518.9312
4081	61.87011	5353.0	4730.7506	622.2494
4082	61.88442	5174.0	4702.8157	471.1843
4083	61.89872	5321.0	4692.9643	628.0357
4084	61.91303	5267.0	4700.3542	566.6458
4085	61.92734	5185.0	4717.6407	467.3593
4086	61.94164	5280.0	4731.0157	548.9843
4087	61.95595	5257.0	4726.474	530.526
4088	61.97026	5273.0	4698.7163	574.2837
4089	61.98456	5309.0	4655.115	653.885
4090	61.99887	5309.0	4608.3539	700.6461
4091	62.01318	5263.0	4568.3505	694.6495
4092	62.02748	5245.0	4538.8712	706.1288
4093	62.04179	5257.0	4520.1873	736.8127
4094	62.05610	5185.0	4512.3454	672.6546
4095	62.07040	5040.0	4516.8675	523.1325
4096	62.08471	5139.0	4536.4097	602.5903
4097	62.09901	5196.0	4573.5485	622.4515
4098	62.11332	5127.0	4630.3869	496.6131
4099	62.12763	5308.0	4707.3078	600.6922
4100	62.14193	5075.0	4800.243	274.757
4101	62.15624	5243.0	4897.2414	345.7586
4102	62.17055	5169.0	4976.9092	192.0908
4103	62.18485	5253.0	5016.3958	236.6042
4104	62.19916	5236.0	5005.4234	230.5766
4105	62.21347	5235.0	4955.3417	279.6583
4106	62.22777	5285.0	4892.4523	392.5477
4107	62.24208	5366.0	4842.8284	523.1716
4108	62.25638	5328.0	4822.6459	505.3541
4109	62.27069	5305.0	4838.4586	466.5414
4110	62.28500	5219.0	4891.0057	327.9943
4111	62.29930	5441.0	4976.1832	464.8168
4112	62.31361	5456.0	5085.0056	370.9944
4113	62.32792	5469.0	5198.997	270.003
4114	62.34222	5372.0	5290.6909	81.3091
4115	62.35653	5422.0	5333.4129	88.5871
4116	62.37084	5287.0	5316.5032	-29.5032
4117	62.38514	5512.0	5248.0244	263.9756
4118	62.39945	5421.0	5148.5916	272.4084
4119	62.41376	5347.0	5043.1303	303.8697
4120	62.42806	5375.0	4951.9881	423.0119
4121	62.44237	5264.0	4886.381	377.619
4122	62.45667	5301.0	4849.5456	451.4544
4123	62.47098	5407.0	4837.784	569.216
4124	62.48529	5363.0	4841.1208	521.8792
4125	62.49959	5359.0	4846.638	512.362
4126	62.51390	5424.0	4843.8763	580.1237
4127	62.52821	5396.0	4828.7267	567.2733
4128	62.54251	5306.0	4802.8044	503.1956
4129	62.55682	5319.0	4770.3833	548.6167
4130	62.57113	5417.0	4736.8805	680.1195
4131	62.58543	5244.0	4708.3943	535.6057
4132	62.59974	5234.0	4690.7226	543.2774
4133	62.61404	5376.0	4688.386	687.614
4134	62.62835	5505.0	4702.6642	802.3358
4135	62.64266	5349.0	4732.1621	616.8379
4136	62.65696	5344.0	4772.5632	571.4368
4137	62.67127	5367.0	4816.9668	550.0332
4138	62.68558	5328.0	4859.2766	468.7234
4139	62.69988	5430.0	4893.6028	536.3972
4140	62.71419	5351.0	4910.6284	440.3716
4141	62.72850	5241.0	4901.7318	339.2682
4142	62.74280	5372.0	4870.9377	501.0623
4143	62.75711	5275.0	4835.9123	439.0877
4144	62.77142	5298.0	4815.4225	482.5775
4145	62.78572	5466.0	4819.5075	646.4925
4146	62.80003	5293.0	4851.0467	441.9533
4147	62.81433	5303.0	4908.0551	394.9449
4148	62.82864	5274.0	4981.8555	292.1445
4149	62.84295	5366.0	5053.7397	312.2603
4150	62.85725	5218.0	5099.8505	118.1495
4151	62.87156	5183.0	5103.6427	79.3573
4152	62.88587	5297.0	5063.8874	233.1126
4153	62.90017	5238.0	4992.0807	245.9193
4154	62.91448	5277.0	4904.6021	372.3979
4155	62.92879	5200.0	4817.1766	382.8234
4156	62.94309	5252.0	4742.238	509.762
4157	62.95740	5234.0	4687.1929	546.8071
4158	62.97170	5133.0	4654.3699	478.6301
4159	62.98601	5175.0	4642.6219	532.3781
4160	63.00032	5216.0	4647.2753	568.7247
4161	63.01462	5127.0	4658.8887	468.1113
4162	63.02893	5156.0	4664.8415	491.1585
4163	63.04324	5097.0	4653.888	443.112
4164	63.05754	5133.0	4622.1637	510.8363
4165	63.07185	5147.0	4575.9043	571.0957
4166	63.08616	5212.0	4525.6266	686.3734
4167	63.10046	5238.0	4479.6283	758.3717
4168	63.11477	5163.0	4442.0574	720.9426
4169	63.12908	5101.0	4414.4473	686.5527
4170	63.14338	5225.0	4397.634	827.366
4171	63.15769	5160.0	4390.9771	769.0229
4172	63.17199	5149.0	4393.8689	755.1311
4173	63.18630	5105.0	4404.3807	700.6193
4174	63.20061	5137.0	4418.6365	718.3635
4175	63.21491	5135.0	4431.6156	703.3844
4176	63.22922	5179.0	4440.0288	738.9712
4177	63.24353	5253.0	4444.9005	808.0995
4178	63.25783	5229.0	4450.6344	778.3656
4179	63.27214	5188.0	4462.66	725.34
4180	63.28645	5289.0	4485.817	803.183
4181	63.30075	5140.0	4523.713	616.287
4182	63.31506	5116.0	4578.0776	537.9224
4183	63.32936	5129.0	4647.4209	481.5791
4184	63.34367	5175.0	4723.7045	451.2955
4185	63.35798	5151.0	4791.0108	359.9892
4186	63.37228	5183.0	4831.9268	351.0732
4187	63.38659	5116.0	4840.3027	275.6973
4188	63.40090	5092.0	4824.7403	267.2597
4189	63.41520	5145.0	4798.559	346.441
4190	63.42951	5266.0	4770.6662	495.3338
4191	63.44382	5166.0	4747.6607	418.3393
4192	63.45812	5183.0	4736.4101	446.5899
4193	63.47243	5158.0	4745.8417	412.1583
4194	63.48674	5017.0	4782.9404	234.0596
4195	63.50104	5118.0	4849.9619	268.0381
4196	63.51535	5112.0	4941.3377	170.6623
4197	63.52965	5172.0	5040.1048	131.8952
4198	63.54396	5065.0	5119.0176	-54.0176
4199	63.55827	5131.0	5152.5629	-21.5629
4200	63.57257	5199.0	5134.9982	64.0018
4201	63.58688	5154.0	5083.0551	70.9449
4202	63.60119	5067.0	5017.4714	49.5286
4203	63.61549	5175.0	4947.8336	227.1664
4204	63.62980	5163.0	4876.6012	286.3988
4205	63.64411	5145.0	4810.0764	334.9236
4206	63.65841	5052.0	4758.7327	293.2673
4207	63.67272	4998.0	4730.567	267.433
4208	63.68702	5029.0	4727.6483	301.3517
4209	63.70133	5106.0	4745.9406	360.0594
4210	63.71564	5050.0	4776.3611	273.6389
4211	63.72994	5094.0	4806.5883	287.4117
4212	63.74425	5020.0	4827.0777	192.9223
4213	63.75856	5118.0	4835.8981	282.1019
4214	63.77286	5143.0	4835.4091	307.5909
4215	63.78717	5018.0	4825.3697	192.6303
4216	63.80148	4986.0	4801.9002	184.0998
4217	63.81578	5022.0	4763.6466	258.3534
4218	63.83009	5028.0	4717.1642	310.8358
4219	63.84440	5026.0	4674.5562	351.4438
4220	63.85870	5027.0	4645.7157	381.2843
4221	63.87301	5043.0	4635.2506	407.7494
4222	63.88731	4988.0	4645.0773	342.9227
4223	63.90162	5062.0	4676.4466	385.5534
4224	63.91593	4788.0	4729.2904	58.7096
4225	63.93023	4966.0	4799.3272	166.6728
4226	63.94454	5104.0	4874.0943	229.9057
4227	63.95885	5142.0	4932.8763	209.1237
4228	63.97315	4952.0	4957.0675	-5.0675
4229	63.98746	5113.0	4944.6737	168.3263
4230	64.00177	5055.0	4912.9058	142.0942
4231	64.01607	4983.0	4883.7456	99.2544
4232	64.03038	5073.0	4868.606	204.394
4233	64.04468	5064.0	4864.4978	199.5022
4234	64.05899	4931.0	4859.181	71.819
4235	64.07330	4948.0	4841.5442	106.4558
4236	64.08760	4903.0	4811.8933	91.1067
4237	64.10191	5044.0	4781.1913	262.8087
4238	64.11622	4874.0	4759.826	114.174
4239	64.13052	4959.0	4748.579	210.421
4240	64.14483	4979.0	4740.8588	238.1412
4241	64.15914	4997.0	4731.0781	265.9219
4242	64.17344	5027.0	4721.0464	305.9536
4243	64.18775	5027.0	4717.8409	309.1591
4244	64.20206	5060.0	4726.0911	333.9089
4245	64.21636	5081.0	4742.3116	338.6884
4246	64.23067	5039.0	4756.0628	282.9372
4247	64.24497	4990.0	4756.7471	233.2529
4248	64.25928	5107.0	4740.6985	366.3015
4249	64.27359	5039.0	4713.2291	325.7709
4250	64.28789	4976.0	4683.117	292.883
4251	64.30220	4923.0	4658.1986	264.8014
4252	64.31651	5035.0	4644.677	390.323
4253	64.33081	4983.0	4647.5753	335.4247
4254	64.34512	4997.0	4670.7492	326.2508
4255	64.35943	4970.0	4716.1832	253.8168
4256	64.37373	4899.0	4782.8609	116.1391
4257	64.38804	5159.0	4865.6988	293.3012
4258	64.40234	5095.0	4952.5104	142.4896
4259	64.41665	5062.0	5023.5295	38.4705
4260	64.43096	5063.0	5058.7433	4.2567
4261	64.44526	5053.0	5052.9312	0.0688
4262	64.45957	4958.0	5021.7	-63.7
4263	64.47388	5124.0	4989.929	134.071
4264	64.48818	5080.0	4975.8146	104.1854
4265	64.50249	5169.0	4985.7004	183.2996
4266	64.51680	5086.0	5017.0483	68.9517
4267	64.53110	5018.0	5062.6723	-44.6723
4268	64.54541	5041.0	5113.5566	-72.5566
4269	64.55972	5189.0	5164.1053	24.8947
4270	64.57402	5089.0	5215.6254	-126.6254
4271	64.58833	5048.0	5269.3394	-221.3394
4272	64.60263	5085.0	5314.2146	-229.2146
4273	64.61694	4988.0	5328.1643	-340.1643
4274	64.63125	4989.0	5297.4167	-308.4167
4275	64.64555	4980.0	5230.0118	-250.0118
4276	64.65986	5051.0	5146.0866	-95.0866
4277	64.67417	5062.0	5063.7836	-1.7836
4278	64.68847	4875.0	4994.9903	-119.9903
4279	64.70278	5029.0	4945.306	83.694
4280	64.71709	4881.0	4914.2339	-33.2339
4281	64.73139	4965.0	4898.1599	66.8401
4282	64.74570	5032.0	4894.8145	137.1855
4283	64.76000	5052.0	4905.1322	146.8678
4284	64.77431	4978.0	4928.8814	49.1186
4285	64.78862	4887.0	4959.7594	-72.7594
4286	64.80292	4945.0	4986.5448	-41.5448
4287	64.81723	5008.0	5000.6435	7.3565
4288	64.83154	4849.0	4999.9262	-150.9262
4289	64.84584	4922.0	4987.2449	-65.2449
4290	64.86015	4920.0	4970.3718	-50.3718
4291	64.87446	5016.0	4960.0526	55.9474
4292	64.88876	4959.0	4961.9818	-2.9818
4293	64.90307	4908.0	4971.6572	-63.6572
4294	64.91738	5012.0	4979.1798	32.8202
4295	64.93168	4885.0	4977.3013	-92.3013
4296	64.94599	4920.0	4964.182	-44.182
4297	64.96029	5051.0	4944.1906	106.8094
4298	64.97460	5071.0	4927.8095	143.1905
4299	64.98891	4943.0	4926.0029	16.9971
4300	65.00321	5060.0	4943.9831	116.0169
4301	65.01752	4864.0	4977.5935	-113.5935
4302	65.03183	4929.0	5013.1543	-84.1543
4303	65.04613	4852.0	5033.4691	-181.4691
4304	65.06044	4934.0	5028.6126	-94.6126
4305	65.07475	4942.0	5000.518	-58.518
4306	65.08905	4820.0	4957.2599	-137.2599
4307	65.10336	4845.0	4906.6421	-61.6421
4308	65.11766	4883.0	4855.42	27.58
4309	65.13197	4977.0	4809.1802	167.8198
4310	65.14628	4770.0	4772.8043	-2.8043
4311	65.16058	4866.0	4750.933	115.067
4312	65.17489	4995.0	4745.3022	249.6978
4313	65.18920	4830.0	4752.5273	77.4727
4314	65.20350	4820.0	4764.8663	55.1337
4315	65.21781	4913.0	4774.6414	138.3586
4316	65.23212	4882.0	4778.2563	103.7437
4317	65.24642	4858.0	4777.0647	80.9353
4318	65.26073	4822.0	4776.4519	45.5481
4319	65.27504	4801.0	4782.356	18.644
4320	65.28934	4812.0	4796.4974	15.5026
4321	65.30365	4784.0	4812.9897	-28.9897
4322	65.31795	4879.0	4819.2637	59.7363
4323	65.33226	4884.0	4805.3998	78.6002
4324	65.34657	4753.0	4771.9371	-18.9371
4325	65.36087	4915.0	4727.0351	187.9649
4326	65.37518	4744.0	4679.9725	64.0275
4327	65.38949	4815.0	4637.8263	177.1737
4328	65.40379	4797.0	4605.158	191.842
4329	65.41810	4773.0	4584.9706	188.0294
4330	65.43241	4724.0	4578.2436	145.7564
4331	65.44671	4682.0	4584.029	97.971
4332	65.46102	4806.0	4601.5865	204.4135
4333	65.47532	4600.0	4630.1002	-30.1002
4334	65.48963	4686.0	4667.0689	18.9311
4335	65.50394	4721.0	4706.6677	14.3323
4336	65.51824	4771.0	4741.252	29.748
4337	65.53255	4672.0	4762.2652	-90.2652
4338	65.54686	4818.0	4761.3282	56.6718
4339	65.56116	4779.0	4736.3128	42.6872
4340	65.57547	4689.0	4696.9817	-7.9817
4341	65.58978	4738.0	4657.7167	80.2833
4342	65.60408	4636.0	4626.6779	9.3221
4343	65.61839	4685.0	4602.2605	82.7395
4344	65.63270	4678.0	4578.1711	99.8289
4345	65.64700	4771.0	4551.619	219.381
4346	65.66131	4607.0	4526.1281	80.8719
4347	65.67561	4736.0	4507.8719	228.1281
4348	65.68992	4720.0	4500.777	219.223
4349	65.70423	4791.0	4504.6365	286.3635
4350	65.71853	4750.0	4516.0126	233.9874
4351	65.73284	4725.0	4529.4873	195.5127
4352	65.74715	4636.0	4541.9266	94.0734
4353	65.76145	4812.0	4555.7928	256.2072
4354	65.77576	4638.0	4577.03	60.97
4355	65.79007	4622.0	4608.7297	13.2703
4356	65.80437	4783.0	4646.8254	136.1746
4357	65.81868	4722.0	4680.2651	41.7349
4358	65.83298	4770.0	4697.2613	72.7387
4359	65.84729	4672.0	4694.3357	-22.3357
4360	65.86160	4847.0	4677.1631	169.8369
4361	65.87590	4714.0	4652.5391	61.4609
4362	65.89021	4710.0	4622.5999	87.4001
4363	65.90452	4575.0	4589.6655	-14.6655
4364	65.91882	4667.0	4560.5013	106.4987
4365	65.93313	4753.0	4542.8768	210.1232
4366	65.94744	4725.0	4540.3856	184.6144
4367	65.96174	4642.0	4551.4136	90.5864
4368	65.97605	4580.0	4570.5892	9.4108
4369	65.99036	4624.0	4591.3064	32.6936
4370	66.00466	4659.0	4608.5833	50.4167
4371	66.01897	4659.0	4620.2905	38.7095
4372	66.03327	4608.0	4627.4668	-19.4668
4373	66.04758	4715.0	4632.7832	82.2168
4374	66.06189	4632.0	4636.2816	-4.2816
4375	66.07619	4871.0	4634.1725	236.8275
4376	66.09050	4715.0	4624.374	90.626
4377	66.10481	4601.0	4611.5778	-10.5778
4378	66.11911	4693.0	4604.6912	88.3088
4379	66.13342	4712.0	4610.7872	101.2128
4380	66.14773	4589.0	4631.6426	-42.6426
4381	66.16203	4666.0	4662.7802	3.2198
4382	66.17634	4722.0	4694.2573	27.7427
4383	66.19064	4694.0	4714.4586	-20.4586
4384	66.20495	4614.0	4718.0607	-104.0607
4385	66.21926	4653.0	4710.6196	-57.6196
4386	66.23356	4691.0	4702.0124	-11.0124
4387	66.24787	4771.0	4695.9597	75.0403
4388	66.26218	4612.0	4686.4168	-74.4168
4389	66.27648	4552.0	4665.6282	-113.6282
4390	66.29079	4624.0	4633.7852	-9.7852
4391	66.30510	4656.0	4600.1053	55.8947
4392	66.31940	4678.0	4575.324	102.676
4393	66.33371	4725.0	4565.2961	159.7039
4394	66.34802	4578.0	4570.5205	7.4795
4395	66.36232	4602.0	4586.6351	15.3649
4396	66.37663	4790.0	4605.1886	184.8114
4397	66.39093	4602.0	4618.752	-16.752
4398	66.40524	4491.0	4625.9517	-134.9517
4399	66.41955	4603.0	4631.3326	-28.3326
4400	66.43385	4581.0	4638.3724	-57.3724
4401	66.44816	4594.0	4644.301	-50.301
4402	66.46247	4563.0	4644.0361	-81.0361
4403	66.47677	4572.0	4635.2726	-63.2726
4404	66.49108	4618.0	4618.8191	-0.8191
4405	66.50539	4570.0	4596.1019	-26.1019
4406	66.51969	4692.0	4568.5747	123.4253
4407	66.53400	4670.0	4539.3793	130.6207
4408	66.54830	4593.0	4513.889	79.111
4409	66.56261	4435.0	4496.8506	-61.8506
4410	66.57692	4609.0	4490.9515	118.0485
4411	66.59122	4555.0	4496.9802	58.0198
4412	66.60553	4522.0	4515.5145	6.4855
4413	66.61984	4567.0	4546.5452	20.4548
4414	66.63414	4568.0	4587.6038	-19.6038
4415	66.64845	4623.0	4632.3288	-9.3288
4416	66.66276	4585.0	4670.0398	-85.0398
4417	66.67706	4574.0	4688.457	-114.457
4418	66.69137	4596.0	4680.2249	-84.2249
4419	66.70568	4675.0	4647.9394	27.0606
4420	66.71998	4529.0	4602.7476	-73.7476
4421	66.73429	4629.0	4557.8586	71.1414
4422	66.74859	4617.0	4523.5814	93.4186
4423	66.76290	4516.0	4505.4937	10.5063
4424	66.77721	4564.0	4504.8918	59.1082
4425	66.79151	4566.0	4519.79	46.21
4426	66.80582	4650.0	4545.0067	104.9933
4427	66.82013	4583.0	4572.5918	10.4082
4428	66.83443	4479.0	4595.2237	-116.2237
4429	66.84874	4557.0	4609.1101	-52.1101
4430	66.86305	4539.0	4615.2799	-76.2799
4431	66.87735	4577.0	4617.5734	-40.5734
4432	66.89166	4608.0	4620.7345	-12.7345
4433	66.90596	4529.0	4629.1985	-100.1985
4434	66.92027	4670.0	4644.3264	25.6736
4435	66.93458	4495.0	4662.8852	-167.8852
4436	66.94888	4498.0	4678.8381	-180.8381
4437	66.96319	4547.0	4687.7459	-140.7459
4438	66.97750	4613.0	4689.3851	-76.3851
4439	66.99180	4646.0	4685.7629	-39.7629
4440	67.00611	4612.0	4679.0309	-67.0309
4441	67.02042	4718.0	4671.1473	46.8527
4442	67.03472	4737.0	4663.3623	73.6377
4443	67.04903	4671.0	4656.3973	14.6027
4444	67.06334	4657.0	4651.0013	5.9987
4445	67.07764	4652.0	4648.2767	3.7233
4446	67.09195	4526.0	4651.608	-125.608
4447	67.10625	4605.0	4665.0505	-60.0505
4448	67.12056	4707.0	4691.1293	15.8707
4449	67.13487	4645.0	4729.3614	-84.3614
4450	67.14917	4658.0	4776.3895	-118.3895
4451	67.16348	4670.0	4826.0387	-156.0387
4452	67.17779	4630.0	4867.1013	-237.1013
4453	67.19209	4592.0	4886.9598	-294.9598
4454	67.20640	4583.0	4879.244	-296.244
4455	67.22071	4574.0	4850.3351	-276.3351
4456	67.23501	4538.0	4813.2595	-275.2595
4457	67.24932	4639.0	4778.9532	-139.9532
4458	67.26362	4519.0	4754.0562	-235.0562
4459	67.27793	4699.0	4742.8994	-43.8994
4460	67.29224	4594.0	4747.3459	-153.3459
4461	67.30654	4701.0	4764.3032	-63.3032
4462	67.32085	4695.0	4785.8012	-90.8012
4463	67.33516	4680.0	4803.4639	-123.4639
4464	67.34946	4569.0	4814.1142	-245.1142
4465	67.36377	4641.0	4817.9455	-176.9455
4466	67.37808	4703.0	4813.6074	-110.6074
4467	67.39238	4486.0	4799.8108	-313.8108
4468	67.40669	4564.0	4781.0554	-217.0554
4469	67.42100	4687.0	4767.3885	-80.3885
4470	67.43530	4636.0	4768.1729	-132.1729
4471	67.44961	4611.0	4786.9638	-175.9638
4472	67.46391	4749.0	4819.963	-70.963
4473	67.47822	4501.0	4857.2881	-356.2881
4474	67.49253	4589.0	4886.8625	-297.8625
4475	67.50683	4723.0	4903.5429	-180.5429
4476	67.52114	4708.0	4911.2238	-203.2238
4477	67.53545	4678.0	4916.7671	-238.7671
4478	67.54975	4490.0	4922.4801	-432.4801
4479	67.56406	4624.0	4925.2478	-301.2478
4480	67.57837	4615.0	4920.1191	-305.1191
4481	67.59267	4648.0	4905.9857	-257.9857
4482	67.60698	4538.0	4888.4493	-350.4493
4483	67.62128	4636.0	4876.3765	-240.3765
4484	67.63559	4613.0	4875.019	-262.019
4485	67.64990	4621.0	4883.3783	-262.3783
4486	67.66420	4635.0	4894.8245	-259.8245
4487	67.67851	4683.0	4898.8772	-215.8772
4488	67.69282	4612.0	4886.7319	-274.7319
4489	67.70712	4738.0	4857.9053	-119.9053
4490	67.72143	4457.0	4819.9283	-362.9283
4491	67.73574	4539.0	4782.4745	-243.4745
4492	67.75004	4449.0	4751.9229	-302.9229
4493	67.76435	4674.0	4730.6655	-56.6655
4494	67.77866	4574.0	4718.0418	-144.0418
4495	67.79296	4516.0	4713.2026	-197.2026
4496	67.80727	4594.0	4716.37	-122.37
4497	67.82157	4581.0	4727.7537	-146.7537
4498	67.83588	4613.0	4744.5478	-131.5478
4499	67.85019	4611.0	4761.0867	-150.0867
4500	67.86449	4589.0	4770.9679	-181.9679
4501	67.87880	4671.0	4771.0985	-100.0985
4502	67.89311	4525.0	4764.2853	-239.2853
4503	67.90741	4585.0	4755.8727	-170.8727
4504	67.92172	4545.0	4749.6007	-204.6007
4505	67.93603	4617.0	4745.171	-128.171
4506	67.95033	4596.0	4739.7598	-143.7598
4507	67.96464	4568.0	4731.198	-163.198
4508	67.97894	4614.0	4720.1238	-106.1238
4509	67.99325	4614.0	4708.1286	-94.1286
4510	68.00756	4635.0	4694.3881	-59.3881
4511	68.02186	4520.0	4676.1292	-156.1292
4512	68.03617	4641.0	4652.5058	-11.5058
4513	68.05048	4631.0	4626.7744	4.2256
4514	68.06478	4525.0	4603.9105	-78.9105
4515	68.07909	4540.0	4588.8244	-48.8244
4516	68.09340	4498.0	4585.1613	-87.1613
4517	68.10770	4524.0	4594.3227	-70.3227
4518	68.12201	4612.0	4614.7649	-2.7649
4519	68.13632	4531.0	4642.885	-111.885
4520	68.15062	4619.0	4675.5941	-56.5941
4521	68.16493	4462.0	4712.3638	-250.3638
4522	68.17923	4566.0	4754.1502	-188.1502
4523	68.19354	4611.0	4799.2749	-188.2749
4524	68.20785	4539.0	4841.7611	-302.7611
4525	68.22215	4644.0	4872.3062	-228.3062
4526	68.23646	4705.0	4884.4897	-179.4897
4527	68.25077	4745.0	4881.9548	-136.9548
4528	68.26507	4507.0	4878.0053	-371.0053
4529	68.27938	4571.0	4884.3444	-313.3444
4530	68.29369	4749.0	4899.1956	-150.1956
4531	68.30799	4729.0	4906.3315	-177.3315
4532	68.32230	4578.0	4887.9495	-309.9495
4533	68.33660	4733.0	4841.0927	-108.0927
4534	68.35091	4688.0	4780.4425	-92.4425
4535	68.36522	4563.0	4725.0784	-162.0784
4536	68.37952	4771.0	4686.3986	84.6014
4537	68.39383	4575.0	4666.5136	-91.5136
4538	68.40814	4682.0	4661.5411	20.4589
4539	68.42244	4511.0	4664.9891	-153.9891
4540	68.43675	4572.0	4671.5017	-99.5017
4541	68.45106	4624.0	4678.7967	-54.7967
4542	68.46536	4569.0	4686.7624	-117.7624
4543	68.47967	4636.0	4693.6955	-57.6955
4544	68.49398	4502.0	4695.6794	-193.6794
4545	68.50828	4600.0	4688.4801	-88.4801
4546	68.52259	4606.0	4670.7099	-64.7099
4547	68.53689	4597.0	4646.4278	-49.4278
4548	68.55120	4526.0	4623.5484	-97.5484
4549	68.56551	4628.0	4609.451	18.549
4550	68.57981	4633.0	4608.643	24.357
4551	68.59412	4542.0	4624.1472	-82.1472
4552	68.60843	4614.0	4657.0541	-43.0541
4553	68.62273	4582.0	4703.5671	-121.5671
4554	68.63704	4534.0	4751.8965	-217.8965
4555	68.65135	4557.0	4783.6565	-226.6565
4556	68.66565	4544.0	4783.9045	-239.9045
4557	68.67996	4586.0	4753.0104	-167.0104
4558	68.69426	4625.0	4706.1687	-81.1687
4559	68.70857	4604.0	4661.8783	-57.8783
4560	68.72288	4529.0	4631.8242	-102.8242
4561	68.73718	4548.0	4619.9683	-71.9683
4562	68.75149	4627.0	4623.4787	3.5213
4563	68.76580	4530.0	4636.291	-106.291
4564	68.78010	4574.0	4654.1401	-80.1401
4565	68.79441	4586.0	4677.2814	-91.2814
4566	68.80872	4664.0	4707.7836	-43.7836
4567	68.82302	4497.0	4744.2606	-247.2606
4568	68.83733	4592.0	4780.1543	-188.1543
4569	68.85164	4521.0	4805.5963	-284.5963
4570	68.86594	4377.0	4811.0987	-434.0987
4571	68.88025	4519.0	4792.6888	-273.6888
4572	68.89455	4575.0	4755.9994	-180.9994
4573	68.90886	4505.0	4713.9015	-208.9015
4574	68.92317	4468.0	4677.7338	-209.7338
4575	68.93747	4561.0	4650.4469	-89.4469
4576	68.95178	4449.0	4627.6499	-178.6499
4577	68.96609	4517.0	4604.075	-87.075
4578	68.98039	4483.0	4579.0828	-96.0828
4579	68.99470	4421.0	4557.1806	-136.1806
4580	69.00901	4480.0	4543.847	-63.847
4581	69.02331	4357.0	4542.0654	-185.0654
4582	69.03762	4542.0	4552.6157	-10.6157
4583	69.05192	4621.0	4574.4879	46.5121
4584	69.06623	4562.0	4605.7019	-43.7019
4585	69.08054	4702.0	4643.3269	58.6731
4586	69.09484	4870.0	4683.788	186.212
4587	69.10915	4866.0	4720.5593	145.4407
4588	69.12346	4726.0	4742.043	-16.043
4589	69.13776	4857.0	4737.2409	119.7591
4590	69.15207	4834.0	4706.539	127.461
4591	69.16638	4663.0	4662.0421	0.9579
4592	69.18068	4562.0	4618.2398	-56.2398
4593	69.19499	4547.0	4583.4269	-36.4269
4594	69.20930	4583.0	4558.5354	24.4646
4595	69.22360	4554.0	4541.5171	12.4829
4596	69.23791	4509.0	4532.5238	-23.5238
4597	69.25221	4467.0	4534.6108	-67.6108
4598	69.26652	4562.0	4549.854	12.146
4599	69.28083	4627.0	4576.4559	50.5441
4600	69.29513	4642.0	4608.9751	33.0249
4601	69.30944	4588.0	4639.1263	-51.1263
4602	69.32375	4595.0	4658.0829	-63.0829
4603	69.33805	4559.0	4659.5109	-100.5109
4604	69.35236	4653.0	4642.4558	10.5442
4605	69.36667	4586.0	4611.2948	-25.2948
4606	69.38097	4454.0	4572.4109	-118.4109
4607	69.39528	4612.0	4531.2232	80.7768
4608	69.40958	4671.0	4491.3654	179.6346
4609	69.42389	4568.0	4455.2928	112.7072
4610	69.43820	4531.0	4425.8991	105.1009
4611	69.45250	4433.0	4405.7545	27.2455
4612	69.46681	4505.0	4395.5441	109.4559
4613	69.48112	4431.0	4394.1515	36.8485
4614	69.49542	4458.0	4399.3362	58.6638
4615	69.50973	4452.0	4409.14	42.86
4616	69.52404	4353.0	4422.3008	-69.3008
4617	69.53834	4491.0	4437.5896	53.4104
4618	69.55265	4461.0	4453.4753	7.5247
4619	69.56696	4357.0	4468.3349	-111.3349
4620	69.58126	4257.0	4481.5288	-224.5288
4621	69.59557	4358.0	4494.3587	-136.3587
4622	69.60987	4364.0	4509.5822	-145.5822
4623	69.62418	4373.0	4528.8702	-155.8702
4624	69.63849	4446.0	4549.5509	-103.5509
4625	69.65279	4401.0	4564.8705	-163.8705
4626	69.66710	4318.0	4568.9941	-250.9941
4627	69.68141	4376.0	4561.0349	-185.0349
4628	69.69571	4426.0	4543.6032	-117.6032
4629	69.71002	4216.0	4521.0344	-305.0344
4630	69.72433	4520.0	4498.9663	21.0337
4631	69.73863	4353.0	4483.3777	-130.3777
4632	69.75294	4389.0	4478.4656	-89.4656
4633	69.76724	4339.0	4484.7496	-145.7496
4634	69.78155	4377.0	4498.6517	-121.6517
4635	69.79586	4428.0	4514.2109	-86.2109
4636	69.81016	4515.0	4526.8598	-11.8598
4637	69.82447	4379.0	4536.3164	-157.3164
4638	69.83878	4321.0	4545.6046	-224.6046
4639	69.85308	4541.0	4557.0544	-16.0544
4640	69.86739	4356.0	4571.1945	-215.1945
4641	69.88170	4322.0	4586.7795	-264.7795
4642	69.89600	4352.0	4600.2582	-248.2582
4643	69.91031	4321.0	4607.7587	-286.7587
4644	69.92462	4448.0	4608.1617	-160.1617
4645	69.93892	4308.0	4605.4783	-297.4783
4646	69.95323	4352.0	4606.064	-254.064
4647	69.96753	4474.0	4614.1886	-140.1886
4648	69.98184	4332.0	4630.7932	-298.7932
4649	69.99615	4425.0	4655.8785	-230.8785
4650	70.01045	4455.0	4689.4667	-234.4667
4651	70.02476	4326.0	4732.017	-406.017
4652	70.03907	4400.0	4781.5211	-381.5211
4653	70.05337	4359.0	4831.0228	-472.0228
4654	70.06768	4576.0	4870.2548	-294.2548
4655	70.08199	4487.0	4891.392	-404.392
4656	70.09629	4410.0	4894.4431	-484.4431
4657	70.11060	4498.0	4886.9672	-388.9672
4658	70.12490	4560.0	4877.8741	-317.8741
4659	70.13921	4534.0	4870.8014	-336.8014
4660	70.15352	4343.0	4862.2675	-519.2675
4661	70.16782	4495.0	4845.9466	-350.9466
4662	70.18213	4436.0	4821.549	-385.549
4663	70.19644	4475.0	4797.8623	-322.8623
4664	70.21074	4523.0	4786.2347	-263.2347
4665	70.22505	4548.0	4791.6122	-243.6122
4666	70.23936	4499.0	4810.4901	-311.4901
4667	70.25366	4439.0	4834.9883	-395.9883
4668	70.26797	4404.0	4858.2129	-454.2129
4669	70.28228	4418.0	4876.3199	-458.3199
4670	70.29658	4525.0	4886.8599	-361.8599
4671	70.31089	4419.0	4885.5906	-466.5906
4672	70.32519	4256.0	4869.3759	-613.3759
4673	70.33950	4383.0	4838.6439	-455.6439
4674	70.35381	4351.0	4795.7528	-444.7528
4675	70.36811	4416.0	4743.0312	-327.0312
4676	70.38242	4350.0	4684.6931	-334.6931
4677	70.39673	4354.0	4628.4304	-274.4304
4678	70.41103	4258.0	4582.1809	-324.1809
4679	70.42534	4278.0	4550.4589	-272.4589
4680	70.43965	4288.0	4533.7193	-245.7193
4681	70.45395	4348.0	4530.6359	-182.6359
4682	70.46826	4273.0	4540.2636	-267.2636
4683	70.48256	4393.0	4562.3634	-169.3634
4684	70.49687	4327.0	4595.288	-268.288
4685	70.51118	4301.0	4633.9258	-332.9258
4686	70.52548	4366.0	4670.102	-304.102
4687	70.53979	4322.0	4695.161	-373.161
4688	70.55410	4397.0	4704.3121	-307.3121
4689	70.56840	4369.0	4698.0273	-329.0273
4690	70.58271	4274.0	4680.0384	-406.0384
4691	70.59702	4291.0	4656.4026	-365.4026
4692	70.61132	4450.0	4635.195	-185.195
4693	70.62563	4260.0	4624.7058	-364.7058
4694	70.63994	4314.0	4630.4951	-316.4951
4695	70.65424	4323.0	4652.923	-329.923
4696	70.66855	4302.0	4685.048	-383.048
4697	70.68285	4280.0	4713.9386	-433.9386
4698	70.69716	4254.0	4727.6917	-473.6917
4699	70.71147	4377.0	4724.3792	-347.3792
4700	70.72577	4412.0	4711.5736	-299.5736
4701	70.74008	4352.0	4696.5155	-344.5155
4702	70.75439	4373.0	4680.0849	-307.0849
4703	70.76869	4288.0	4659.8379	-371.8379
4704	70.78300	4305.0	4635.3051	-330.3051
4705	70.79731	4328.0	4608.8985	-280.8985
4706	70.81161	4258.0	4583.8401	-325.8401
4707	70.82592	4181.0	4562.9548	-381.9548
4708	70.84022	4215.0	4548.5357	-333.5357
4709	70.85453	4195.0	4543.4246	-348.4246
4710	70.86884	4340.0	4549.1032	-209.1032
4711	70.88314	4246.0	4562.8441	-316.8441
4712	70.89745	4306.0	4579.3451	-273.3451
4713	70.91176	4235.0	4594.7687	-359.7687
4714	70.92606	4162.0	4608.7584	-446.7584
4715	70.94037	4243.0	4621.6847	-378.6847
4716	70.95468	4248.0	4630.4004	-382.4004
4717	70.96898	4339.0	4628.8076	-289.8076
4718	70.98329	4179.0	4613.2187	-434.2187
4719	70.99760	4168.0	4585.8583	-417.8583
4720	71.01190	4264.0	4552.0099	-288.0099
4721	71.02621	4227.0	4516.7728	-289.7728
4722	71.04051	4208.0	4483.8532	-275.8532
4723	71.05482	4188.0	4456.3651	-268.3651
4724	71.06913	4330.0	4437.2997	-107.2997
4725	71.08343	4301.0	4430.3214	-129.3214
4726	71.09774	4270.0	4438.5214	-168.5214
4727	71.11205	4164.0	4462.9756	-298.9756
4728	71.12635	4147.0	4501.6291	-354.6291
4729	71.14066	4192.0	4546.8257	-354.8257
4730	71.15497	4298.0	4585.5789	-287.5789
4731	71.16927	4255.0	4603.5686	-348.5686
4732	71.18358	4296.0	4593.5359	-297.5359
4733	71.19788	4190.0	4559.9767	-369.9767
4734	71.21219	4223.0	4514.3698	-291.3698
4735	71.22650	4326.0	4467.8457	-141.8457
4736	71.24080	4179.0	4427.3367	-248.3367
4737	71.25511	4097.0	4395.7719	-298.7719
4738	71.26942	4353.0	4374.2033	-21.2033
4739	71.28372	4177.0	4363.612	-186.612
4740	71.29803	4213.0	4365.3165	-152.3165
4741	71.31234	4377.0	4379.4012	-2.4012
4742	71.32664	4154.0	4403.5654	-249.5654
4743	71.34095	4121.0	4432.3651	-311.3651
4744	71.35526	4131.0	4458.0332	-327.0332
4745	71.36956	4058.0	4472.4484	-414.4484
4746	71.38387	4197.0	4470.4815	-273.4815
4747	71.39817	4108.0	4452.2269	-344.2269
4748	71.41248	4244.0	4421.7865	-177.7865
4749	71.42679	4213.0	4385.893	-172.893
4750	71.44109	4177.0	4351.5685	-174.5685
4751	71.45540	4199.0	4323.8546	-124.8546
4752	71.46971	4273.0	4305.2709	-32.2709
4753	71.48401	4133.0	4296.8462	-163.8462
4754	71.49832	4196.0	4299.0531	-103.0531
4755	71.51263	4175.0	4311.9618	-136.9618
4756	71.52693	4206.0	4334.7019	-128.7019
4757	71.54124	4200.0	4365.7045	-165.7045
4758	71.55554	4242.0	4402.0997	-160.0997
4759	71.56985	4269.0	4440.4143	-171.4143
4760	71.58416	4176.0	4477.6116	-301.6116
4761	71.59846	4176.0	4512.8726	-336.8726
4762	71.61277	4202.0	4546.9507	-344.9507
4763	71.62708	4183.0	4578.8133	-395.8133
4764	71.64138	4153.0	4602.8107	-449.8107
4765	71.65569	4210.0	4613.1239	-403.1239
4766	71.67000	4161.0	4609.3283	-448.3283
4767	71.68430	4133.0	4596.399	-463.399
4768	71.69861	4119.0	4579.5907	-460.5907
4769	71.71292	4135.0	4561.784	-426.784
4770	71.72722	4180.0	4546.9246	-366.9246
4771	71.74153	4232.0	4541.1083	-309.1083
4772	71.75583	4196.0	4549.2606	-353.2606
4773	71.77014	4159.0	4571.7006	-412.7006
4774	71.78445	4109.0	4604.5884	-495.5884
4775	71.79875	4263.0	4642.3016	-379.3016
4776	71.81306	4229.0	4679.98	-450.98
4777	71.82737	4197.0	4712.9828	-515.9828
4778	71.84167	4191.0	4735.6836	-544.6836
4779	71.85598	4227.0	4741.5142	-514.5142
4780	71.87029	4222.0	4727.1341	-505.1341
4781	71.88459	4192.0	4694.9717	-502.9717
4782	71.89890	4178.0	4651.2123	-473.2123
4783	71.91320	4105.0	4602.9123	-497.9123
4784	71.92751	4146.0	4555.5889	-409.5889
4785	71.94182	4219.0	4511.9516	-292.9516
4786	71.95612	4055.0	4473.5153	-418.5153
4787	71.97043	4244.0	4441.7973	-197.7973
4788	71.98474	4251.0	4418.2313	-167.2313
4789	71.99904	4130.0	4403.0835	-273.0835
4790	72.01335	4192.0	4394.7479	-202.7479
4791	72.02766	4252.0	4390.4924	-138.4924
4792	72.04196	4249.0	4387.1256	-138.1256
4793	72.05627	4429.0	4381.8772	47.1228
4794	72.07058	4309.0	4373.5628	-64.5628
4795	72.08488	4316.0	4362.728	-46.728
4796	72.09919	4312.0	4351.2442	-39.2442
4797	72.11349	4388.0	4340.9282	47.0718
4798	72.12780	4364.0	4333.0905	30.9095
4799	72.14211	4293.0	4328.0499	-35.0499
4800	72.15641	4288.0	4324.9233	-36.9233
4801	72.17072	4358.0	4322.2281	35.7719
4802	72.18503	4273.0	4318.3508	-45.3508
4803	72.19933	4058.0	4311.9461	-253.9461
4804	72.21364	4106.0	4303.8679	-197.8679
4805	72.22795	4099.0	4297.1844	-198.1844
4806	72.24225	4303.0	4295.0315	7.9685
4807	72.25656	4155.0	4298.3439	-143.3439
4808	72.27086	4118.0	4306.3092	-188.3092
4809	72.28517	4196.0	4317.5928	-121.5928
4810	72.29948	4203.0	4331.6792	-128.6792
4811	72.31378	4191.0	4347.1108	-156.1108
4812	72.32809	4232.0	4361.1524	-129.1524
4813	72.34240	4113.0	4372.1188	-259.1188
4814	72.35670	4212.0	4380.1131	-168.1131
4815	72.37101	4164.0	4384.8808	-220.8808
4816	72.38532	4163.0	4384.174	-221.174
4817	72.39962	4195.0	4376.7793	-181.7793
4818	72.41393	4193.0	4365.9585	-172.9585
4819	72.42824	4094.0	4358.0701	-264.0701
4820	72.44254	4097.0	4358.7475	-261.7475
4821	72.45685	4248.0	4370.2005	-122.2005
4822	72.47115	4132.0	4389.9775	-257.9775
4823	72.48546	4180.0	4411.4666	-231.4666
4824	72.49977	4160.0	4426.4852	-266.4852
4825	72.51407	4173.0	4429.8902	-256.8902
4826	72.52838	4207.0	4422.5893	-215.5893
4827	72.54269	4141.0	4410.253	-269.253
4828	72.55699	4241.0	4399.4276	-158.4276
4829	72.57130	4123.0	4393.9446	-270.9446
4830	72.58561	4241.0	4393.5406	-152.5406
4831	72.59991	4220.0	4394.4274	-174.4274
4832	72.61422	4126.0	4391.8251	-265.8251
4833	72.62852	4213.0	4384.1277	-171.1277
4834	72.64283	4130.0	4373.8612	-243.8612
4835	72.65714	4156.0	4364.7936	-208.7936
4836	72.67144	4212.0	4358.8489	-146.8489
4837	72.68575	4242.0	4355.6514	-113.6514
4838	72.70006	4145.0	4354.4001	-209.4001
4839	72.71436	4037.0	4354.2895	-317.2895
4840	72.72867	4114.0	4356.0697	-242.0697
4841	72.74298	4169.0	4362.0531	-193.0531
4842	72.75728	4148.0	4374.6062	-226.6062
4843	72.77159	4141.0	4393.8221	-252.8221
4844	72.78590	4261.0	4415.5297	-154.5297
4845	72.80020	4128.0	4432.1617	-304.1617
4846	72.81451	4244.0	4437.3258	-193.3258
4847	72.82881	4214.0	4430.9435	-216.9435
4848	72.84312	4233.0	4419.1586	-186.1586
4849	72.85743	4349.0	4408.9452	-59.9452
4850	72.87173	4131.0	4404.5639	-273.5639
4851	72.88604	4193.0	4405.8793	-212.8793
4852	72.90035	4204.0	4410.4798	-206.4798
4853	72.91465	4271.0	4415.6236	-144.6236
4854	72.92896	4232.0	4419.5857	-187.5857
4855	72.94327	4197.0	4421.9695	-224.9695
4856	72.95757	4181.0	4423.4854	-242.4854
4857	72.97188	4250.0	4425.3721	-175.3721
4858	72.98618	4290.0	4428.4268	-138.4268
4859	73.00049	4279.0	4432.0094	-153.0094
4860	73.01480	4200.0	4435.2422	-235.2422
4861	73.02910	4218.0	4438.804	-220.804
4862	73.04341	4288.0	4445.478	-157.478
4863	73.05772	4184.0	4457.4748	-273.4748
4864	73.07202	4175.0	4472.4367	-297.4367
4865	73.08633	4229.0	4483.0385	-254.0385
4866	73.10064	4185.0	4482.4479	-297.4479
4867	73.11494	4190.0	4470.1831	-280.1831
4868	73.12925	4203.0	4452.0118	-249.0118
4869	73.14356	4143.0	4435.4062	-292.4062
4870	73.15786	4263.0	4425.8083	-162.8083
4871	73.17217	4047.0	4426.1774	-379.1774
4872	73.18647	4174.0	4437.2537	-263.2537
4873	73.20078	4130.0	4457.045	-327.045
4874	73.21509	4223.0	4480.4939	-257.4939
4875	73.22939	4251.0	4500.7849	-249.7849
4876	73.24370	4175.0	4512.8396	-337.8396
4877	73.25801	4242.0	4516.5327	-274.5327
4878	73.27231	4227.0	4515.4787	-288.4787
4879	73.28662	4129.0	4512.4904	-383.4904
4880	73.30093	4200.0	4506.5935	-306.5935
4881	73.31523	4365.0	4495.8948	-130.8948
4882	73.32954	4162.0	4482.8509	-320.8509
4883	73.34384	4223.0	4474.0899	-251.0899
4884	73.35815	4200.0	4475.5066	-275.5066
4885	73.37246	4282.0	4487.5678	-205.5678
4886	73.38676	4220.0	4504.4267	-284.4267
4887	73.40107	4260.0	4517.1063	-257.1063
4888	73.41538	4287.0	4519.5527	-232.5527
4889	73.42968	4273.0	4513.0057	-240.0057
4890	73.44399	4207.0	4503.3705	-296.3705
4891	73.45830	4244.0	4496.3568	-252.3568
4892	73.47260	4324.0	4495.1213	-171.1213
4893	73.48691	4219.0	4500.1493	-281.1493
4894	73.50122	4221.0	4509.1079	-288.1079
4895	73.51552	4215.0	4517.8543	-302.8543
4896	73.52983	4258.0	4523.7119	-265.7119
4897	73.54413	4244.0	4528.1875	-284.1875
4898	73.55844	4394.0	4535.4691	-141.4691
4899	73.57275	4211.0	4547.3538	-336.3538
4900	73.58705	4177.0	4560.9781	-383.9781
4901	73.60136	4313.0	4570.5199	-257.5199
4902	73.61567	4213.0	4569.8436	-356.8436
4903	73.62997	4153.0	4555.8808	-402.8808
4904	73.64428	4193.0	4531.4742	-338.4742
4905	73.65859	4221.0	4503.5625	-282.5625
4906	73.67289	4107.0	4479.0772	-372.0772
4907	73.68720	4202.0	4461.4109	-259.4109
4908	73.70150	4120.0	4448.7871	-328.7871
4909	73.71581	4162.0	4435.5703	-273.5703
4910	73.73012	4161.0	4417.4319	-256.4319
4911	73.74442	4198.0	4395.3198	-197.3198
4912	73.75873	4210.0	4374.2496	-164.2496
4913	73.77304	4246.0	4359.5959	-113.5959
4914	73.78734	4195.0	4354.0279	-159.0279
4915	73.80165	4188.0	4357.4368	-169.4368
4916	73.81596	4263.0	4367.9875	-104.9875
4917	73.83026	4198.0	4382.5654	-184.5654
4918	73.84457	4191.0	4397.5917	-206.5917
4919	73.85888	4073.0	4409.1889	-336.1889
4920	73.87318	4259.0	4413.0417	-154.0417
4921	73.88749	4322.0	4405.3747	-83.3747
4922	73.90179	4135.0	4385.2692	-250.2692
4923	73.91610	4135.0	4356.5107	-221.5107
4924	73.93041	4147.0	4324.6186	-177.6186
4925	73.94471	4152.0	4293.68	-141.68
4926	73.95902	4238.0	4266.4572	-28.4572
4927	73.97333	4240.0	4245.4746	-5.4746
4928	73.98763	4153.0	4232.994	-79.994
4929	74.00194	4150.0	4229.8463	-79.8463
4930	74.01625	4213.0	4235.1192	-22.1192
4931	74.03055	4086.0	4246.5601	-160.5601
4932	74.04486	4191.0	4262.155	-71.155
4933	74.05916	4182.0	4281.3661	-99.3661
4934	74.07347	4298.0	4304.3345	-6.3345
4935	74.08778	4313.0	4330.0733	-17.0733
4936	74.10208	4145.0	4354.6701	-209.6701
4937	74.11639	4222.0	4372.1279	-150.1279
4938	74.13070	4152.0	4377.4639	-225.4639
4939	74.14500	4257.0	4369.4054	-112.4054
4940	74.15931	4056.0	4350.0926	-294.0926
4941	74.17362	4225.0	4323.2825	-98.2825
4942	74.18792	4051.0	4293.0453	-242.0453
4943	74.20223	4110.0	4263.4907	-153.4907
4944	74.21654	4135.0	4238.0884	-103.0884
4945	74.23084	4084.0	4219.3148	-135.3148
4946	74.24515	4178.0	4207.9154	-29.9154
4947	74.25945	4191.0	4203.0824	-12.0824
4948	74.27376	4141.0	4202.5991	-61.5991
4949	74.28807	4173.0	4203.4906	-30.4906
4950	74.30237	4223.0	4203.5053	19.4947
4951	74.31668	4083.0	4202.121	-119.121
4952	74.33099	4364.0	4199.9878	164.0122
4953	74.34529	4221.0	4197.3425	23.6575
4954	74.35960	4146.0	4193.5627	-47.5627
4955	74.37391	4187.0	4188.6801	-1.6801
4956	74.38821	4252.0	4183.2466	68.7534
4957	74.40252	4189.0	4178.053	10.947
4958	74.41682	4170.0	4173.821	-3.821
4959	74.43113	4184.0	4171.543	12.457
4960	74.44544	4251.0	4172.1044	78.8956
4961	74.45974	4264.0	4176.0872	87.9128
4962	74.47405	4296.0	4183.1107	112.8893
4963	74.48836	4208.0	4191.7049	16.2951
4964	74.50266	4194.0	4200.2176	-6.2176
4965	74.51697	4097.0	4208.2851	-111.2851
4966	74.53128	4263.0	4217.0187	45.9813
4967	74.54558	4178.0	4227.0908	-49.0908
4968	74.55989	4114.0	4236.3116	-122.3116
4969	74.57420	4226.0	4239.4635	-13.4635
4970	74.58850	4191.0	4233.0841	-42.0841
4971	74.60281	4195.0	4218.6311	-23.6311
4972	74.61711	4331.0	4200.7617	130.2383
4973	74.63142	4139.0	4183.3013	-44.3013
4974	74.64573	4148.0	4167.5876	-19.5876
4975	74.66003	4297.0	4153.8368	143.1632
4976	74.67434	4213.0	4142.6616	70.3384
4977	74.68865	4265.0	4135.2273	129.7727
4978	74.70295	4157.0	4132.1787	24.8213
4979	74.71726	4123.0	4133.8093	-10.8093
4980	74.73157	4100.0	4140.4038	-40.4038
4981	74.74587	4145.0	4152.5057	-7.5057
4982	74.76018	4146.0	4170.204	-24.204
4983	74.77448	4213.0	4191.3631	21.6369
4984	74.78879	4114.0	4211.8553	-97.8553
4985	74.80310	4183.0	4227.5022	-44.5022
4986	74.81740	4232.0	4238.0159	-6.0159
4987	74.83171	4127.0	4247.5465	-120.5465
4988	74.84602	4145.0	4261.6621	-116.6621
4989	74.86032	4262.0	4283.5398	-21.5398
4990	74.87463	4298.0	4312.6607	-14.6607
4991	74.88894	4307.0	4345.3673	-38.3673
4992	74.90324	4270.0	4374.4488	-104.4488
4993	74.91755	4166.0	4390.3542	-224.3542
4994	74.93186	4207.0	4386.0531	-179.0531
4995	74.94616	4106.0	4362.7983	-256.7983
4996	74.96047	4175.0	4329.8866	-154.8866
4997	74.97477	4097.0	4298.9492	-201.9492
4998	74.98908	4242.0	4278.4339	-36.4339
4999	75.00339	4298.0	4271.8474	26.1526
5000	75.01769	4331.0	4279.2571	51.7429
5001	75.03200	4302.0	4299.7936	2.2064
5002	75.04631	4233.0	4332.8741	-99.8741
5003	75.06061	4416.0	4377.9605	38.0395
5004	75.07492	4256.0	4433.24	-177.24
5005	75.08923	4194.0	4494.2353	-300.2353
5006	75.10353	4395.0	4553.1013	-158.1013
5007	75.11784	4224.0	4599.5864	-375.5864
5008	75.13214	4373.0	4624.1205	-251.1205
5009	75.14645	4482.0	4621.9949	-139.9949
5010	75.16076	4379.0	4595.3704	-216.3704
5011	75.17506	4438.0	4551.623	-113.623
5012	75.18937	4315.0	4499.1687	-184.1687
5013	75.20368	4301.0	4445.9047	-144.9047
5014	75.21798	4281.0	4398.7635	-117.7635
5015	75.23229	4293.0	4362.6601	-69.6601
5016	75.24660	4322.0	4339.6024	-17.6024
5017	75.26090	4286.0	4328.4183	-42.4183
5018	75.27521	4185.0	4326.3355	-141.3355
5019	75.28952	4254.0	4329.0944	-75.0944
5020	75.30382	4212.0	4332.2965	-120.2965
5021	75.31813	4290.0	4332.9953	-42.9953
5022	75.33243	4294.0	4329.9895	-35.9895
5023	75.34674	4300.0	4322.8228	-22.8228
5024	75.36105	4170.0	4311.2918	-141.2918
5025	75.37535	4246.0	4296.6262	-50.6262
5026	75.38966	4246.0	4281.3524	-35.3524
5027	75.40397	4314.0	4267.9376	46.0624
5028	75.41827	4106.0	4257.4747	-151.4747
5029	75.43258	4227.0	4249.75	-22.75
5030	75.44689	4229.0	4243.2271	-14.2271
5031	75.46119	4307.0	4235.1974	71.8026
5032	75.47550	4242.0	4224.3336	17.6664
5033	75.48980	4138.0	4211.1276	-73.1276
5034	75.50411	4309.0	4197.4149	111.5851
5035	75.51842	4224.0	4184.4538	39.5462
5036	75.53272	4291.0	4172.15	118.85
5037	75.54703	4103.0	4161.0237	-58.0237
5038	75.56134	4313.0	4151.9308	161.0692
5039	75.57564	4312.0	4146.6672	165.3328
5040	75.58995	4300.0	4147.1412	152.8588
5041	75.60426	4236.0	4154.5369	81.4631
5042	75.61856	4181.0	4168.0136	12.9864
5043	75.63287	4201.0	4183.4002	17.5998
5044	75.64718	4275.0	4195.2142	79.7858
5045	75.66148	4274.0	4199.9571	74.0429
5046	75.67579	4372.0	4198.7369	173.2631
5047	75.69009	4211.0	4195.9097	15.0903
5048	75.70440	4211.0	4195.6897	15.3103
5049	75.71871	4260.0	4200.32	59.68
5050	75.73301	4229.0	4209.5105	19.4895
5051	75.74732	4246.0	4220.4337	25.5663
5052	75.76163	4291.0	4229.2697	61.7303
5053	75.77593	4351.0	4233.0682	117.9318
5054	75.79024	4274.0	4231.9246	42.0754
5055	75.80455	4324.0	4229.4163	94.5837
5056	75.81885	4331.0	4231.2274	99.7726
5057	75.83316	4206.0	4241.6284	-35.6284
5058	75.84746	4246.0	4261.2462	-15.2462
5059	75.86177	4191.0	4287.1995	-96.1995
5060	75.87608	4257.0	4314.2171	-57.2171
5061	75.89038	4181.0	4335.6944	-154.6944
5062	75.90469	4273.0	4346.3349	-73.3349
5063	75.91900	4391.0	4345.4969	45.5031
5064	75.93330	4223.0	4338.3861	-115.3861
5065	75.94761	4358.0	4332.4687	25.5313
5066	75.96192	4182.0	4332.852	-150.852
5067	75.97622	4166.0	4340.6334	-174.6334
5068	75.99053	4285.0	4354.0717	-69.0717
5069	76.00484	4253.0	4370.2888	-117.2888
5070	76.01914	4239.0	4387.1472	-148.1472
5071	76.03345	4429.0	4404.4258	24.5742
5072	76.04775	4279.0	4421.0835	-142.0835
5073	76.06206	4265.0	4433.4823	-168.4823
5074	76.07637	4376.0	4437.996	-61.996
5075	76.09067	4365.0	4435.5983	-70.5983
5076	76.10498	4341.0	4432.5756	-91.5756
5077	76.11929	4298.0	4435.4749	-137.4749
5078	76.13359	4236.0	4447.1009	-211.1009
5079	76.14790	4136.0	4466.1303	-330.1303
5080	76.16221	4321.0	4487.1116	-166.1116
5081	76.17651	4225.0	4500.4622	-275.4622
5082	76.19082	4117.0	4496.4136	-379.4136
5083	76.20512	4344.0	4472.2719	-128.2719
5084	76.21943	4299.0	4434.7318	-135.7318
5085	76.23374	4266.0	4395.3471	-129.3471
5086	76.24804	4171.0	4363.3136	-192.3136
5087	76.26235	4281.0	4341.5679	-60.5679
5088	76.27666	4114.0	4327.6693	-213.6693
5089	76.29096	4275.0	4315.8424	-40.8424
5090	76.30527	4309.0	4301.7484	7.2516
5091	76.31958	4137.0	4285.9751	-148.9751
5092	76.33388	4192.0	4273.8794	-81.8794
5093	76.34819	4263.0	4271.5075	-8.5075
5094	76.36250	4227.0	4281.1852	-54.1852
5095	76.37680	4098.0	4299.6414	-201.6414
5096	76.39111	4263.0	4318.5556	-55.5556
5097	76.40541	4133.0	4328.4105	-195.4105
5098	76.41972	4137.0	4322.9801	-185.9801
5099	76.43403	4238.0	4301.9444	-63.9444
5100	76.44833	4237.0	4270.3229	-33.3229
5101	76.46264	4119.0	4236.0773	-117.0773
5102	76.47695	4042.0	4206.8613	-164.8613
5103	76.49125	4258.0	4187.5004	70.4996
5104	76.50556	4089.0	4179.2127	-90.2127
5105	76.51987	4255.0	4180.2651	74.7349
5106	76.53417	4080.0	4187.0757	-107.0757
5107	76.54848	4141.0	4195.4303	-54.4303
5108	76.56278	4159.0	4201.3533	-42.3533
5109	76.57709	4127.0	4202.0806	-75.0806
5110	76.59140	4209.0	4196.5333	12.4667
5111	76.60570	4314.0	4184.9906	129.0094
5112	76.62001	4177.0	4168.8728	8.1272
5113	76.63432	4139.0	4150.6726	-11.6726
5114	76.64862	4113.0	4133.3601	-20.3601
5115	76.66293	4187.0	4119.4529	67.5471
5116	76.67724	4189.0	4110.679	78.321
5117	76.69154	4244.0	4108.5362	135.4638
5118	76.70585	4169.0	4114.9009	54.0991
5119	76.72016	4143.0	4131.6476	11.3524
5120	76.73446	4189.0	4160.2948	28.7052
5121	76.74877	4205.0	4201.5392	3.4608
5122	76.76307	4281.0	4255.2305	25.7695
5123	76.77738	4208.0	4319.9219	-111.9219
5124	76.79169	4224.0	4392.3441	-168.3441
5125	76.80599	4198.0	4467.7685	-269.7685
5126	76.82030	4246.0	4540.1727	-294.1727
5127	76.83461	4246.0	4602.3521	-356.3521
5128	76.84891	4314.0	4646.2555	-332.2555
5129	76.86322	4263.0	4664.4545	-401.4545
5130	76.87753	4224.0	4653.5986	-429.5986
5131	76.89183	4154.0	4617.5873	-463.5873
5132	76.90614	4276.0	4566.8781	-290.8781
5133	76.92044	4303.0	4514.0968	-211.0968
5134	76.93475	4246.0	4469.5957	-223.5957
5135	76.94906	4342.0	4437.4969	-95.4969
5136	76.96336	4274.0	4416.8036	-142.8036
5137	76.97767	4272.0	4405.4302	-133.4302
5138	76.99198	4309.0	4403.6289	-94.6289
5139	77.00628	4207.0	4413.3094	-206.3094
5140	77.02059	4263.0	4434.7821	-171.7821
5141	77.03490	4278.0	4465.2689	-187.2689
5142	77.04920	4267.0	4500.0575	-233.0575
5143	77.06351	4317.0	4533.0298	-216.0298
5144	77.07782	4217.0	4556.6132	-339.6132
5145	77.09212	4183.0	4563.2196	-380.2196
5146	77.10643	4198.0	4548.4004	-350.4004
5147	77.12073	4228.0	4513.8379	-285.8379
5148	77.13504	4243.0	4466.9853	-223.9853
5149	77.14935	4202.0	4417.8694	-215.8694
5150	77.16365	4226.0	4374.6503	-148.6503
5151	77.17796	4364.0	4340.3017	23.6983
5152	77.19227	4263.0	4313.0486	-50.0486
5153	77.20657	4286.0	4289.9892	-3.9892
5154	77.22088	4282.0	4270.661	11.339
5155	77.23519	4232.0	4258.1296	-26.1296
5156	77.24949	4340.0	4255.9288	84.0712
5157	77.26380	4228.0	4266.0179	-38.0179
5158	77.27810	4230.0	4288.4996	-58.4996
5159	77.29241	4172.0	4321.0785	-149.0785
5160	77.30672	4282.0	4358.2209	-76.2209
5161	77.32102	4177.0	4390.9805	-213.9805
5162	77.33533	4158.0	4409.5805	-251.5805
5163	77.34964	4225.0	4407.0546	-182.0546
5164	77.36394	4191.0	4382.2565	-191.2565
5165	77.37825	4122.0	4340.9996	-218.9996
5166	77.39256	4294.0	4293.3114	0.6886
5167	77.40686	4098.0	4248.4719	-150.4719
5168	77.42117	4154.0	4212.2455	-58.2455
5169	77.43548	4287.0	4186.9746	100.0254
5170	77.44978	4080.0	4173.6088	-93.6088
5171	77.46409	4158.0	4173.0348	-15.0348
5172	77.47839	4283.0	4186.3115	96.6885
5173	77.49270	4210.0	4214.39	-4.39
5174	77.50701	4200.0	4257.4615	-57.4615
5175	77.52131	4181.0	4313.8446	-132.8446
5176	77.53562	4199.0	4378.6644	-179.6644
5177	77.54993	4280.0	4442.9326	-162.9326
5178	77.56423	4319.0	4495.1187	-176.1187
5179	77.57854	4220.0	4526.6013	-306.6013
5180	77.59285	4231.0	4536.3583	-305.3583
5181	77.60715	4241.0	4528.466	-287.466
5182	77.62146	4217.0	4506.0188	-289.0188
5183	77.63576	4170.0	4468.9826	-298.9826
5184	77.65007	4204.0	4419.1488	-215.1488
5185	77.66438	4218.0	4363.9049	-145.9049
5186	77.67868	4132.0	4312.9457	-180.9457
5187	77.69299	4321.0	4273.5013	47.4987
5188	77.70730	4213.0	4249.219	-36.219
5189	77.72160	4180.0	4240.5179	-60.5179
5190	77.73591	4200.0	4245.3193	-45.3193
5191	77.75022	4130.0	4261.289	-131.289
5192	77.76452	4147.0	4286.9585	-139.9585
5193	77.77883	4159.0	4320.7087	-161.7087
5194	77.79314	4231.0	4359.3172	-128.3172
5195	77.80744	4192.0	4397.6877	-205.6877
5196	77.82175	4279.0	4430.7658	-151.7658
5197	77.83605	4210.0	4455.955	-245.955
5198	77.85036	4262.0	4472.4569	-210.4569
5199	77.86467	4141.0	4479.3264	-338.3264
5200	77.87897	4214.0	4476.1581	-262.1581
5201	77.89328	4231.0	4465.0203	-234.0203
5202	77.90759	4242.0	4449.1381	-207.1381
5203	77.92189	4143.0	4431.1763	-288.1763
5204	77.93620	4222.0	4411.307	-189.307
5205	77.95051	4212.0	4386.4165	-174.4165
5206	77.96481	4353.0	4352.5364	0.4636
5207	77.97912	4256.0	4309.8314	-53.8314
5208	77.99342	4202.0	4264.6313	-62.6313
5209	78.00773	4336.0	4225.6514	110.3486
5210	78.02204	4260.0	4198.7113	61.2887
5211	78.03634	4321.0	4184.5884	136.4116
5212	78.05065	4280.0	4180.6772	99.3228
5213	78.06496	4123.0	4184.0739	-61.0739
5214	78.07926	4171.0	4192.9255	-21.9255
5215	78.09357	4125.0	4205.8579	-80.8579
5216	78.10788	4213.0	4220.2759	-7.2759
5217	78.12218	4343.0	4232.1624	110.8376
5218	78.13649	4202.0	4237.2025	-35.2025
5219	78.15080	4211.0	4233.8571	-22.8571
5220	78.16510	4205.0	4224.7494	-19.7494
5221	78.17941	4158.0	4213.9291	-55.9291
5222	78.19371	4141.0	4204.0265	-63.0265
5223	78.20802	4167.0	4196.3419	-29.3419
5224	78.22233	4193.0	4192.5285	0.4715
5225	78.23663	4133.0	4194.2632	-61.2632
5226	78.25094	4177.0	4201.8572	-24.8572
5227	78.26525	4223.0	4212.7124	10.2876
5228	78.27955	4126.0	4220.7559	-94.7559
5229	78.29386	4208.0	4220.129	-12.129
5230	78.30817	4144.0	4210.82	-66.82
5231	78.32247	4098.0	4198.5269	-100.5269
5232	78.33678	4193.0	4190.0163	2.9837
5233	78.35108	4145.0	4188.2064	-43.2064
5234	78.36539	4225.0	4191.1627	33.8373
5235	78.37970	4240.0	4195.2134	44.7866
5236	78.39400	4373.0	4198.8035	174.1965
5237	78.40831	4270.0	4203.4855	66.5145
5238	78.42262	4223.0	4210.9718	12.0282
5239	78.43692	4252.0	4219.2655	32.7345
5240	78.45123	4245.0	4223.6746	21.3254
5241	78.46554	4145.0	4221.2791	-76.2791
5242	78.47984	4151.0	4214.0008	-63.0008
5243	78.49415	4243.0	4205.6778	37.3222
5244	78.50846	4033.0	4197.6802	-164.6802
5245	78.52276	4138.0	4188.3939	-50.3939
5246	78.53707	4137.0	4176.3201	-39.3201
5247	78.55137	4171.0	4162.1366	8.8634
5248	78.56568	4138.0	4147.8155	-9.8155
5249	78.57999	4219.0	4134.426	84.574
5250	78.59429	4248.0	4122.3158	125.6842
5251	78.60860	4237.0	4111.7229	125.2771
5252	78.62291	4311.0	4103.3909	207.6091
5253	78.63721	4230.0	4098.1075	131.8925
5254	78.65152	4339.0	4096.0592	242.9408
5255	78.66583	4145.0	4095.7632	49.2368
5256	78.68013	4124.0	4095.0099	28.9901
5257	78.69444	4210.0	4093.2693	116.7307
5258	78.70874	4123.0	4092.3985	30.6015
5259	78.72305	4141.0	4095.7298	45.2702
5260	78.73736	4226.0	4104.4531	121.5469
5261	78.75166	4185.0	4116.2169	68.7831
5262	78.76597	4119.0	4125.8335	-6.8335
5263	78.78028	4090.0	4127.7549	-37.7549
5264	78.79458	4255.0	4118.3796	136.6204
5265	78.80889	4194.0	4097.4907	96.5093
5266	78.82320	4207.0	4068.304	138.696
5267	78.83750	4202.0	4036.3145	165.6855
5268	78.85181	4175.0	4006.9839	168.0161
5269	78.86612	4267.0	3983.2225	283.7775
5270	78.88042	4195.0	3965.5863	229.4137
5271	78.89473	4233.0	3953.5891	279.4109
5272	78.90903	4239.0	3947.1157	291.8843
5273	78.92334	4215.0	3946.6423	268.3577
5274	78.93765	4193.0	3952.6157	240.3843
5275	78.95195	4285.0	3964.8235	320.1765
5276	78.96626	4102.0	3981.4447	120.5553
5277	78.98057	4139.0	3999.0139	139.9861
5278	78.99487	4239.0	4014.3447	224.6553
5279	79.00918	4310.0	4024.9601	285.0399
5280	79.02349	4180.0	4029.3644	150.6356
5281	79.03779	4164.0	4025.581	138.419
5282	79.05210	4119.0	4012.3369	106.6631
5283	79.06640	4268.0	3990.4219	277.5781
5284	79.08071	4215.0	3963.829	251.171
5285	79.09502	4222.0	3938.125	283.875
5286	79.10932	4096.0	3917.3126	178.6874
5287	79.12363	4208.0	3903.0858	304.9142
5288	79.13794	4268.0	3895.5462	372.4538
5289	79.15224	4272.0	3894.0204	377.9796
5290	79.16655	4115.0	3897.2854	217.7146
5291	79.18086	4157.0	3902.6578	254.3422
5292	79.19516	4248.0	3906.8941	341.1059
5293	79.20947	4245.0	3907.5683	337.4317
5294	79.22378	4315.0	3904.5493	410.4507
5295	79.23808	4324.0	3899.9589	424.0411
5296	79.25239	4224.0	3896.6522	327.3478
5297	79.26669	4088.0	3896.2288	191.7712
5298	79.28100	4194.0	3898.5531	295.4469
5299	79.29531	4283.0	3902.7355	380.2645
5300	79.30961	4204.0	3908.3964	295.6036
5301	79.32392	4150.0	3916.6831	233.3169
5302	79.33823	4079.0	3929.9861	149.0139
5303	79.35253	4326.0	3950.1168	375.8832
5304	79.36684	4285.0	3977.1494	307.8506
5305	79.38115	4141.0	4008.8568	132.1432
5306	79.39545	4220.0	4040.6764	179.3236
5307	79.40976	4186.0	4066.8575	119.1425
5308	79.42406	4197.0	4082.2683	114.7317
5309	79.43837	4230.0	4084.952	145.048
5310	79.45268	4316.0	4077.4104	238.5896
5311	79.46698	4329.0	4065.4263	263.5737
5312	79.48129	4264.0	4054.5912	209.4088
5313	79.49560	4173.0	4048.2287	124.7713
5314	79.50990	4237.0	4047.459	189.541
5315	79.52421	4232.0	4053.1025	178.8975
5316	79.53852	4176.0	4065.9395	110.0605
5317	79.55282	4311.0	4085.286	225.714
5318	79.56713	4274.0	4107.8437	166.1563
5319	79.58144	4274.0	4128.2033	145.7967
5320	79.59574	4375.0	4141.3897	233.6103
5321	79.61005	4180.0	4145.8247	34.1753
5322	79.62435	4316.0	4144.3682	171.6318
5323	79.63866	4216.0	4142.1046	73.8954
5324	79.65297	4296.0	4143.3154	152.6846
5325	79.66727	4392.0	4150.6104	241.3896
5326	79.68158	4403.0	4165.3699	237.6301
5327	79.69589	4378.0	4188.3061	189.6939
5328	79.71019	4219.0	4219.7384	-0.7384
5329	79.72450	4300.0	4259.1836	40.8164
5330	79.73881	4319.0	4305.178	13.822
5331	79.75311	4322.0	4355.0464	-33.0464
5332	79.76742	4305.0	4402.6831	-97.6831
5333	79.78172	4380.0	4438.3092	-58.3092
5334	79.79603	4382.0	4452.9154	-70.9154
5335	79.81034	4330.0	4445.4398	-115.4398
5336	79.82464	4408.0	4422.8938	-14.8938
5337	79.83895	4351.0	4394.5714	-43.5714
5338	79.85326	4376.0	4365.7598	10.2402
5339	79.86756	4227.0	4337.7644	-110.7644
5340	79.88187	4266.0	4310.713	-44.713
5341	79.89618	4266.0	4286.2924	-20.2924
5342	79.91048	4321.0	4268.1491	52.8509
5343	79.92479	4321.0	4258.4225	62.5775
5344	79.93910	4387.0	4255.7159	131.2841
5345	79.95340	4294.0	4256.6752	37.3248
5346	79.96771	4320.0	4258.5445	61.4555
5347	79.98201	4406.0	4259.9755	146.0245
5348	79.99632	4281.0	4260.2311	20.7689
5349	80.01063	4395.0	4257.6084	137.3916
5350	80.02493	4420.0	4249.3747	170.6253
5351	80.03924	4380.0	4233.5404	146.4596
5352	80.05355	4234.0	4212.0426	21.9574
5353	80.06785	4423.0	4190.3291	232.6709
5354	80.08216	4349.0	4174.4318	174.5682
5355	80.09647	4211.0	4168.2209	42.7791
5356	80.11077	4278.0	4172.57	105.43
5357	80.12508	4332.0	4186.6613	145.3387
5358	80.13938	4300.0	4209.3266	90.6734
5359	80.15369	4361.0	4239.2103	121.7897
5360	80.16800	4317.0	4273.1407	43.8593
5361	80.18230	4340.0	4305.9077	34.0923
5362	80.19661	4283.0	4331.087	-48.087
5363	80.21092	4199.0	4343.2965	-144.2965
5364	80.22522	4383.0	4339.9746	43.0254
5365	80.23953	4241.0	4321.6082	-80.6082
5366	80.25384	4276.0	4290.9743	-14.9743
5367	80.26814	4315.0	4253.2628	61.7372
5368	80.28245	4278.0	4215.1904	62.8096
5369	80.29676	4314.0	4183.0877	130.9123
5370	80.31106	4305.0	4161.3087	143.6913
5371	80.32537	4269.0	4151.7516	117.2484
5372	80.33967	4379.0	4154.0377	224.9623
5373	80.35398	4257.0	4165.8732	91.1268
5374	80.36829	4287.0	4184.157	102.843
5375	80.38259	4340.0	4206.1356	133.8644
5376	80.39690	4357.0	4229.7836	127.2164
5377	80.41121	4334.0	4253.382	80.618
5378	80.42551	4216.0	4274.43	-58.43
5379	80.43982	4315.0	4288.5358	26.4642
5380	80.45413	4292.0	4289.906	2.094
5381	80.46843	4255.0	4274.5808	-19.5808
5382	80.48274	4282.0	4243.3103	38.6897
5383	80.49704	4201.0	4200.8612	0.1388
5384	80.51135	4273.0	4154.1058	118.8942
5385	80.52566	4148.0	4109.9144	38.0856
5386	80.53996	4227.0	4073.3177	153.6823
5387	80.55427	4184.0	4046.6215	137.3785
5388	80.56858	4212.0	4030.1374	181.8626
5389	80.58288	4281.0	4023.2237	257.7763
5390	80.59719	4274.0	4024.5683	249.4317
5391	80.61150	4180.0	4032.2887	147.7113
5392	80.62580	4350.0	4043.6397	306.3603
5393	80.64011	4181.0	4054.9984	126.0016
5394	80.65442	4210.0	4063.0486	146.9514
5395	80.66872	4264.0	4066.4493	197.5507
5396	80.68303	4245.0	4066.0649	178.9351
5397	80.69733	4114.0	4062.7947	51.2053
5398	80.71164	4337.0	4056.0135	280.9865
5399	80.72595	4161.0	4044.6004	116.3996
5400	80.74025	4299.0	4028.7858	270.2142
5401	80.75456	4270.0	4011.4544	258.5456
5402	80.76887	4214.0	3997.3546	216.6454
5403	80.78317	4182.0	3990.5083	191.4917
5404	80.79748	4222.0	3991.6594	230.3406
5405	80.81179	4222.0	3997.5098	224.4902
5406	80.82609	4264.0	4002.6406	261.3594
5407	80.84040	4286.0	4003.3385	282.6615
5408	80.85470	4207.0	3999.6113	207.3887
5409	80.86901	4111.0	3993.7102	117.2898
5410	80.88332	4266.0	3986.4615	279.5385
5411	80.89762	4279.0	3977.0363	301.9637
5412	80.91193	4134.0	3965.5683	168.4317
5413	80.92624	4231.0	3955.0978	275.9022
5414	80.94054	4244.0	3949.4767	294.5233
5415	80.95485	4255.0	3951.1153	303.8847
5416	80.96916	4215.0	3959.9624	255.0376
5417	80.98346	4250.0	3974.8092	275.1908
5418	80.99777	4234.0	3994.4885	239.5115
5419	81.01208	4301.0	4017.6937	283.3063
5420	81.02638	4299.0	4042.0104	256.9896
5421	81.04069	4234.0	4064.2895	169.7105
5422	81.05499	4241.0	4082.0718	158.9282
5423	81.06930	4263.0	4094.6717	168.3283
5424	81.08361	4242.0	4102.4999	139.5001
5425	81.09791	4241.0	4107.2682	133.7318
5426	81.11222	4286.0	4112.7983	173.2017
5427	81.12653	4273.0	4123.9807	149.0193
5428	81.14083	4198.0	4144.9255	53.0745
5429	81.15514	4235.0	4177.6907	57.3093
5430	81.16945	4174.0	4221.0967	-47.0967
5431	81.18375	4217.0	4268.5917	-51.5917
5432	81.19806	4274.0	4307.7057	-33.7057
5433	81.21236	4161.0	4325.4693	-164.4693
5434	81.22667	4205.0	4317.8767	-112.8767
5435	81.24098	4167.0	4292.4236	-125.4236
5436	81.25528	4212.0	4260.2598	-48.2598
5437	81.26959	4305.0	4226.9643	78.0357
5438	81.28390	4317.0	4192.0427	124.9573
5439	81.29820	4229.0	4154.676	74.324
5440	81.31251	4238.0	4117.6793	120.3207
5441	81.32682	4306.0	4086.1929	219.8071
5442	81.34112	4313.0	4064.4694	248.5306
5443	81.35543	4241.0	4054.2327	186.7673
5444	81.36974	4174.0	4055.7331	118.2669
5445	81.38404	4243.0	4067.1469	175.8531
5446	81.39835	4195.0	4084.9707	110.0293
5447	81.41265	4210.0	4105.8888	104.1112
5448	81.42696	4312.0	4127.358	184.642
5449	81.44127	4279.0	4145.8013	133.1987
5450	81.45557	4248.0	4155.5573	92.4427
5451	81.46988	4212.0	4151.6864	60.3136
5452	81.48419	4214.0	4132.7897	81.2103
5453	81.49849	4231.0	4100.6579	130.3421
5454	81.51280	4154.0	4058.1314	95.8686
5455	81.52711	4188.0	4008.8924	179.1076
5456	81.54141	4201.0	3957.5698	243.4302
5457	81.55572	4144.0	3909.3119	234.6881
5458	81.57002	4178.0	3868.3094	309.6906
5459	81.58433	4185.0	3837.0003	347.9997
5460	81.59864	4142.0	3816.1087	325.8913
5461	81.61294	4158.0	3805.2183	352.7817
5462	81.62725	4037.0	3802.9733	234.0267
5463	81.64156	4117.0	3807.4439	309.5561
5464	81.65586	4120.0	3816.8243	303.1757
5465	81.67017	4065.0	3829.9921	235.0079
5466	81.68448	4232.0	3846.083	385.917
5467	81.69878	4094.0	3862.0782	231.9218
5468	81.71309	4108.0	3873.9423	234.0577
5469	81.72740	4098.0	3878.5073	219.4927
5470	81.74170	4136.0	3874.804	261.196
5471	81.75601	4105.0	3863.0623	241.9377
5472	81.77031	4197.0	3844.1681	352.8319
5473	81.78462	4239.0	3819.5106	419.4894
5474	81.79893	4130.0	3791.6694	338.3306
5475	81.81323	4058.0	3763.5582	294.4418
5476	81.82754	4146.0	3737.8727	408.1273
5477	81.84185	4141.0	3716.7324	424.2676
5478	81.85615	4046.0	3701.468	344.532
5479	81.87046	4137.0	3692.2375	444.7625
5480	81.88477	4109.0	3688.3297	420.6703
5481	81.89907	4125.0	3688.7769	436.2231
5482	81.91338	3999.0	3692.9823	306.0177
5483	81.92768	4047.0	3700.464	346.536
5484	81.94199	4201.0	3710.1237	490.8763
5485	81.95630	4191.0	3720.363	470.637
5486	81.97060	4003.0	3730.1624	272.8376
5487	81.98491	4137.0	3740.3687	396.6313
5488	81.99922	4251.0	3752.4073	498.5927
5489	82.01352	4191.0	3767.4979	423.5021
5490	82.02783	4140.0	3785.5324	354.4676
5491	82.04214	4175.0	3804.7832	370.2168
5492	82.05644	4099.0	3822.2606	276.7394
5493	82.07075	4161.0	3834.7081	326.2919
5494	82.08506	4171.0	3839.3305	331.6695
5495	82.09936	4118.0	3834.8369	283.1631
5496	82.11367	4100.0	3821.7587	278.2413
5497	82.12797	4141.0	3803.3487	337.6513
5498	82.14228	4229.0	3783.8913	445.1087
5499	82.15659	4171.0	3766.6461	404.3539
5500	82.17089	4135.0	3753.0245	381.9755
5501	82.18520	4192.0	3743.8054	448.1946
5502	82.19951	4155.0	3739.5559	415.4441
5503	82.21381	4159.0	3740.2434	418.7566
5504	82.22812	4139.0	3745.1046	393.8954
5505	82.24243	4140.0	3752.9703	387.0297
5506	82.25673	4105.0	3763.1094	341.8906
5507	82.27104	4203.0	3776.2048	426.7952
5508	82.28534	4075.0	3793.8657	281.1343
5509	82.29965	4114.0	3816.6509	297.3491
5510	82.31396	4164.0	3842.9053	321.0947
5511	82.32826	4114.0	3869.2855	244.7145
5512	82.34257	4234.0	3891.7254	342.2746
5513	82.35688	4349.0	3906.4559	442.5441
5514	82.37118	4330.0	3911.2266	418.7734
5515	82.38549	4317.0	3907.0033	409.9967
5516	82.39980	4453.0	3898.3241	554.6759
5517	82.41410	4507.0	3889.7163	617.2837
5518	82.42841	4719.0	3883.2542	835.7458
5519	82.44272	4736.0	3877.9464	858.0536
5520	82.45702	4867.0	3871.2158	995.7842
5521	82.47133	4879.0	3860.66	1018.34
5522	82.48563	4786.0	3845.2322	940.7678
5523	82.49994	4554.0	3825.9735	728.0265
5524	82.51425	4346.0	3805.6723	540.3277
5525	82.52855	4226.0	3787.734	438.266
5526	82.54286	4227.0	3774.9284	452.0716
5527	82.55717	4131.0	3768.6874	362.3126
5528	82.57147	4201.0	3768.7737	432.2263
5529	82.58578	4222.0	3773.8951	448.1049
5530	82.60009	4169.0	3782.3058	386.6942
5531	82.61439	4165.0	3791.4246	373.5754
5532	82.62870	4212.0	3799.0869	412.9131
5533	82.64300	4228.0	3804.302	423.698
5534	82.65731	4117.0	3808.0982	308.9018
5535	82.67162	4160.0	3812.3295	347.6705
5536	82.68592	4286.0	3818.4077	467.5923
5537	82.70023	4152.0	3826.2933	325.7067
5538	82.71454	4140.0	3834.8236	305.1764
5539	82.72884	4145.0	3842.9474	302.0526
5540	82.74315	4199.0	3850.7305	348.2695
5541	82.75746	4167.0	3859.5835	307.4165
5542	82.77176	4222.0	3871.8385	350.1615
5543	82.78607	4222.0	3889.0572	332.9428
5544	82.80038	4204.0	3911.1557	292.8443
5545	82.81468	4258.0	3936.4607	321.5393
5546	82.82899	4209.0	3962.5584	246.4416
5547	82.84329	4221.0	3986.4601	234.5399
5548	82.85760	4315.0	4004.3403	310.6597
5549	82.87191	4230.0	4011.8111	218.1889
5550	82.88621	4234.0	4006.4329	227.5671
5551	82.90052	4232.0	3989.8906	242.1094
5552	82.91483	4280.0	3968.0173	311.9827
5553	82.92913	4300.0	3947.8902	352.1098
5554	82.94344	4363.0	3934.7116	428.2884
5555	82.95775	4476.0	3931.4386	544.5614
5556	82.97205	4435.0	3939.2196	495.7804
5557	82.98636	4606.0	3957.9635	648.0365
5558	83.00066	4630.0	3986.3699	643.6301
5559	83.01497	4483.0	4021.8976	461.1024
5560	83.02928	4414.0	4061.0023	352.9977
5561	83.04358	4389.0	4099.6878	289.3122
5562	83.05789	4269.0	4134.9476	134.0524
5563	83.07220	4280.0	4166.3533	113.6467
5564	83.08650	4306.0	4194.0399	111.9601
5565	83.10081	4352.0	4217.4654	134.5346
5566	83.11512	4310.0	4235.0745	74.9255
5567	83.12942	4271.0	4246.9346	24.0654
5568	83.14373	4274.0	4254.3259	19.6741
5569	83.15804	4397.0	4258.1661	138.8339
5570	83.17234	4188.0	4257.9349	-69.9349
5571	83.18665	4251.0	4253.6228	-2.6228
5572	83.20095	4187.0	4248.8066	-61.8066
5573	83.21526	4199.0	4249.7914	-50.7914
5574	83.22957	4171.0	4262.6064	-91.6064
5575	83.24387	4020.0	4288.8032	-268.8032
5576	83.25818	4274.0	4324.237	-50.237
5577	83.27249	4179.0	4359.7123	-180.7123
5578	83.28679	4211.0	4383.9651	-172.9651
5579	83.30110	4193.0	4389.401	-196.401
5580	83.31541	4155.0	4376.7277	-221.7277
5581	83.32971	4178.0	4353.1994	-175.1994
5582	83.34402	4222.0	4326.5084	-104.5084
5583	83.35832	4117.0	4300.3286	-183.3286
5584	83.37263	4261.0	4275.3308	-14.3308
5585	83.38694	4137.0	4252.2452	-115.2452
5586	83.40124	4176.0	4232.2309	-56.2309
5587	83.41555	4105.0	4215.2607	-110.2607
5588	83.42986	4037.0	4200.179	-163.179
5589	83.44416	4095.0	4185.7607	-90.7607
5590	83.45847	4052.0	4174.019	-122.019
5591	83.47278	4141.0	4169.0039	-28.0039
5592	83.48708	3995.0	4174.3725	-179.3725
5593	83.50139	3935.0	4191.8806	-256.8806
5594	83.51570	4057.0	4220.5938	-163.5938
5595	83.53000	3979.0	4256.7079	-277.7079
5596	83.54431	4065.0	4293.3543	-228.3543
5597	83.55861	4139.0	4322.2672	-183.2672
5598	83.57292	4104.0	4335.6141	-231.6141
5599	83.58723	4130.0	4327.3753	-197.3753
5600	83.60153	4122.0	4295.5199	-173.5199
5601	83.61584	3965.0	4244.3809	-279.3809
5602	83.63015	4201.0	4183.8334	17.1666
5603	83.64445	4070.0	4123.9465	-53.9465
5604	83.65876	4096.0	4071.1204	24.8796
5605	83.67307	4148.0	4027.2947	120.7053
5606	83.68737	4060.0	3991.5469	68.4531
5607	83.70168	3967.0	3962.3798	4.6202
5608	83.71598	4078.0	3940.0132	137.9868
5609	83.73029	4141.0	3925.7766	215.2234
5610	83.74460	4035.0	3920.138	114.862
5611	83.75890	4019.0	3921.8637	97.1363
5612	83.77321	4051.0	3928.4992	122.5008
5613	83.78752	4196.0	3937.9984	258.0016
5614	83.80182	3966.0	3949.7204	16.2796
5615	83.81613	4043.0	3963.4231	79.5769
5616	83.83044	4045.0	3977.8552	67.1448
5617	83.84474	4153.0	3990.5479	162.4521
5618	83.85905	3919.0	3998.941	-79.941
5619	83.87336	3955.0	4001.2718	-46.2718
5620	83.88766	3959.0	3995.957	-36.957
5621	83.90197	3967.0	3981.4478	-14.4478
5622	83.91627	4023.0	3958.2533	64.7467
5623	83.93058	4079.0	3930.1671	148.8329
5624	83.94489	3987.0	3902.447	84.553
5625	83.95919	3975.0	3878.9274	96.0726
5626	83.97350	4041.0	3861.3279	179.6721
5627	83.98781	3879.0	3849.8407	29.1593
5628	84.00211	4044.0	3843.6458	200.3542
5629	84.01642	4010.0	3840.5871	169.4129
5630	84.03073	4002.0	3837.9904	164.0096
5631	84.04503	4031.0	3834.2262	196.7738
5632	84.05934	4011.0	3830.601	180.399
5633	84.07364	3903.0	3830.4516	72.5484
5634	84.08795	4011.0	3836.7051	174.2949
5635	84.10226	4004.0	3849.9211	154.0789
5636	84.11656	4028.0	3867.6932	160.3068
5637	84.13087	4039.0	3885.4787	153.5213
5638	84.14518	4021.0	3898.8424	122.1576
5639	84.15948	4023.0	3905.7069	117.2931
5640	84.17379	4115.0	3906.7392	208.2608
5641	84.18810	3968.0	3904.5333	63.4667
5642	84.20240	3895.0	3901.3733	-6.3733
5643	84.21671	4078.0	3898.3853	179.6147
5644	84.23102	4060.0	3896.0153	163.9847
5645	84.24532	3995.0	3894.8853	100.1147
5646	84.25963	3977.0	3895.9013	81.0987
5647	84.27393	3921.0	3899.8813	21.1187
5648	84.28824	4061.0	3907.0449	153.9551
5649	84.30255	3943.0	3916.6878	26.3122
5650	84.31685	3958.0	3927.8355	30.1645
5651	84.33116	4018.0	3940.7658	77.2342
5652	84.34547	3957.0	3956.9757	0.0243
5653	84.35977	3981.0	3977.6226	3.3774
5654	84.37408	4052.0	4001.6068	50.3932
5655	84.38839	4138.0	4025.3157	112.6843
5656	84.40269	4097.0	4044.4748	52.5252
5657	84.41700	4018.0	4057.3981	-39.3981
5658	84.43130	3965.0	4066.9532	-101.9532
5659	84.44561	4057.0	4078.9129	-21.9129
5660	84.45992	4034.0	4097.4828	-63.4828
5661	84.47422	4129.0	4122.8882	6.1118
5662	84.48853	3973.0	4149.7324	-176.7324
5663	84.50284	3921.0	4168.647	-247.647
5664	84.51714	4009.0	4171.2777	-162.2777
5665	84.53145	3884.0	4156.7416	-272.7416
5666	84.54576	3978.0	4133.3988	-155.3988
5667	84.56006	3968.0	4112.6206	-144.6206
5668	84.57437	3979.0	4102.0176	-123.0176
5669	84.58868	4101.0	4103.4263	-2.4263
5670	84.60298	3901.0	4114.3578	-213.3578
5671	84.61729	4038.0	4129.7646	-91.7646
5672	84.63159	4004.0	4142.9646	-138.9646
5673	84.64590	3974.0	4146.987	-172.987
5674	84.66021	3967.0	4137.4658	-170.4658
5675	84.67451	3929.0	4115.278	-186.278
5676	84.68882	4014.0	4086.5357	-72.5357
5677	84.70313	4016.0	4059.8615	-43.8615
5678	84.71743	3920.0	4042.4312	-122.4312
5679	84.73174	3901.0	4036.6139	-135.6139
5680	84.74605	3994.0	4039.3006	-45.3006
5681	84.76035	4035.0	4043.0459	-8.0459
5682	84.77466	3885.0	4039.6616	-154.6616
5683	84.78896	3971.0	4024.9924	-53.9924
5684	84.80327	3993.0	4001.3436	-8.3436
5685	84.81758	3941.0	3975.686	-34.686
5686	84.83188	3964.0	3954.8111	9.1889
5687	84.84619	3829.0	3941.9182	-112.9182
5688	84.86050	4038.0	3935.7488	102.2512
5689	84.87480	3877.0	3932.3005	-55.3005
5690	84.88911	3914.0	3927.4724	-13.4724
5691	84.90342	3880.0	3918.7904	-38.7904
5692	84.91772	3790.0	3905.4403	-115.4403
5693	84.93203	3799.0	3888.0441	-89.0441
5694	84.94634	3938.0	3868.9115	69.0885
5695	84.96064	4014.0	3851.5588	162.4412
5696	84.97495	3875.0	3839.2866	35.7134
5697	84.98925	3886.0	3834.0156	51.9844
5698	85.00356	3916.0	3836.1148	79.8852
5699	85.01787	3891.0	3844.5761	46.4239
5700	85.03217	3817.0	3856.5335	-39.5335
5701	85.04648	3893.0	3868.5181	24.4819
5702	85.06079	3891.0	3877.2877	13.7123
5703	85.07509	3895.0	3881.239	13.761
5704	85.08940	3914.0	3880.1383	33.8617
5705	85.10371	3755.0	3875.0067	-120.0067
5706	85.11801	3897.0	3867.0178	29.9822
5707	85.13232	3860.0	3856.311	3.689
5708	85.14662	3962.0	3842.9746	119.0254
5709	85.16093	3868.0	3828.1244	39.8756
5710	85.17524	3898.0	3814.3138	83.6862
5711	85.18954	3939.0	3803.7533	135.2467
5712	85.20385	3900.0	3796.9174	103.0826
5713	85.21816	3923.0	3792.6446	130.3554
5714	85.23246	3957.0	3789.3017	167.6983
5715	85.24677	4033.0	3786.3022	246.6978
5716	85.26108	3944.0	3784.3261	159.6739
5717	85.27538	3925.0	3784.1838	140.8162
5718	85.28969	3859.0	3786.4165	72.5835
5719	85.30400	3946.0	3791.4002	154.5998
5720	85.31830	3988.0	3799.6776	188.3224
5721	85.33261	3890.0	3811.6399	78.3601
5722	85.34691	3862.0	3827.9705	34.0295
5723	85.36122	3862.0	3849.8491	12.1509
5724	85.37553	3757.0	3878.4579	-121.4579
5725	85.38983	3958.0	3913.189	44.811
5726	85.40414	3913.0	3951.113	-38.113
5727	85.41845	3831.0	3987.1853	-156.1853
5728	85.43275	3788.0	4016.5155	-228.5155
5729	85.44706	3962.0	4035.7058	-73.7058
5730	85.46137	3926.0	4041.246	-115.246
5731	85.47567	3925.0	4028.9205	-103.9205
5732	85.48998	3984.0	3996.7098	-12.7098
5733	85.50428	4004.0	3948.1275	55.8725
5734	85.51859	3858.0	3891.3266	-33.3266
5735	85.53290	3962.0	3834.6413	127.3587
5736	85.54720	3857.0	3783.3042	73.6958
5737	85.56151	3841.0	3739.9865	101.0135
5738	85.57582	3890.0	3705.8347	184.1653
5739	85.59012	3750.0	3681.0199	68.9801
5740	85.60443	3836.0	3665.5792	170.4208
5741	85.61874	3873.0	3659.567	213.433
5742	85.63304	3905.0	3663.0157	241.9843
5743	85.64735	3775.0	3675.6111	99.3889
5744	85.66166	3867.0	3696.2602	170.7398
5745	85.67596	3817.0	3723.0492	93.9508
5746	85.69027	3862.0	3753.4715	108.5285
5747	85.70457	3738.0	3784.8954	-46.8954
5748	85.71888	3895.0	3814.4402	80.5598
5749	85.73319	3851.0	3838.462	12.538
5750	85.74749	3779.0	3853.1274	-74.1274
5751	85.76180	3812.0	3856.6194	-44.6194
5752	85.77611	3851.0	3850.8013	0.1987
5753	85.79041	3815.0	3839.8749	-24.8749
5754	85.80472	3820.0	3828.0301	-8.0301
5755	85.81903	3781.0	3818.3939	-37.3939
5756	85.83333	3847.0	3813.2115	33.7885
5757	85.84764	3717.0	3813.5006	-96.5006
5758	85.86194	3699.0	3817.9705	-118.9705
5759	85.87625	3894.0	3822.2009	71.7991
5760	85.89056	3822.0	3819.3447	2.6553
5761	85.90486	3718.0	3804.7155	-86.7155
5762	85.91917	3700.0	3779.3313	-79.3313
5763	85.93348	3739.0	3749.181	-10.181
5764	85.94778	3793.0	3720.7615	72.2385
5765	85.96209	3739.0	3697.9032	41.0968
5766	85.97640	3771.0	3681.4598	89.5402
5767	85.99070	3654.0	3670.487	-16.487
5768	86.00501	3732.0	3663.2654	68.7346
5769	86.01932	3709.0	3657.8674	51.1326
5770	86.03362	3848.0	3652.697	195.303
5771	86.04793	3770.0	3647.3422	122.6578
5772	86.06223	3741.0	3642.2313	98.7687
5773	86.07654	3821.0	3638.0825	182.9175
5774	86.09085	3752.0	3635.5198	116.4802
5775	86.10515	3665.0	3635.3815	29.6185
5776	86.11946	3720.0	3638.4967	81.5033
5777	86.13377	3787.0	3644.8375	142.1625
5778	86.14807	3747.0	3652.3872	94.6128
5779	86.16238	3763.0	3658.5817	104.4183
5780	86.17669	3708.0	3662.0188	45.9812
5781	86.19099	3740.0	3663.6859	76.3141
5782	86.20530	3738.0	3666.4817	71.5183
5783	86.21960	3798.0	3673.6422	124.3578
5784	86.23391	3675.0	3686.8716	-11.8716
5785	86.24822	3754.0	3705.6763	48.3237
5786	86.26252	3675.0	3726.4668	-51.4668
5787	86.27683	3730.0	3743.1326	-13.1326
5788	86.29114	3583.0	3749.4632	-166.4632
5789	86.30544	3668.0	3742.862	-74.862
5790	86.31975	3684.0	3725.6312	-41.6312
5791	86.33406	3669.0	3702.7856	-33.7856
5792	86.34836	3621.0	3679.2605	-58.2605
5793	86.36267	3725.0	3658.6397	66.3603
5794	86.37698	3754.0	3643.684	110.316
5795	86.39128	3781.0	3636.7714	144.2286
5796	86.40559	3750.0	3639.3992	110.6008
5797	86.41989	3691.0	3652.0759	38.9241
5798	86.43420	3774.0	3674.0297	99.9703
5799	86.44851	3781.0	3703.0411	77.9589
5800	86.46281	3681.0	3735.327	-54.327
5801	86.47712	3696.0	3766.2282	-70.2282
5802	86.49143	3654.0	3791.9907	-137.9907
5803	86.50573	3792.0	3811.7926	-19.7926
5804	86.52004	3715.0	3825.5604	-110.5604
5805	86.53435	3765.0	3832.6876	-67.6876
5806	86.54865	3732.0	3832.1341	-100.1341
5807	86.56296	3728.0	3823.8142	-95.8142
5808	86.57726	3672.0	3809.5789	-137.5789
5809	86.59157	3785.0	3791.9595	-6.9595
5810	86.60588	3829.0	3772.5193	56.4807
5811	86.62018	3618.0	3751.1601	-133.1601
5812	86.63449	3672.0	3728.2896	-56.2896
5813	86.64880	3657.0	3705.871	-48.871
5814	86.66310	3619.0	3687.4419	-68.4419
5815	86.67741	3877.0	3676.4164	200.5836
5816	86.69172	3664.0	3674.6583	-10.6583
5817	86.70602	3766.0	3682.1379	83.8621
5818	86.72033	3691.0	3697.2342	-6.2342
5819	86.73464	3684.0	3717.4821	-33.4821
5820	86.74894	3803.0	3740.4685	62.5315
5821	86.76325	3735.0	3764.2105	-29.2105
5822	86.77755	3736.0	3786.512	-50.512
5823	86.79186	3637.0	3804.9795	-167.9795
5824	86.80617	3683.0	3817.7005	-134.7005
5825	86.82047	3670.0	3822.5254	-152.5254
5826	86.83478	3717.0	3817.897	-100.897
5827	86.84909	3812.0	3802.9424	9.0576
5828	86.86339	3694.0	3779.2272	-85.2272
5829	86.87770	3690.0	3751.0639	-61.0639
5830	86.89201	3732.0	3723.6038	8.3962
5831	86.90631	3722.0	3700.9695	21.0305
5832	86.92062	3736.0	3685.5663	50.4337
5833	86.93492	3663.0	3678.5455	-15.5455
5834	86.94923	3691.0	3679.4291	11.5709
5835	86.96354	3625.0	3686.2447	-61.2447
5836	86.97784	3646.0	3696.3692	-50.3692
5837	86.99215	3605.0	3707.7149	-102.7149
5838	87.00646	3686.0	3719.248	-33.248
5839	87.02076	3750.0	3729.9365	20.0635
5840	87.03507	3662.0	3738.2793	-76.2793
5841	87.04938	3650.0	3741.9279	-91.9279
5842	87.06368	3677.0	3739.1266	-62.1266
5843	87.07799	3760.0	3729.5693	30.4307
5844	87.09230	3546.0	3714.6028	-168.6028
5845	87.10660	3648.0	3695.0764	-47.0764
5846	87.12091	3663.0	3671.4378	-8.4378
5847	87.13521	3698.0	3644.9147	53.0853
5848	87.14952	3676.0	3618.2878	57.7122
5849	87.16383	3826.0	3595.047	230.953
5850	87.17813	3732.0	3578.1367	153.8633
5851	87.19244	3606.0	3569.025	36.975
5852	87.20675	3604.0	3567.94	36.06
5853	87.22105	3711.0	3573.839	137.161
5854	87.23536	3617.0	3584.8668	32.1332
5855	87.24967	3610.0	3598.6129	11.3871
5856	87.26397	3644.0	3612.8393	31.1607
5857	87.27828	3715.0	3626.0462	88.9538
5858	87.29258	3606.0	3637.679	-31.679
5859	87.30689	3691.0	3647.9051	43.0949
5860	87.32120	3687.0	3657.5656	29.4344
5861	87.33550	3687.0	3667.8488	19.1512
5862	87.34981	3705.0	3679.3667	25.6333
5863	87.36412	3735.0	3691.1695	43.8305
5864	87.37842	3641.0	3700.0971	-59.0971
5865	87.39273	3660.0	3702.196	-42.196
5866	87.40704	3664.0	3695.3752	-31.3752
5867	87.42134	3629.0	3680.9312	-51.9312
5868	87.43565	3810.0	3663.0993	146.9007
5869	87.44996	3747.0	3646.6396	100.3604
5870	87.46426	3545.0	3634.7866	-89.7866
5871	87.47857	3758.0	3628.9676	129.0324
5872	87.49287	3664.0	3629.0171	34.9829
5873	87.50718	3666.0	3633.7755	32.2245
5874	87.52149	3667.0	3642.036	24.964
5875	87.53579	3694.0	3652.9717	41.0283
5876	87.55010	3731.0	3665.61	65.39
5877	87.56441	3691.0	3678.6574	12.3426
5878	87.57871	3724.0	3691.2849	32.7151
5879	87.59302	3658.0	3703.7657	-45.7657
5880	87.60733	3692.0	3716.4959	-24.4959
5881	87.62163	3527.0	3729.3283	-202.3283
5882	87.63594	3647.0	3741.8037	-94.8037
5883	87.65024	3672.0	3753.4783	-81.4783
5884	87.66455	3691.0	3763.6686	-72.6686
5885	87.67886	3685.0	3771.4549	-86.4549
5886	87.69316	3695.0	3776.1705	-81.1705
5887	87.70747	3701.0	3778.3249	-77.3249
5888	87.72178	3793.0	3780.055	12.945
5889	87.73608	3708.0	3784.784	-76.784
5890	87.75039	3699.0	3795.0118	-96.0118
5891	87.76470	3618.0	3810.9469	-192.9469
5892	87.77900	3711.0	3829.8229	-118.8229
5893	87.79331	3698.0	3847.2047	-149.2047
5894	87.80762	3533.0	3859.0735	-326.0735
5895	87.82192	3708.0	3863.6333	-155.6333
5896	87.83623	3711.0	3860.8199	-149.8199
5897	87.85053	3743.0	3851.4137	-108.4137
5898	87.86484	3815.0	3837.14	-22.14
5899	87.87915	3821.0	3821.2361	-0.2361
5900	87.89345	3646.0	3807.657	-161.657
5901	87.90776	3699.0	3799.7749	-100.7749
5902	87.92207	3617.0	3800.0064	-183.0064
5903	87.93637	3673.0	3808.2198	-135.2198
5904	87.95068	3733.0	3822.306	-89.306
5905	87.96499	3570.0	3838.6951	-268.6951
5906	87.97929	3723.0	3853.5345	-130.5345
5907	87.99360	3752.0	3864.1243	-112.1243
5908	88.00790	3783.0	3869.5755	-86.5755
5909	88.02221	3747.0	3871.1089	-124.1089
5910	88.03652	3549.0	3871.5789	-322.5789
5911	88.05082	3755.0	3873.3688	-118.3688
5912	88.06513	3635.0	3876.5344	-241.5344
5913	88.07944	3772.0	3878.667	-106.667
5914	88.09374	3582.0	3875.8955	-293.8955
5915	88.10805	3760.0	3865.4059	-105.4059
5916	88.12236	3667.0	3846.5844	-179.5844
5917	88.13666	3612.0	3821.0493	-209.0493
5918	88.15097	3591.0	3791.7858	-200.7858
5919	88.16528	3521.0	3762.1514	-241.1514
5920	88.17958	3659.0	3735.6635	-76.6635
5921	88.19389	3738.0	3715.2564	22.7436
5922	88.20819	3777.0	3702.2404	74.7596
5923	88.22250	3779.0	3696.3088	82.6912
5924	88.23681	3796.0	3695.3139	100.6861
5925	88.25111	3644.0	3696.9209	-52.9209
5926	88.26542	3672.0	3699.2363	-27.2363
5927	88.27973	3640.0	3700.8394	-60.8394
5928	88.29403	3641.0	3700.7347	-59.7347
5929	88.30834	3612.0	3698.7439	-86.7439
5930	88.32265	3674.0	3695.64	-21.64
5931	88.33695	3640.0	3692.5708	-52.5708
5932	88.35126	3608.0	3690.684	-82.684
5933	88.36556	3589.0	3690.5255	-101.5255
5934	88.37987	3563.0	3691.7206	-128.7206
5935	88.39418	3680.0	3693.4761	-13.4761
5936	88.40848	3496.0	3695.5626	-199.5626
5937	88.42279	3583.0	3698.7888	-115.7888
5938	88.43710	3579.0	3704.7679	-125.7679
5939	88.45140	3648.0	3714.5361	-66.5361
5940	88.46571	3672.0	3726.8027	-54.8027
5941	88.48002	3634.0	3737.1713	-103.1713
5942	88.49432	3527.0	3739.4234	-212.4234
5943	88.50863	3694.0	3729.6449	-35.6449
5944	88.52294	3613.0	3709.2957	-96.2957
5945	88.53724	3521.0	3683.9467	-162.9467
5946	88.55155	3634.0	3659.5568	-25.5568
5947	88.56585	3647.0	3639.8883	7.1117
5948	88.58016	3547.0	3625.8287	-78.8287
5949	88.59447	3560.0	3616.1032	-56.1032
5950	88.60877	3454.0	3608.5381	-154.5381
5951	88.62308	3567.0	3601.4694	-34.4694
5952	88.63739	3521.0	3594.7358	-73.7358
5953	88.65169	3612.0	3589.3686	22.6314
5954	88.66600	3501.0	3586.7506	-85.7506
5955	88.68031	3632.0	3587.3362	44.6638
5956	88.69461	3433.0	3590.2527	-157.2527
5957	88.70892	3566.0	3593.9395	-27.9395
5958	88.72322	3627.0	3597.2409	29.7591
5959	88.73753	3618.0	3599.8347	18.1653
5960	88.75184	3520.0	3601.9018	-81.9018
5961	88.76614	3649.0	3603.0835	45.9165
5962	88.78045	3459.0	3602.2328	-143.2328
5963	88.79476	3602.0	3598.7137	3.2863
5964	88.80906	3505.0	3593.4155	-88.4155
5965	88.82337	3559.0	3588.5857	-29.5857
5966	88.83768	3625.0	3586.2768	38.7232
5967	88.85198	3549.0	3587.1215	-38.1215
5968	88.86629	3471.0	3590.0811	-119.0811
5969	88.88060	3647.0	3593.2321	53.7679
5970	88.89490	3522.0	3594.3893	-72.3893
5971	88.90921	3551.0	3592.2623	-41.2623
5972	88.92351	3537.0	3587.4726	-50.4726
5973	88.93782	3568.0	3582.2368	-14.2368
5974	88.95213	3531.0	3578.9397	-47.9397
5975	88.96643	3559.0	3578.5019	-19.5019
5976	88.98074	3657.0	3579.7336	77.2664
5977	88.99505	3565.0	3579.3286	-14.3286
5978	89.00935	3565.0	3574.2405	-9.2405
5979	89.02366	3530.0	3563.3013	-33.3013
5980	89.03797	3432.0	3548.1138	-116.1138
5981	89.05227	3506.0	3532.0324	-26.0324
5982	89.06658	3620.0	3518.213	101.787
5983	89.08088	3634.0	3508.5362	125.4638
5984	89.09519	3572.0	3503.358	68.642
5985	89.10950	3627.0	3501.8731	125.1269
5986	89.12380	3552.0	3503.052	48.948
5987	89.13811	3488.0	3506.3139	-18.3139
5988	89.15242	3529.0	3511.4771	17.5229
5989	89.16672	3491.0	3518.2287	-27.2287
5990	89.18103	3589.0	3526.0911	62.9089
5991	89.19534	3496.0	3534.9074	-38.9074
5992	89.20964	3520.0	3544.4332	-24.4332
5993	89.22395	3543.0	3553.923	-10.923
5994	89.23826	3517.0	3561.7525	-44.7525
5995	89.25256	3570.0	3565.8395	4.1605
5996	89.26687	3528.0	3564.7654	-36.7654
5997	89.28117	3505.0	3558.5467	-53.5467
5998	89.29548	3519.0	3548.6569	-29.6569
5999	89.30979	3598.0	3537.4752	60.5248
6000	89.32409	3597.0	3527.6729	69.3271
6001	89.33840	3591.0	3521.3732	69.6268
6002	89.35271	3433.0	3519.6349	-86.6349
6003	89.36701	3553.0	3522.2322	30.7678
6004	89.38132	3507.0	3528.05	-21.05
6005	89.39563	3585.0	3536.0058	48.9942
6006	89.40993	3403.0	3545.8767	-142.8767
6007	89.42424	3500.0	3557.7046	-57.7046
6008	89.43854	3512.0	3571.1446	-59.1446
6009	89.45285	3496.0	3584.8753	-88.8753
6010	89.46716	3523.0	3597.3542	-74.3542
6011	89.48146	3482.0	3607.9654	-125.9654
6012	89.49577	3592.0	3617.1089	-25.1089
6013	89.51008	3478.0	3625.5757	-147.5757
6014	89.52438	3550.0	3633.9183	-83.9183
6015	89.53869	3608.0	3642.5463	-34.5463
6016	89.55300	3589.0	3651.7791	-62.7791
6017	89.56730	3477.0	3661.141	-184.141
6018	89.58161	3503.0	3668.6112	-165.6112
6019	89.59592	3561.0	3670.7799	-109.7799
6020	89.61022	3534.0	3664.8737	-130.8737
6021	89.62453	3504.0	3650.9563	-146.9563
6022	89.63883	3474.0	3631.9763	-157.9763
6023	89.65314	3578.0	3611.5538	-33.5538
6024	89.66745	3531.0	3592.0755	-61.0755
6025	89.68175	3549.0	3574.5438	-25.5438
6026	89.69606	3567.0	3559.6208	7.3792
6027	89.71037	3571.0	3548.0087	22.9913
6028	89.72467	3529.0	3540.1902	-11.1902
6029	89.73898	3502.0	3535.9213	-33.9213
6030	89.75329	3501.0	3534.3393	-33.3393
6031	89.76759	3554.0	3534.4985	19.5015
6032	89.78190	3476.0	3535.7277	-59.7277
6033	89.79620	3629.0	3537.9326	91.0674
6034	89.81051	3578.0	3541.6445	36.3555
6035	89.82482	3558.0	3547.6019	10.3981
6036	89.83912	3462.0	3556.2752	-94.2752
6037	89.85343	3475.0	3567.4133	-92.4133
6038	89.86774	3500.0	3579.985	-79.985
6039	89.88204	3454.0	3592.1831	-138.1831
6040	89.89635	3464.0	3601.852	-137.852
6041	89.91066	3407.0	3607.6552	-200.6552
6042	89.92496	3461.0	3609.8719	-148.8719
6043	89.93927	3392.0	3609.9358	-217.9358
6044	89.95358	3323.0	3609.7628	-286.7628
6045	89.96788	3493.0	3610.8137	-117.8137
6046	89.98219	3470.0	3613.6652	-143.6652
6047	89.99649	3476.0	3618.1201	-142.1201
6048	90.01080	3513.0	3623.4353	-110.4353
6049	90.02511	3567.0	3628.5289	-61.5289
6050	90.03941	3533.0	3631.6633	-98.6633
6051	90.05372	3431.0	3630.821	-199.821
6052	90.06803	3404.0	3625.1303	-221.1303
6053	90.08233	3467.0	3616.0131	-149.0131
